# Supplementary material
Source: publisher figshare collection journal article supplement (https://acs.figshare.com/ndownloader/files/4768153)

## Supporting Information-1 (SI and NMR spectra I) for:

### Total Synthesis of Agelagalastatin

Yong Joo Lee, Bo-Young Lee, Heung Bae Jeon, and Kwan Soo Kim\*

*Center for Bioactive Molecular Hybrids and Department of Chemistry,  
Yonsei University, Seoul 120-749, Korea.*

[kwon@yonsei.ac.kr](mailto:kwon@yonsei.ac.kr)

**General Methods.** All reactions were conducted under a positive pressure of dry argon with dry, freshly distilled solvents unless otherwise noted. All reagents were purchased from commercial suppliers and used without further purification unless otherwise noted. Dichloromethane and acetonitrile were distilled from calcium hydride and DMF was distilled from barium oxide. Ethyl acetate and toluene were distilled. Flash column chromatography was performed employing 230-400 mesh silica gel. Thin-layer chromatography was performed using silica gel 60 F254 precoated plates (0.25 mm thickness) with a fluorescent indicator. Visualization on TLC was achieved by UV light (254 nm) and a typical TLC indication solution (cerium sulfate / molybdic acid solution). NMR spectra were recorded on a 250 or 500 MHz NMR spectrometer. Chemical shifts were reported in parts per million (ppm) downfield from tetramethylsilane (TMS). IR spectra were obtained on a Nicolet Impact 400 spectrometer. MALDI-TOF was performed by the 4700 proteomics analyzer, HRMS-FAB by JEOL, JMS-AX505WA, HP 5890 Series II.

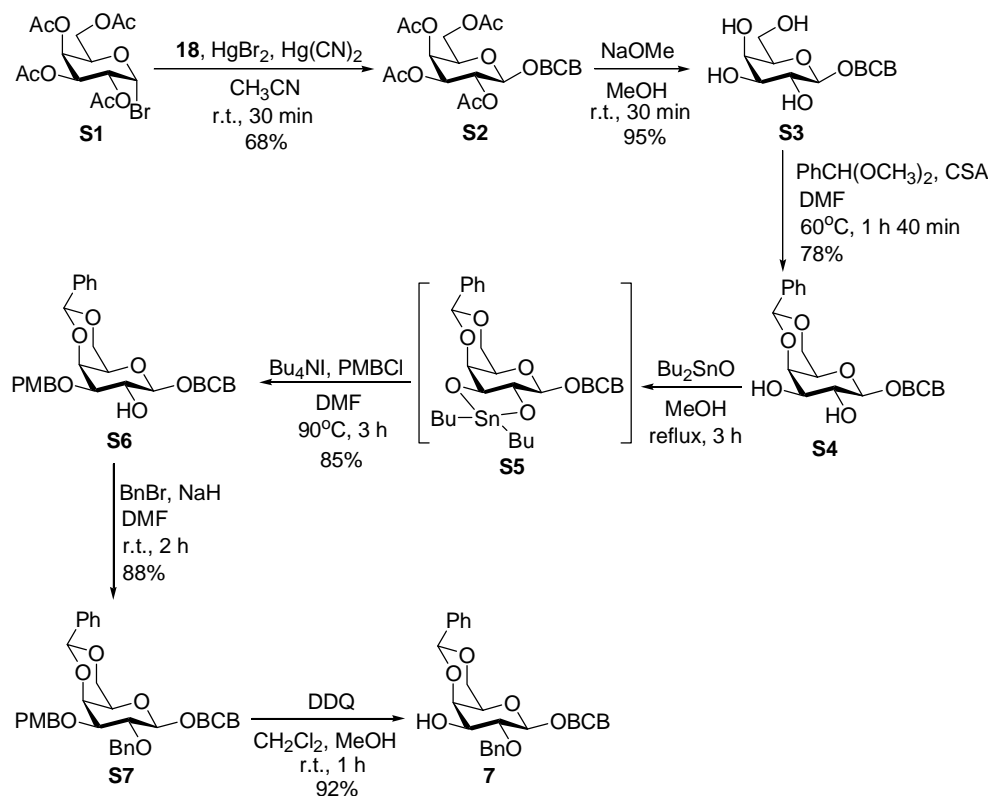

**SI-Scheme 1.** Preparation of monosaccharide **7**.

**2'-(Benzyloxycarbonyl)benzyl 2,3,4,6-tetra-*O*-acetyl- $\beta$ -D-galactopyranoside (**S2**).** To a stirred solution of 2,3,4,6-tetra-*O*-acetyl- $\alpha$ -D-galactopyranosyl bromide (**S1**) (5.0 g, 12.16 mmol) in acetonitrile (20 mL) at  $0^\circ\text{C}$  were added mercury (II) bromide (5.26 g, 14.59 mmol), mercury (II) cyanide (3.69 g, 14.61 mmol), and benzyl 2-hydroxymethylbenzoate (**18**) (4.4 g, 18.16 mmol). After stirring at  $0^\circ\text{C}$  for further 30 min, the reaction mixture was filtered and the filtrate was concentrated. The resulting oil was dissolved in  $\text{CH}_2\text{Cl}_2$  (50 mL) and the solution was washed with saturated aqueous  $\text{NaHCO}_3$  ( $2 \times 50$  mL) and brine (50 mL). The organic layer was dried over  $\text{MgSO}_4$  and concentrated in vacuo and the residue was purified by silica gel flash column chromatography (hexane/EtOAc, 2:1, v/v) to afford the title compound **S2** (4.74 g, 8.28 mmol,

86%) as a colorless oil.:  $R_f = 0.25$  (hexane/EtOAc, 2:1, v/v); IR (CHCl<sub>3</sub> film) 1225, 1713, 1751 cm<sup>-1</sup>;  $[\alpha]_D^{20} -27.7$  (*c* 1.3, CHCl<sub>3</sub>); <sup>1</sup>H NMR (250 MHz, CDCl<sub>3</sub>)  $\delta$  2.00 (s, 3 H), 2.03 (s, 3 H), 2.06 (s, 3 H), 2.17 (s, 3 H), 3.91 (t, *J* = 6.7 Hz, 1 H), 4.11–4.19 (m, 2 H), 4.59 (d, *J* = 7.9 Hz, 1 H), 5.01–5.10 (m, 2 H), 5.31–5.42 (m, 5 H), 7.31–7.65 (m, 8 H), 8.03 (d, *J* = 7.8 Hz); <sup>13</sup>C NMR (63 MHz, CDCl<sub>3</sub>)  $\delta$  20.7, 20.8(2), 20.9, 61.2, 66.9, 67.1, 69.1, 69.8, 70.8, 71.0, 101.1, 127.3, 127.5, 128.3, 128.5, 128.8, 130.8, 132.8, 135.9, 139.9, 166.6, 169.6, 170.3, 170.4, 170.5. Anal. calcd for C<sub>29</sub>H<sub>32</sub>O<sub>12</sub>: C, 60.83; H, 5.63. Found: C, 60.81; H, 5.72.

**2'-(Benzyloxycarbonyl)benzyl  $\beta$ -D-galactopyranoside (S3).** To a solution of compound **S2** (3.2 g, 5.59 mmol) in MeOH (100 mL) was added NaOMe (54 mg, 1.0 mmol.) at 0 °C. After stirring at room temperature for 30 min, the reaction mixture was neutralized with DOWEX CCR-3 (H<sup>+</sup> mode), filtered through Celite®, and concentrated in vacuo. The residue was purified by recrystallization (n-hexane/MeOH) to afford the title compound **S3** (2.15 g, 5.32 mmol, 95%) as a white solid.: m.p.= 92–93 °C;  $R_f = 0.33$  (CHCl<sub>3</sub>/MeOH, 9:1, v/v); IR (KBr) 1256, 1714, 3353 cm<sup>-1</sup>;  $[\alpha]_D^{20} -18.8$  (*c* 0.5, DMF); <sup>1</sup>H NMR (500 MHz, DMSO-d<sub>6</sub> + H<sub>2</sub>O)  $\delta$  3.32 (dd, *J* = 3.0, 9.6 Hz, 1 H), 3.37 (t, *J* = 5.8 Hz, 1 H), 3.42 (t, *J* = 8.6 Hz, 1 H), 3.49 (dd, *J* = 6.1, 10.5 Hz, 1 H), 3.54 (dd, *J* = 6.4, 10.8 Hz, 1 H), 3.67 (brs, 1 H), 4.21 (d, *J* = 7.6 Hz, 1 H), 4.91 and 5.10 (ABq, *J* = 14.8 Hz, 2 H), 5.29 (s, 2 H), 7.31–7.59 (m, 7 H), 7.81 (d, *J* = 7.7 Hz, 1 H), 7.86 (d, *J* = 7.7 Hz, 1 H); <sup>13</sup>C NMR (63 MHz, DMSO-d<sub>6</sub> + H<sub>2</sub>O)  $\delta$  60.8, 66.9, 68.3, 68.5, 71.1, 73.7, 75.5, 103.6, 127.7, 128.1, 128.3, 128.6, 128.7, 129.1, 130.4, 133.0, 136.4, 140.5, 166.9. Anal. calcd for C<sub>21</sub>H<sub>24</sub>O<sub>8</sub>: C, 62.37; H, 5.98. Found: C, 62.19; H, 5.88.

**2'-(Benzyloxycarbonyl)benzyl 4,6-*O*-benzylidene- $\beta$ -D-galactopyranoside (S4).** A solution of the compound **S3** (1.0 g, 2.47 mmol) and benzaldehyde dimethylacetal (408  $\mu$ L, 2.72 mmol) in the presence of camphor sulfonic acid (172 mg, 0.74 mmol) in DMF (20 mL) was stirred at 60 °C for 1 h 40 min. After quenched with triethylamine (1 mL), the reaction mixture was extracted with EtOAc (3  $\times$  50 mL). The combined organic layer was washed with saturated aqueous NH<sub>4</sub>Cl (2  $\times$  50 mL), brine (50 mL), dried over MgSO<sub>4</sub>, and concentrated in vacuo. The residue was purified by recrystallization (n-hexane/EtOAc) to afford the title compound **S4** (2.80 g, 70%) as a white solid.: m.p.= 177–178 °C; R<sub>f</sub> = 0.15 (hexane/EtOAc/CH<sub>2</sub>Cl<sub>2</sub>, 2:4:4, v/v); IR (KBr) 1256, 1715, 3378 cm<sup>-1</sup>; [ $\alpha$ ]<sub>D</sub><sup>20</sup> –32.0 (c 0.5, DMF); <sup>1</sup>H NMR (250 MHz, DMSO-d<sub>6</sub>)  $\delta$  3.50–3.52 (m, 3 H), 4.05–4.09 (m, 3 H), 4.34–4.37 (m, 1 H), 4.96–4.98 (m, 1 H), 4.97 and 5.17 (ABq, *J* = 15.0 Hz, 2 H), 5.18–5.21 (m, 1 H), 5.34 (s, 2 H), 5.57 (s, 1 H), 7.35–7.65 (m, 13 H), 7.92 (d, *J* = 7.7 Hz, 1 H); <sup>13</sup>C NMR (63 MHz, DMSO-d<sub>6</sub>)  $\delta$  66.0, 66.3, 67.8, 68.6, 70.2, 71.9, 76.0, 99.8, 103.0, 126.3, 127.1, 127.6, 127.9, 128.1, 128.5, 130.0, 132.5, 136.0, 138.6, 140.3, 166.1. Anal. calcd for C<sub>28</sub>H<sub>28</sub>O<sub>8</sub>: C, 68.28; H, 5.73. Found: C, 68.21; H, 5.87.

**2'-(Benzyloxycarbonyl)benzyl 4,6-*O*-benzylidene-3-*O*-*p*-methoxybenzyl- $\beta$ -D-galactopyranoside (S6).** To a solution of compound **S4** (3.63 g, 7.37 mmol) in MeOH (30 mL) was added Bu<sub>2</sub>SnO (2.75 g, 11.05 mmol). The resulting solution was heated to reflux for 3 h. The solvent was removed and then concentrated in vacuo. The residue was dissolved in DMF (20 mL), then *p*-methoxybenzyl chloride (1.5 mL, 11.06 mmol) and Bu<sub>4</sub>NI (4.08 g, 11.04 mmol) were added. The reaction mixture was stirred at 60 °C for 3 h. The reaction mixture was diluted with EtOAc (50 mL) and quenched with saturated aqueous NH<sub>4</sub>Cl (7 mL). The combined organic layer was washed with saturated

aqueous  $\text{NH}_4\text{Cl}$  ( $2 \times 50$  mL) and brine (50 mL), dried ( $\text{MgSO}_4$ ), and concentrated in vacuo. The residue was purified by recrystallization (n-hexane/EtOAc) to afford the title compound **S6** (3.84 g, 6.27 mmol, 85%) as a white solid.: m.p.= 132–133 °C;  $R_f$  = 0.33 (hexane/EtOAc, 1:1, v/v); IR ( $\text{CHCl}_3$  film) 1255, 1713, 3207  $\text{cm}^{-1}$ ;  $[\alpha]_D^{20}$  +3.7 ( $c$  0.6,  $\text{CHCl}_3$ );  $^1\text{H}$  NMR (250 MHz,  $\text{CDCl}_3$ )  $\delta$  2.77 (brs, 1 H), 3.30 (brs, 1 H), 3.48 (dd,  $J$  = 3.0, 9.5 Hz, 1 H), 3.77 (s, 3 H), 3.97–4.08 (m, 3 H), 4.28 (d,  $J$  = 12.2 Hz, 1 H), 4.42 (d,  $J$  = 7.8 Hz, 1 H), 4.69 (s, 2 H), 5.09 and 5.28 (ABq,  $J$  = 13.6 Hz, 2 H), 5.32 (s, 2 H), 5.45 (s, 1 H), 6.85 (d,  $J$  = 8.3 Hz, 2 H), 7.23–7.53 (m, 14 H), 7.72 (d,  $J$  = 7.6 Hz, 1 H), 7.97 (d,  $J$  = 7.7 Hz, 1 H);  $^{13}\text{C}$  NMR (63 MHz,  $\text{CDCl}_3$ )  $\delta$  55.3, 66.8, 66.9, 69.3, 70.2, 71.2, 73.3, 78.9, 101.1, 102.8, 113.9, 126.5, 127.4, 128.1, 128.25, 128.3, 128.7, 128.9, 129.5, 130.3, 130.6, 132.6, 135.9, 137.9, 139.8, 159.3, 167.1. Anal. calcd for  $\text{C}_{36}\text{H}_{36}\text{O}_9$ : C, 70.57; H, 5.92. Found: C, 70.51; H, 6.02.

**2'-(Benzyloxycarbonyl)benzyl 2-O-benzyl-4,6-O-benzylidene-3-O-*p*-methoxybenzyl- $\beta$ -D-galactopyranoside (S7).** To a solution of **S6** (2.18 g, 3.56 mmol) and BnBr (636  $\mu\text{L}$ , 5.35 mmol) in DMF (10 mL) was added NaH (60%, 214 mg, 5.35 mmol) at 0 °C and then the ice bath was removed. After stirring at room temperature for 2 h, the reaction mixture was quenched with water (10 mL) and extracted with EtOAc ( $2 \times 50$  mL). The combined organic layer was washed with saturated aqueous  $\text{NH}_4\text{Cl}$  (50 mL) and brine (50 mL), dried ( $\text{MgSO}_4$ ), and concentrated in vacuo. The residue was purified by silica gel flash column chromatography (hexane/EtOAc, 1:1, v/v) to afford the title compound **S7** (2.2 g, 3.13 mmol, 88%) as a white solid.: m.p.= 129–130 °C;  $R_f$  = 0.6 (hexane/EtOAc, 1:1, v/v); IR ( $\text{CHCl}_3$  film) 1255, 1713  $\text{cm}^{-1}$ ;  $[\alpha]_D^{20}$  +1.0 ( $c$  1.0,  $\text{CHCl}_3$ );  $^1\text{H}$  NMR (250 MHz,  $\text{CDCl}_3$ )  $\delta$  3.28 (brs, 1 H), 3.56 (dd,  $J$  = 3.6, 9.6 Hz, 1 H), 3.78 (s, 3 H), 3.92–4.02 (m, 2

H), 4.09 (d,  $J = 3.4$  Hz, 1 H), 4.30 (d,  $J = 12.2$  Hz, 1 H), 4.52 (d,  $J = 7.8$  Hz, 1 H), 4.71–4.77 (m, 2 H), 4.85 and 4.95 (ABq,  $J = 10.8$  Hz, 2 H), 5.13 and 5.41 (ABq,  $J = 15.1$  Hz, 2 H), 5.29 (s, 2 H), 5.00 (s, 1 H), 6.83 (d,  $J = 8.6$  Hz, 2 H), 7.22–7.59 (m, 19 H), 7.84 (d,  $J = 7.7$  Hz, 1 H), 8.01 (d,  $J = 7.8$  Hz, 1 H);  $^{13}\text{C}$  NMR (63 MHz,  $\text{CDCl}_3$ )  $\delta$  55.4, 66.6, 66.7, 69.3, 71.7, 74.0, 75.5, 78.7, 79.1, 101.4, 103.2, 113.8, 126.6, 126.9, 127.4, 127.6, 128.2, 128.21, 128.30, 128.33, 128.7, 129.0, 129.5, 130.5, 130.6, 132.7, 136.1, 138.0, 138.9, 140.9, 159.3, 166.7. Anal. calcd for  $\text{C}_{43}\text{H}_{42}\text{O}_9$ : C, 73.49; H, 6.02. Found: C, 73.42; H, 6.17.

**2'-(Benzyloxycarbonyl)benzyl 2-O-benzyl-4,6-O-benzylidene- $\beta$ -D-galactopyranoside (7).** To a solution of compound **S7** (143 mg, 0.203 mmol) in  $\text{CH}_2\text{Cl}_2$  /  $\text{H}_2\text{O}$  (9.5 mL, 18:1, v/v) was added DDQ (60 mg, 0.264 mmol). After stirring at 0 °C for 1 h, the reaction mixture was quenched with  $\text{NaHCO}_3$  (5 mL) and extracted with  $\text{CH}_2\text{Cl}_2$  (2  $\times$  30 mL). The combined organic layer was washed with saturated aqueous  $\text{NaHCO}_3$  (2  $\times$  20 mL) and brine (20 mL), dried ( $\text{MgSO}_4$ ), and concentrated in vacuo. The residue was purified by silica gel flash column chromatography (hexane/EtOAc, 1:1, v/v) to afford the title compound **7** (109 mg, 0.187 mmol, 92%) as a white solid.: m.p.= 164–165 °C;  $R_f = 0.3$  (hexane/EtOAc, 1:1, v/v); IR ( $\text{CHCl}_3$  film) 1262, 1709, 3403  $\text{cm}^{-1}$ ;  $[\alpha]_D^{20} -12.2$  ( $c$  0.6,  $\text{CHCl}_3$ );  $^1\text{H}$  NMR (250 MHz,  $\text{CDCl}_3$ )  $\delta$  2.51–2.54 (m, 1 H), 3.43 (s, 1 H), 3.71–3.80 (m, 2 H), 4.07 and 4.32 (ABq,  $J = 12.4$  Hz, 2 H), 4.22 (s, 1 H), 4.55 (d,  $J = 7.3$  Hz, 1 H), 4.78 and 5.01 (ABq,  $J = 11.2$  Hz, 2 H), 5.15 and 5.41 (ABq,  $J = 14.8$  Hz, 2 H), 5.31 (s, 2 H), 5.56 (s, 1 H), 7.25–7.53 (m, 17 H), 7.82 (d,  $J = 7.7$  Hz, 1 H), 8.02 (d,  $J = 7.7$  Hz, 1 H);  $^{13}\text{C}$  NMR (63 MHz,  $\text{CDCl}_3$ )  $\delta$  66.7, 66.8, 69.3, 69.4, 75.2, 75.7, 79.6, 101.5, 103.1, 126.6, 127.1, 127.6, 127.8, 128.2, 128.3, 128.5, 128.7, 129.3, 130.7, 132.7, 136.1, 137.7, 138.6, 140.7, 166.8. Anal. calcd for  $\text{C}_{35}\text{H}_{34}\text{O}_8$ : C, 72.15; H, 5.88.

Found: C, 72.07; H, 5.95.

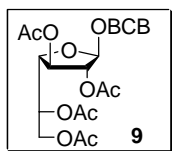

**2'-(Benzyloxycarbonyl)benzyl 2,3,5,6-tetra-*O*-acetyl- $\beta$ -D-galactofuranoside (**9**).** A solution of D-galactofuranosyl pentaacetate (**8**) (3.90 g, 10.0 mmol), thionyl chloride (5 mL), and acetic acid (2 mL) in  $\text{CH}_2\text{Cl}_2$  (20 mL) was stirred at 0 °C for 18 h. Removal of the solvent and then concentration in vacuo gave crude 2,3,5,6-tetra-*O*-acetyl-D-galactofuranosyl chloride. A solution of the crude galactofuranosyl chloride, mercury (II) bromide (4.3 g, 11.93 mmol), mercury (II) cyanide (3.03 g, 11.99 mmol), and benzyl 2-hydroxymethylbenzoate (**18**) (2.91 g, 12.01 mmol) in acetonitrile (30 mL) was stirred at room temperature for 30 min, and the reaction mixture was filtered through Celite®, then the filtrate was concentrated. The resulting oil was dissolved in  $\text{CH}_2\text{Cl}_2$  (50 mL) and the solution was washed with saturated aqueous  $\text{NaHCO}_3$  ( $2 \times 50$  mL) and brine (50 mL). The organic layer was dried over  $\text{MgSO}_4$ , concentrated in vacuo, and the residue was purified by silica gel flash column chromatography (hexane/EtOAc, 3:1, v/v) to afford the title compound **9** (4.35 g, 7.60 mmol, 76%) as a colorless oil.:  $R_f = 0.35$  (hexane/EtOAc, 9:1, v/v); IR ( $\text{CHCl}_3$  film) 1225, 1370, 1747  $\text{cm}^{-1}$ ;  $[\alpha]_D^{20} -40.4$  ( $c$  1.3,  $\text{CHCl}_3$ );  $^1\text{H}$  NMR (250 MHz,  $\text{CDCl}_3$ )  $\delta$  2.02 (s, 3 H), 2.08 (s, 3 H), 2.10 (s, 3 H), 2.13 (s, 3 H), 4.20 (dd,  $J = 7.1, 11.8$  Hz, 1 H), 4.28–4.35 (m, 2 H), 4.99 and 5.15 (ABq,  $J = 14.5$  Hz, 2 H), 5.05 (dd,  $J = 1.5, 5.8$  Hz, 1 H), 5.18–5.20 (m, 2 H), 5.33 (s, 2 H), 5.38–5.44 (m, 1 H), 7.30–7.56 (m, 7 H), 7.67 (d,  $J = 7.7$  Hz, 1 H), 8.00 (d,  $J = 7.8$  Hz, 1 H);  $^{13}\text{C}$  NMR (63 MHz,  $\text{CDCl}_3$ )  $\delta$  20.5(2), 20.6, 20.7, 62.5, 66.6, 67.2, 69.2, 76.5, 80.2, 81.1, 105.2, 127.1, 127.6, 127.9, 128.0, 128.1, 128.5, 130.5, 132.3, 135.8, 139.7, 166.3, 169.4, 169.8, 169.9, 170.3.

Anal. calcd for C<sub>29</sub>H<sub>32</sub>O<sub>12</sub>: C, 60.83; H, 5.63. Found: C, 60.87; H, 5.55.

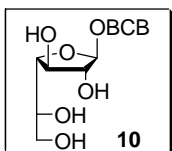

**2'-(Benzyloxycarbonyl)benzyl β-D-galactofuranoside (10).** To a solution of compound **9** (4.4 g, 7.68 mmol) in MeOH (100 mL) was added NaOMe (54 mg, 1.0 mmol) at 0 °C. After stirring at room temperature for 30 min, the reaction mixture was neutralized with DOWEX CCR-3 (H<sup>+</sup> mode), filtered through Celite®, and concentrated in vacuo. The residue was purified by silica gel flash column chromatography (CHCl<sub>3</sub>/MeOH, 9:1, v/v) to afford the title compound **10** (2.86 g, 7.07 mmol, 92%) as a white solid.: m.p.= 77–78 °C; R<sub>f</sub> = 0.35 (CHCl<sub>3</sub>/MeOH, 9:1, v/v); IR (CHCl<sub>3</sub> film) 1258, 1711, 3376 cm<sup>-1</sup>; [α]<sub>D</sub><sup>20</sup> –75.1 (c 2.6, CHCl<sub>3</sub>); <sup>1</sup>H NMR (250 MHz, CD<sub>3</sub>OD) δ 3.59–3.62 (m, 2 H), 3.71–3.74 (m, 1 H), 3.97–4.07 (m, 3 H), 4.90 and 5.08 (ABq, *J* = 14.1 Hz, 2 H), 5.00 (brs, 1 H), 5.33 (s, 2 H), 7.30–7.58 (m, 7 H), 7.70 (d, *J* = 7.4 Hz, 1 H), 7.92 (dd, *J* = 1.2, 7.8 Hz, 1 H); <sup>13</sup>C NMR (63 MHz, CD<sub>3</sub>OD) δ 64.5, 67.8, 68.6, 72.3, 78.8, 83.5, 84.4, 109.3, 128.3, 129.3, 129.35, 129.6, 131.3, 133.4, 137.5, 141.5, 168.3. Anal. calcd for C<sub>21</sub>H<sub>24</sub>O<sub>8</sub>: C, 62.37; H, 5.98. Found: C, 62.30; H, 5.98.

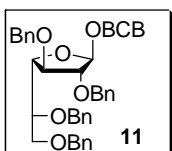

**2'-(Benzyloxycarbonyl)benzyl 2,3,5,6-tetra-*O*-benzyl-β-D-galactofuranoside (11).** To a solution of **10** (615 mg, 1.52 mmol) and BnBr (815 μL, 6.85 mmol) in DMF (10 mL) was added NaH (60%,

274 mg, 6.85 mmol) at 0 °C and then the ice bath was removed. After stirring at room temperature for 1 h, the reaction mixture was quenched with water (10 mL) and extracted with EtOAc (2 × 50 mL). The combined organic layer was washed with saturated aqueous NH<sub>4</sub>Cl (50 mL) and brine (50 mL), dried (MgSO<sub>4</sub>), and concentrated in vacuo. The residue was purified by silica gel flash column chromatography (hexane/EtOAc, 7:1, v/v) to afford the title compound **11** (977 mg, 1.28 mmol, 84%) as a colorless oil.: *R*<sub>f</sub> = 0.55 (hexane/EtOAc, 3:1, v/v); IR (CHCl<sub>3</sub> film) 1258, 1712 cm<sup>-1</sup>; [α]<sub>D</sub><sup>20</sup> -60.5 (c 0.4, CHCl<sub>3</sub>); <sup>1</sup>H NMR (500 MHz, CDCl<sub>3</sub>) δ 3.62–3.70 (m, 2 H), 3.77–3.80 (m, 1 H), 4.05–4.07 (m, 1 H), 4.10 (brs 1 H), 4.17–4.19 (m, 1 H), 4.32 (d, *J* = 11.6 Hz, 1 H), 4.44–4.56 (m, 6 H), 4.72 (d, *J* = 11.6 Hz, 1 H), 4.97 and 5.11 (ABq, *J* = 14.3 Hz, 2 H), 5.20 (s, 1 H), 5.30 (s, 2 H), 7.21–7.48 (m, 27 H), 7.64 (d, *J* = 7.6 Hz, 1 H), 7.96 (d, *J* = 7.6 Hz, 1 H); <sup>13</sup>C NMR (125 MHz, CDCl<sub>3</sub>) δ 66.8, 67.5, 71.2, 71.9, 72.2, 73.4, 73.5, 76.5, 81.3, 83.0, 88.6, 105.9, 127.1, 127.7, 127.8, 127.9, 128.0, 128.2, 128.4, 128.7, 130.7, 132.4, 136.1, 137.8, 138.1, 138.5, 138.6, 140.7, 188.6. Anal. calcd for C<sub>49</sub>H<sub>48</sub>O<sub>8</sub>: C, 76.94; H, 6.33. Found: C, 76.92; H, 6.30.

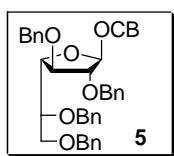

**2'-Carboxybenzyl 2,3,5,6-tetra-*O*-benzyl-β-D-galactofuranoside (5).** Compound **11** (670 mg, 0.88 mmol) was stirred under hydrogen atmosphere using a balloon in the presence of Pd/C (10%, 93 mg) and ammonium acetate (67 mg, 0.87 mmol) in MeOH–EtOAc (1:1 v/v, 10 mL) at room temperature for 1 h. The reaction mixture was filtered through Celite® and the filtrate was concentrated in vacuo. The residue was purified by silica gel flash column chromatography (hexane/EtOAc, 1:1, v/v) to afford the title compound **5** (564 mg, 0.84 mmol, 95%) as a colorless

oil.:  $R_f = 0.50$  (hexane/EtOAc, 1:1, v/v); IR (CHCl<sub>3</sub> film) 1695, 3157 cm<sup>-1</sup>;  $[\alpha]_D^{20} -71.5$  (*c* 0.4, CHCl<sub>3</sub>); <sup>1</sup>H NMR (500 MHz, CDCl<sub>3</sub>)  $\delta$  3.65–3.71 (m, 2 H), 3.77–3.82 (m, 1 H), 4.08–4.09 (m, 1 H), 4.14 (brs, 1 H), 4.23 (dd, *J* = 3.0, 6.9 Hz, 1 H), 4.33 (d, *J* = 11.7 Hz, 1 H), 4.45–4.49 (m, 4 H), 4.53 and 4.58 (ABq, *J* = 11.9 Hz, 2 H), 4.71 (d, *J* = 11.7 Hz, 1 H), 4.98 and 4.14 (ABq, *J* = 14.4 Hz, 2 H), 5.25 (s, 1 H), 7.21–7.31 (m, 21 H), 7.50 (t, *J* = 7.4 Hz, 1 H), 7.68 (d, *J* = 7.7 Hz, 1 H), 8.04 (d, *J* = 7.7 Hz, 1 H); <sup>13</sup>C NMR (125 MHz, CDCl<sub>3</sub>)  $\delta$  67.5, 70.8, 71.9, 72.1, 73.3, 73.4, 76.3, 81.2, 82.9, 88.5, 105.9, 127.2, 127.6, 127.8, 127.9, 128.0, 128.1, 128.4, 131.5, 133.2, 137.7, 138.0, 138.3, 138.5, 141.3, 172.3. Anal. calcd for C<sub>42</sub>H<sub>42</sub>O<sub>8</sub>: C, 74.76; H, 6.27. Found: C, 74.76; H, 6.31.

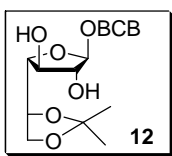

**2'-(Benzyloxycarbonyl)benzyl 5,6-*O*-isopropylidene- $\beta$ -D-galactofuranoside (12).** A solution of compound **10** (2.03 g, 5.02 mmol) and 2,2-dimethoxypropane (740  $\mu$ L, 6.02 mmol) in the presence of camphor sulfonic acid (12 mg, 0.05 mmol) in DMF (20 mL) was stirred at room temperature for 1 h. After quenched with triethylamine (1 mL), the reaction mixture was extracted with EtOAc (3  $\times$  50 mL). The combined organic layer was washed with saturated aqueous NH<sub>4</sub>Cl (2  $\times$  50 mL), brine (50 mL), dried over MgSO<sub>4</sub>, and concentrated in vacuo. The residue was purified by silica gel flash column chromatography (hexane/EtOAc, 1:3, v/v) to afford the title compound **12** (2.80 g, 70%) as a white solid.: m.p.= 62–63 °C;  $R_f = 0.48$  (hexane/EtOAc, 1:3, v/v); IR (CHCl<sub>3</sub> film) 1258, 1713, 3430 cm<sup>-1</sup>;  $[\alpha]_D^{20} -53.8$  (*c* 1.1, CHCl<sub>3</sub>); <sup>1</sup>H NMR (500 MHz, CDCl<sub>3</sub>)  $\delta$  1.41 (s, 3 H), 1.43 (s, 3 H), 3.18 (d, *J* = 11.6 Hz, 1 H), 4.01–4.14 (m, 6 H), 4.36 (t, *J* = 7.1 Hz, 1 H), 4.83 (d, *J* = 13.1 Hz, 1 H), 5.16–5.19 (m, 2 H), 5.31–5.37 (m, 2 H), 7.35–7.55 (m, 7 H), 8.00 (d, *J* = 7.7 Hz, 1 H); <sup>13</sup>C NMR

(125 MHz, CDCl<sub>3</sub>)  $\delta$  25.7, 25.8, 65.9, 67.0, 68.0, 75.9, 78.5, 78.9, 85.7, 108.6, 110.3, 127.9, 128.4, 128.5, 128.8, 129.0, 131.0, 132.7, 135.9, 139.4, 166.8. Anal. calcd for C<sub>24</sub>H<sub>28</sub>O<sub>8</sub>: C, 64.85; H, 6.35. Found: C, 64.90; H, 6.26.

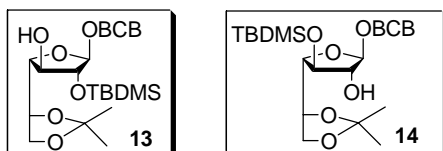

**2'-(Benzyloxycarbonyl)benzyl 2-*O*-*t*-butyldimethylsilyl-5,6-*O*-isopropylidene- $\beta$ -D-galactofuranoside (13) and 2'-(Benzyloxycarbonyl)benzyl 3-*O*-*t*-butyldimethylsilyl-5,6-*O*-isopropylidene- $\beta$ -D-galactofuranoside (14).** A solution of compound **12** (212 mg, 0.48 mmol), imidazole (97 mg, 1.42 mmol), and TBDMSCl (79 mg, 0.52 mmol) in DMF (4 mL) was stirred at room temperature for 4 h. The reaction mixture was quenched with saturated aqueous NH<sub>4</sub>Cl (5 mL), extracted with EtOAc (2  $\times$  30 mL). The combined organic layer was washed with saturated aqueous NH<sub>4</sub>Cl (2  $\times$  30 mL) and brine (30 mL), dried over MgSO<sub>4</sub>, and concentrated in vacuo. The residue was purified by silica gel flash column chromatography (hexane/EtOAc, 3:1, v/v) to afford the title compound **13** (220 mg, 0.43 mmol, 82 %) and compound **14** (21 mg, 0.04 mmol, 8%). Compound **13**: colorless oil,  $R_f$  = 0.35 (hexane/EtOAc, 3:1, v/v); IR (CHCl<sub>3</sub> film) 1255, 1717, 3484 cm<sup>-1</sup>;  $[\alpha]_D^{20}$  -53.4 ( $c$  0.9, CHCl<sub>3</sub>); <sup>1</sup>H NMR (500 MHz, CDCl<sub>3</sub>)  $\delta$  0.11 (s, 3 H), 0.13 (s, 3 H), 0.91 (s, 9 H), 1.40 (s, 3 H), 1.49 (s, 3 H), 3.05 (d,  $J$  = 10.2 Hz, 1 H), 3.72 (d,  $J$  = 9.7 Hz, 1 H), 3.91 (t,  $J$  = 7.3 Hz, 1 H), 4.04 (t,  $J$  = 7.6 Hz, 1 H), 4.14 (d,  $J$  = 5.3 Hz, 1 H), 4.17 (s, 1 H), 4.31–4.34 (m, 1 H), 4.88 and 5.20 (ABq,  $J$  = 13.2 Hz, 2 H), 5.11 (s, 1 H), 5.35 (s, 2 H), 7.33–7.56 (m, 8 H), 7.99 (d,  $J$  = 7.5 Hz, 1 H); <sup>13</sup>C NMR (125 MHz, CDCl<sub>3</sub>)  $\delta$  -4.9, 17.9, 25.2, 25.6, 26.7, 65.6, 66.7, 67.7, 76.4, 78.8, 81.3, 87.8, 107.9, 109.7, 127.5, 128.2, 128.6, 128.8, 130.7, 132.3, 135.8, 139.5, 166.6. Anal. calcd for

C<sub>30</sub>H<sub>42</sub>O<sub>8</sub>Si: C, 64.49; H, 7.58. Found: C, 64.41; H, 7.63. Compound **14**: colorless oil, *R<sub>f</sub>* = 0.43 (hexane/EtOAc, 3:1, v/v); IR (CHCl<sub>3</sub> film) 1255, 1717, 3438 cm<sup>-1</sup>; [α]<sub>D</sub><sup>20</sup> -50.0 (*c* 0.3, CHCl<sub>3</sub>); <sup>1</sup>H NMR (500 MHz, CDCl<sub>3</sub>) δ 0.12 (s, 3 H), 0.15 (s, 3 H), 0.92 (s, 9 H), 1.40 (s, 3 H), 1.42 (s, 3 H), 3.45 (d, *J* = 10.1 Hz, 1 H), 3.95–4.03 (m, 4 H), 4.12 (s, 1 H), 4.22 (t, *J* = 6.6 Hz, 1 H), 5.00 and 5.16 (ABq, *J* = 15.0 Hz, 2 H), 5.14 (s, 1 H), 5.33 (s, 2 H), 7.25–7.49 (m, 7 H), 7.82 (d, *J* = 7.7 Hz, 1 H), 7.99 (d, *J* = 7.6 Hz, 1 H); <sup>13</sup>C NMR (125 MHz, CDCl<sub>3</sub>) δ -4.8, -4.4, 18.1, 25.8, 65.8, 66.8, 67.5, 76.2, 79.9, 80.8, 85.2, 109.2, 110.0, 126.7, 127.6, 128.4, 128.7, 130.5, 132.5, 136.1, 141.6, 166.8. Anal. calcd for C<sub>30</sub>H<sub>42</sub>O<sub>8</sub>Si: C, 64.49; H, 7.58. Found: C, 64.43; H, 7.67.

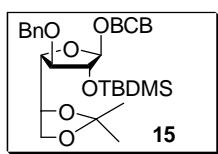

**2'-(Benzyloxycarbonyl)benzyl 3-O-benzyl-2-O-*t*-buthyldimethylsilyl-5,6-O-isopropylidene-β-D-galactofuranoside (15).** To a solution of **13** (400 mg, 0.716 mmol) and BnBr (103 μL, 0.866 mmol) in DMF (10 mL) was added NaH (60%, 35 mg, 0.875 mmol) at 0 °C and then the ice bath was removed. After stirring at room temperature for 1 h, the reaction mixture was quenched with water (10 mL) and extracted with EtOAc (2 × 50 mL). The combined organic layer was washed with saturated aqueous NH<sub>4</sub>Cl (50 mL) and brine (50 mL), dried (MgSO<sub>4</sub>), and concentrated in vacuo. The residue was purified by silica gel flash column chromatography (hexane/EtOAc, 9:1, v/v) to afford the title compound **15** (441 mg, 0.680 mmol, 95%) as a colorless oil.: *R<sub>f</sub>* = 0.25 (hexane/EtOAc, 9:1, v/v); IR (CHCl<sub>3</sub> film) 1282, 1728 cm<sup>-1</sup>; [α]<sub>D</sub><sup>20</sup> +40.7 (*c* 0.7, CHCl<sub>3</sub>); <sup>1</sup>H NMR (500 MHz, CDCl<sub>3</sub>) δ 0.13 (s, 3 H), 0.17 (s, 3 H), 0.95 (s, 9 H), 1.41 (s, 3 H), 1.46 (s, 3 H), 3.78 (d, *J* = 3.8 Hz, 1 H), 3.87–3.95 (m, 2 H), 4.20 (t, *J* = 5.5 Hz, 1 H), 4.29 (dd, *J* = 6.4, 12.9 Hz, 1 H), 4.43

(s, 1 H), 4.61 and 4.74 (ABq,  $J = 11.7$  Hz, 2 H), 5.08 (s, 1 H), 5.09 and 5.23 (ABq,  $J = 14.8$  Hz, 2 H), 5.38 (s, 2 H), 7.35–7.53 (m, 12 H), 7.78 (d,  $J = 7.6$  Hz, 1 H), 8.03 (d,  $J = 7.6$  Hz, 1 H);  $^{13}\text{C}$  NMR (125 MHz,  $\text{CDCl}_3$ )  $\delta$  -4.8, -4.6, 18.0, 25.3, 25.8, 26.6, 65.6, 66.7, 67.3, 72.2, 76.1, 81.1, 83.6, 86.3, 108.3, 109.7, 126.9, 127.8, 127.9, 128.3, 128.5, 128.7, 130.6, 132.4, 136.1, 137.9, 141.0, 166.7. Anal. calcd for  $\text{C}_{37}\text{H}_{48}\text{O}_8\text{Si}$ : C, 68.49; H, 7.46. Found: C, 68.43; H, 7.54.

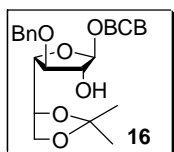

**2'-(Benzyloxycarbonyl)benzyl 3-O-benzyl-5,6-O-isopropylidene- $\beta$ -D-galactofuranoside (16).** A solution of compound **15** (420 mg, 0.647 mmol) and  $\text{Bu}_4\text{NF}$  (1.0M, 1 mL, 1 mmol) in THF (3 mL) was stirred at room temperature for 1 h. The reaction mixture was concentrated in vacuo. The residue was purified by silica gel flash column chromatography (hexane/EtOAc, 3:1, v/v) to afford the title compound **16** (339 mg, 0.634 mmol, 98 %) as a colorless oil.:  $R_f = 0.25$  (hexane/EtOAc, 3:1, v/v); IR ( $\text{CHCl}_3$  film) 1260, 1714, 3434  $\text{cm}^{-1}$ ;  $[\alpha]_{\text{D}}^{20} -72.8$  ( $c$  1.2,  $\text{CHCl}_3$ );  $^1\text{H}$  NMR (250 MHz,  $\text{CDCl}_3$ )  $\delta$  1.36 (s, 3 H), 1.41 (s, 3 H), 3.64 (d,  $J = 10.1$  Hz, 1 H), 3.92–3.96 (m, 3 H), 4.15–4.20 (m, 2 H), 4.29 (d,  $J = 10.0$  Hz, 1 H), 4.54 and 4.70 (ABq,  $J = 11.8$  Hz, 2 H), 4.99 and 5.18 (ABq,  $J = 14.8$  Hz, 2 H), 5.16 (s, 1 H), 5.30 (s, 2 H), 7.23–7.42 (m, 12 H), 7.72 (d,  $J = 7.7$  Hz, 1 H), 7.96 (d,  $J = 7.7$  Hz, 1 H);  $^{13}\text{C}$  NMR (63 MHz,  $\text{CDCl}_3$ )  $\delta$  25.7, 25.8, 65.5, 66.6, 67.3, 71.9, 76.3, 77.4, 82.8, 86.0, 108.8, 109.8, 126.7, 127.6, 127.8, 128.2, 128.4, 128.6, 130.4, 132.4, 135.9, 137.7, 141.0, 166.7. Anal. calcd for  $\text{C}_{31}\text{H}_{34}\text{O}_8$ : C, 69.65; H, 6.41. Found: C, 69.59; H, 6.22.

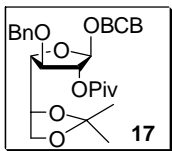

**2'-(Benzyloxycarbonyl)benzyl 3-O-benzyl-5,6-O-isopropylidene-2-O-pivaloyl- $\beta$ -D-galactofuranoside (17).** To a solution of compound **16** (3.4 g, 6.36 mmol) and Et<sub>3</sub>N (1.8 mL) in CH<sub>2</sub>Cl<sub>2</sub> (10 mL) were added pivaloyl chloride (940  $\mu$ L, 7.63 mmol) and DMAP (233 mg, 1.91 mmol). After stirring at room temperature for 1 h, the reaction mixture was quenched with aqueous NH<sub>4</sub>Cl (5 mL) and extracted with CH<sub>2</sub>Cl<sub>2</sub> (2  $\times$  30 mL). The combined organic layer was washed with saturated aqueous NaHCO<sub>3</sub> (2  $\times$  30 mL) and brine (50 mL), dried over MgSO<sub>4</sub>, and concentrated in vacuo. The residue was purified by silica gel flash column chromatography (hexane/EtOAc, 3:1, v/v) to afford the title compound **17** (3.89 g, 6.29 mmol, 99 %) as a colorless oil.:  $R_f$  = 0.53 (hexane/EtOAc, 3:1, v/v); IR (CHCl<sub>3</sub> film) 1262, 1728 cm<sup>-1</sup>; [ $\alpha$ ]<sub>D</sub><sup>20</sup> -89.8 (c 2.1, CHCl<sub>3</sub>); <sup>1</sup>H NMR (250 MHz, CDCl<sub>3</sub>)  $\delta$  1.22 (s, 9 H), 1.34 (s, 3 H), 1.39 (s, 3 H), 3.72–3.86 (m, 3 H), 4.14–4.22 (m, 2 H), 4.56 and 4.82 (ABq,  $J$  = 11.9 Hz, 2 H), 5.06 and 5.19 (ABq,  $J$  = 14.7 Hz, 2 H), 5.17 (s, 1 H), 5.28 (s, 1 H), 5.31 (s, 2 H), 7.24–7.52 (m, 12 H), 7.73 (d,  $J$  = 7.7 Hz, 1 H), 7.98 (d,  $J$  = 7.7 Hz, 1 H); <sup>13</sup>C NMR (63 MHz, CDCl<sub>3</sub>)  $\delta$  25.4, 26.4, 27.0, 38.7, 65.4, 66.7, 67.2, 72.1, 75.8, 80.6, 83.6, 83.7, 105.9, 109.8, 126.9, 127.6, 127.8, 127.9, 128.2, 128.4, 128.6, 130.5, 132.5, 136.0, 137.4, 140.5, 166.6, 177.4. Anal. calcd for C<sub>36</sub>H<sub>42</sub>O<sub>9</sub>: C, 69.88; H, 6.84. Found: C, 69.84; H, 6.76.

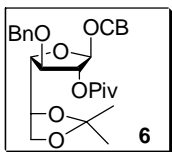

**2'-Carboxybenzyl 3-O-benzyl-5,6-O-isopropylidene-2-O-pivaloyl- $\beta$ -D-galactofuranoside (6).**

Compound **17** (1.655 g, 2.67 mmol) was stirred under hydrogen atmosphere using a balloon in the presence of Pd/C (10%, 284 mg) and ammonium acetate (206 mg, 2.67 mmol) in MeOH–EtOAc (1:1 v/v, 10 mL) at room temperature for 1 h. The reaction mixture was filtered through Celite® and the filtrate was concentrated in vacuo. The residue was purified by silica gel flash column chromatography (hexane/EtOAc, 1:1, v/v) to afford the title compound **6** (1.38 g, 2.61 mmol, 98%) as a colorless oil.:  $R_f = 0.45$  (hexane/EtOAc, 1:1, v/v); IR (CHCl<sub>3</sub> film) 1694, 1732, 3172 cm<sup>-1</sup>;  $[\alpha]_D^{20} -9.4$  (c 4, CHCl<sub>3</sub>); <sup>1</sup>H NMR (250 MHz, CDCl<sub>3</sub>)  $\delta$  1.23 (s, 9 H), 1.35 (s, 3 H), 1.41 (s, 3 H), 3.75–3.85 (m, 3 H), 4.18–4.25 (m, 2 H), 4.58 and 4.84 (ABq,  $J = 11.9$  Hz, 2 H), 5.08 and 5.25 (ABq,  $J = 15.1$  Hz, 2 H), 5.24 (s, 1 H), 5.31 (s, 1 H), 7.25–7.35 (m, 6 H), 7.56 (t,  $J = 7.5$  Hz, 1 H), 7.80 (d,  $J = 7.7$  Hz, 1 H), 7.98 (d,  $J = 7.7$  Hz, 1 H), 12.0 (brs, 1H); <sup>13</sup>C NMR (63 MHz, CDCl<sub>3</sub>) 25.3, 26.4, 27.0, 38.6, 65.4, 67.2, 72.0, 75.8, 80.5, 83.5, 83.7, 105.9, 109.8, 126.6, 126.9, 127.3, 127.9, 128.2, 128.3, 131.3, 133.3, 137.3, 141.3, 172.1, 166.4. Anal. calcd for C<sub>29</sub>H<sub>36</sub>O<sub>9</sub>: C, 65.89; H, 6.86. Found: C, 65.86; H, 6.85.

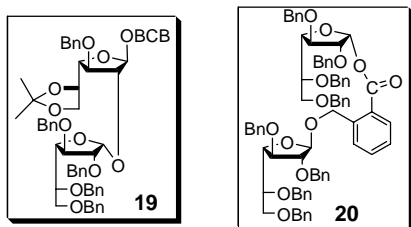

**2'-(Benzyloxycarbonyl)benzyl (2,3,5,6-tetra-*O*-benzyl- $\alpha$ -D-galactofuranosyl)-(1→2) 3-*O*-benzyl-5,6-*O*-isopropylidene- $\beta$ -D-galactofuranoside (19).**

**Method A:** A solution of donor **5** (94 mg, 0.139 mmol), acceptor **16** (111 mg, 0.208 mmol) and DTBMP (86 mg, 0.419 mmol) in CH<sub>2</sub>Cl<sub>2</sub> (10 mL) in the presence of 4Å molecular sieves was stirred for 10 min at room temperature and cooled to -78 °C. To the resulting solution was added a

solution of  $\text{TiF}_4$  (35  $\mu\text{L}$ , 0.208 mmol) in  $\text{CH}_2\text{Cl}_2$  (1 mL), and stirred at  $-78\text{ }^\circ\text{C}$  for 1 h. The reaction mixture was allowed to warm to  $0\text{ }^\circ\text{C}$  over 1 h, quenched with saturated aqueous  $\text{NaHCO}_3$  (1 mL), and diluted with  $\text{CH}_2\text{Cl}_2$  (50 mL). The organic layer was washed with saturated aqueous  $\text{NaHCO}_3$  ( $2 \times 30\text{ mL}$ ) and brine (50 mL), dried over  $\text{MgSO}_4$ , and concentrated in vacuo. The residue was purified by flash column chromatography (hexane/EtOAc, 3:1, v/v) to afford the title compound **19** (100 mg, 0.095 mmol, 68 %,  **$\alpha$  only**) as a colorless oil and self-condensed ester **20** (20 mg, 0.033 mmol, 24%) as a colorless oil. Compound **19**:  $R_f = 0.48$  (hexane/EtOAc, 3:1, v/v);  $^1\text{H}$  NMR (250 MHz,  $\text{CDCl}_3$ )  $\delta$  1.33 (s, 3 H), 1.39 (s, 3 H), 3.60–3.64 (m, 2 H), 3.68–3.71 (m, 1 H), 3.75–3.79 (m, 2 H), 3.83–3.87 (m, 1 H), 3.97 (dd,  $J = 3.6, 7.6\text{ Hz}$ , 1 H), 4.04–4.09 (m, 2 H), 4.17 (t,  $J = 6.8\text{ Hz}$ , 1 H), 4.26 (d,  $J = 11.7\text{ Hz}$ , 1 H), 4.36–4.50 (m, 7 H), 4.57 (d,  $J = 3.7\text{ Hz}$ , 1 H), 4.61–4.64 (m, 1 H), 4.69 (brs, 1 H), 4.71 (d,  $J = 12.2\text{ Hz}$ , 1 H), 5.03 (d,  $J = 14.3\text{ Hz}$ , 1 H), 5.09 (d,  $J = 4.5\text{ Hz}$ , 1 H), 5.15 (d,  $J = 13.4\text{ Hz}$ , 1 H), 5.18 (brs, 1 H), 5.31 (s, 2 H), 7.16–7.44 (m, 32 H), 7.66 (d,  $J = 7.7\text{ Hz}$ , 1 H), 7.97 (d,  $J = 7.7\text{ Hz}$ , 1 H);  $^{13}\text{C}$  NMR (63 MHz,  $\text{CDCl}_3$ )  $\delta$  25.5, 26.7, 65.5, 66.7, 67.5, 70.7, 72.1, 72.4(2), 73.2, 73.5, 77.4, 79.6, 80.2, 83.5, 83.7, 84.6, 84.8, 99.0, 105.7, 109.7, 127.1, 127.57, 127.6, 127.7, 127.77, 127.8, 127.9, 128.0, 128.2, 128.25, 128.3, 128.36, 128.4, 128.5, 128.6, 128.7, 130.6, 132.4, 136.1, 137.6, 138.1, 138.2, 138.5, 140.6, 166.7. Compound **20**:  $R_f = 0.5$  (hexane/EtOAc, 3:1, v/v);  $^1\text{H}$  NMR (500 MHz,  $\text{CDCl}_3$ )  $\delta$  3.63–3.69 (m, 4 H), 3.76–3.79 (m, 1 H), 3.80–3.84 (m, 1 H), 4.05–4.06 (m, 1 H), 4.09–4.15 (m, 3 H), 4.18–4.20 (m, 1 H), 4.31–4.34 (m, 2 H), 4.39–4.59 (m, 12 H), 4.66 (d,  $J = 11.9\text{ Hz}$ , 1 H), 4.70–4.75 (m, 2 H), 5.01 and 5.12 (ABq,  $J = 14.7\text{ Hz}$ , 2 H), 5.22 (brs, 1 H), 6.48 (brs, 1 H), 7.20–7.31 (m, 41 H), 7.48 (t,  $J = 7.3\text{ Hz}$ , 1 H), 7.67 (d,  $J = 7.6\text{ Hz}$ , 1 H), 7.95 (d,  $J = 7.6\text{ Hz}$ , 1 H);  $^{13}\text{C}$  NMR (125 MHz,  $\text{CDCl}_3$ )  $\delta$  67.5, 70.8, 71.2, 72.0, 72.2, 73.4, 73.5, 76.6, 81.4, 83.0, 84.9, 87.0, 88.6, 100.7, 106.1, 127.0, 127.7, 128.0, 128.5, 131.2, 132.9. Anal. calcd for

C<sub>76</sub>H<sub>76</sub>O<sub>13</sub>: C, 76.23; H, 6.40. Found: C, 76.32; H, 6.32.

**Method B:** A solution of the acceptor **16** (116 mg, 0.217 mmol) and DTBMP (89 mg, 0.433 mmol) in CH<sub>2</sub>Cl<sub>2</sub> (10 mL) in the presence of 4Å molecular sieves was stirred for 10 min at room temperature and cooled to -78 °C. To the resulting solution was added a solution of Tf<sub>2</sub>O (37 µL, 0.220 mmol) in CH<sub>2</sub>Cl<sub>2</sub> (1 mL) and subsequently added dropwise a solution of donor **5** (98 mg, 0.145 mmol) in CH<sub>2</sub>Cl<sub>2</sub> (10 mL). After stirring at -78 °C for further 1 h, the reaction mixture was allowed to warm to 0 °C over 1 h, quenched with saturated aqueous NaHCO<sub>3</sub> (1 mL), and diluted with CH<sub>2</sub>Cl<sub>2</sub> (50 mL). The organic layer was washed with saturated aqueous NaHCO<sub>3</sub> (2 × 50 mL) and brine (50 mL), dried over MgSO<sub>4</sub>, and concentrated in vacuo. The residue was purified by flash column chromatography (hexanes/EtOAc, 3:1, v/v) to afford the title compound **19** (126 mg, 0.119 mmol, 82 %, **α only**).

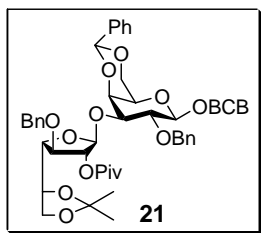

**2'-(Benzyloxycarbonyl)benzyl (3-O-benzyl-5,6-O-isopropylidene-2-O-pivaloyl-β-D-galactofuranosyl)-(1→3)-2-O-benzyl-4,6-O-benzylidene-β-D-galactopyranoside (21).** A solution of acceptor **7** (527 mg, 0.905 mmol) and DTBMP (667 mg, 3.248 mmol) in CH<sub>2</sub>Cl<sub>2</sub> (15 mL) in the presence of 4Å molecular sieves was stirred for 10 min at room temperature and cooled to -45 °C. To the resulting solution was added a solution of Tf<sub>2</sub>O (273 µL, 1.623 mmol) in CH<sub>2</sub>Cl<sub>2</sub> (3 mL) and subsequently added dropwise a solution of donor **6** (715 mg, 1.353 mmol) in CH<sub>2</sub>Cl<sub>2</sub> (10 mL). After stirring at -40 °C for further 1 h, the reaction mixture was allowed to warm to 0 °C over 1 h,

quenched with saturated aqueous NaHCO<sub>3</sub> (1 mL), and diluted with CH<sub>2</sub>Cl<sub>2</sub> (50 mL). The organic layer was washed with saturated aqueous NaHCO<sub>3</sub> (2 × 50 mL) and brine (50 mL), dried over MgSO<sub>4</sub>, and concentrated in vacuo. The residue was purified by silica gel flash column chromatography (hexane/EtOAc, 2:1, v/v) to afford the title compound **21** (682 mg, 0.711 mmol, 79%) as a white solid.: m.p.= 81–82 °C; R<sub>f</sub>= 0.18 (hexane/EtOAc, 3:1, v/v); IR (CHCl<sub>3</sub> film) 1258, 1374, 1459, 1717, 1736 cm<sup>-1</sup>; [α]<sub>D</sub> –33.1 (c 1.1, CHCl<sub>3</sub>); <sup>1</sup>H NMR (250 MHz, CDCl<sub>3</sub>) δ 1.20 (s, 9 H), 1.34 (s, 6 H), 3.41 (brs, 1 H), 3.60 (d, *J* = 5.9 Hz, 1 H), 3.67 (d, *J* = 7.8 Hz, 1 H), 3.72–3.83 (m, 2 H), 3.93–4.15 (m, 3 H), 4.24–4.37 (m, 2 H), 4.41 (d, *J* = 3.4 Hz, 1 H), 4.47 and 4.79 (ABq, *J* = 12.0 Hz, 2 H), 4.55 (d, *J* = 7.7 Hz, 1 H), 4.83 and 4.91 (ABq, *J* = 10.7 Hz, 2 H), 5.14 and 5.41 (ABq, *J* = 15.1 Hz, 2 H), 5.27–5.33 (m, 4 H), 5.59 (s, 1 H), 7.23–7.59 (m, 22 H), 7.83 (d, *J* = 7.7 Hz, 1 H), 8.01 (d, *J* = 7.6 Hz, 1 H); <sup>13</sup>C NMR (63 MHz, CDCl<sub>3</sub>) δ 25.5, 26.6, 27.1, 38.7, 65.5, 66.5, 66.7, 69.1, 72.0, 75.5, 76.4, 77.4, 76.5, 78.0, 79.4, 80.7, 83.5, 84.1, 100.8, 103.1, 108.5, 109.9, 126.3, 126.9, 127.4, 127.5, 127.6, 128.0, 128.1, 128.2, 128.3, 128.4, 128.5, 128.7, 130.6, 132.7, 136.0, 137.3, 137.9, 138.7, 140.9, 166.7, 177.1. Anal. calcd for C<sub>56</sub>H<sub>62</sub>O<sub>14</sub>: C, 70.13; H, 6.52. Found: C, 70.04; H, 6.51.

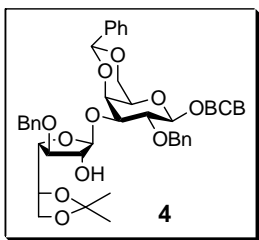

**2'-(Benzyloxycarbonyl)benzyl (3-O-benzyl-5,6-O-isopropylidene-β-D-galactofuranosyl)-(1→3)-2-O-benzyl-4,6-O-benzylidene-β-D-galactopyranoside (4).** A solution of benzyl alcohol (340 μL, 3.29 mmol) and sodium hydride (60%, 132 mg, 3.30 mmol) in THF (10 mL) was stirred at

0 °C for 30 min. To the solution was added a solution of **21** (2.11 g, 2.20 mmol) in THF (4 mL) and stirred at 0 °C for 1 h. The reaction mixture was quenched with water (2 mL), diluted with EtOAc (50 mL), washed with brine (50 mL), dried over MgSO<sub>4</sub>, and concentrated in vacuo. The residue was purified by flash column chromatography (hexane/EtOAc, 1:1, v/v) to afford the title compound **4** (1.58 g, 1.81 mmol, 82%) as a white solid.: m.p.= 47–48 °C; *R*<sub>f</sub> = 0.38 (hexane/EtOAc, 1:1, v/v); IR (CHCl<sub>3</sub> film) 3442, 1717, 1463, 1378, 1262 cm<sup>-1</sup>; [α]<sub>D</sub> -26.2 (*c* 0.5, CHCl<sub>3</sub>); <sup>1</sup>H NMR (250 MHz, CDCl<sub>3</sub>) δ 1.34 (s, 3 H), 1.37 (s, 3 H), 2.93 (brs, 1 H), 3.38 (brs, 1 H), 3.73–3.80 (m, 2 H), 3.83–3.98 (m, 3 H), 4.00–4.17 (m, 3 H), 4.19–4.24 (m, 1 H), 4.29–4.36 (m, 2 H), 4.47 and 4.65 (ABq, *J* = 11.9 Hz, 2 H), 4.55 (d, *J* = 7.7 Hz, 1 H), 4.73 and 4.92 (ABq, *J* = 11.2 Hz, 2 H), 5.11 and 5.40 (ABq, *J* = 14.9 Hz, 2 H), 5.27–5.29 (m, 3 H), 5.53 (s, 1 H), 7.16–7.55 (m, 22 H), 7.81 (d, *J* = 7.7 Hz, 1 H), 8.00 (dd, *J* = 1.0, 7.7 Hz, 1 H); <sup>13</sup>C NMR (63 MHz, CDCl<sub>3</sub>) δ 25.5, 26.1, 65.6, 66.6, 66.7, 69.1, 69.2, 71.9, 75.4, 76.5, 77.4, 78.4, 78.5, 79.2, 82.8, 86.3, 100.8, 103.1, 109.9, 111.1, 126.3, 126.9, 127.6, 127.7, 127.8, 128.0, 128.1, 128.27, 128.3, 128.4, 128.6, 132.6, 137.8, 138.0, 138.9, 140.8, 166.7. Anal. calcd for C<sub>51</sub>H<sub>54</sub>O<sub>13</sub>: C, 70.01; H, 6.22. Found: C, 70.06; H, 6.30.

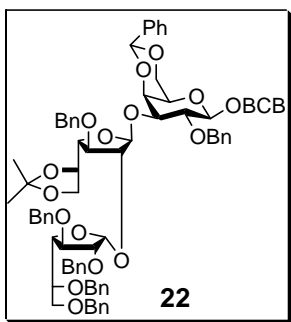

**2'-(Benzyloxycarbonyl)benzyl (2,3,5,6-tetra-*O*-benzyl- $\alpha$ -D-galactofuranosyl)-(1→2)-(3-*O*-benzyl-5,6-*O*-isopropylidene- $\beta$ -D-galactofuranosyl)-(1→3)-2-*O*-benzyl-4,6-*O*-benzylidene- $\beta$ -D-galactopyranoside (**22**).** A solution of acceptor **4** (93 mg, 0.106 mmol) and DTBMP (52 mg, 0.253

mmol) in CH<sub>2</sub>Cl<sub>2</sub> (10 mL) in the presence of 4Å molecular sieves was stirred for 10 min at room temperature and cooled to –78 °C. To the resulting solution were added a solution of Tf<sub>2</sub>O (22 µL, 0.131 mmol) in CH<sub>2</sub>Cl<sub>2</sub> (1 mL) and subsequently added dropwise a solution of donor **5** (71 mg, 0.105 mmol) in CH<sub>2</sub>Cl<sub>2</sub> (5 mL). After stirring at –78 °C for further 1 h, the reaction mixture was allowed to warm to 0 °C over 1 h, quenched with saturated aqueous NaHCO<sub>3</sub> (1 mL), and diluted with CH<sub>2</sub>Cl<sub>2</sub> (50 mL). The organic layer was washed with saturated aqueous NaHCO<sub>3</sub> (2 × 50 mL) and brine (50 mL), dried over MgSO<sub>4</sub>, and concentrated in vacuo. The residue was purified by flash column chromatography (hexane/EtOAc, 2:1, v/v) to afford the title compound **22** (134 mg, 0.096 mmol, 91%) as a white solid.: m.p.= 43–44 °C; R<sub>f</sub> = 0.3 (hexane/EtOAc, 2:1, v/v); IR (CHCl<sub>3</sub> film) 1713, 1497, 1368, 1261 cm<sup>–1</sup>; [α]<sub>D</sub> +22.1 (c 0.8, CHCl<sub>3</sub>); <sup>1</sup>H NMR (250 MHz, CDCl<sub>3</sub>) δ 1.34 (s, 6 H), 3.42 (brs, 1 H), 3.64–3.86 (m, 8 H), 3.91–4.02 (m, 2 H), 4.06–4.24 (m, 5 H), 4.31–4.41 (m, 8 H), 4.53–4.59 (m, 3 H), 4.64–4.70 (m, 2 H), 4.73 (d, *J* = 4.8 Hz, 1 H), 4.92 (d, *J* = 4.6 Hz, 1 H), 4.99 (d, *J* = 10.8 Hz, 1 H), 5.16 and 5.42 (ABq, *J* = 15.0 Hz, 2 H), 5.26 (brs, 1 H), 5.30 (s, 2 H), 5.58 (s, 1 H), 7.20–7.55 (m, 42 H), 7.82 (d, *J* = 7.8 Hz, 1 H), 8.02 (dd, *J* = 1.1, 7.8 Hz, 1 H); <sup>13</sup>C NMR (63 MHz, CDCl<sub>3</sub>) δ 25.5, 26.8, 65.4, 66.6, 66.7(2), 69.1, 70.7, 71.8, 72.1, 72.4, 73.2, 73.5, 75.3, 76.5, 77.0, 77.4, 78.0, 79.2, 79.3, 80.0, 82.8, 83.8, 84.5, 85.0, 98.5, 100.9, 103.2, 108.4, 109.7, 126.3, 126.9, 127.4, 127.5, 127.6, 127.7, 127.8, 127.87, 127.9, 128.0, 128.1, 128.2, 128.3, 128.4, 128.5, 128.6, 130.7, 132.6, 136.0, 137.6, 137.9, 138.1, 138.2, 138.3, 138.8, 140.8, 166.6. Anal. calcd for C<sub>85</sub>H<sub>88</sub>O<sub>18</sub>: C, 73.05; H, 6.35. Found: C, 73.12; H, 6.22.

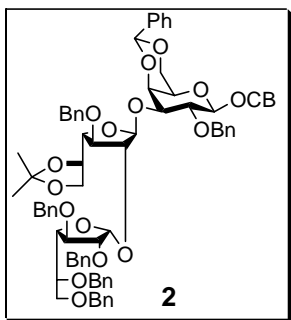

**2'-Carboxybenzyl (2,3,5,6-tetra-*O*-benzyl- $\alpha$ -D-galactofuranosyl)-(1 $\rightarrow$ 2)-(3-*O*-benzyl-5,6-*O*-isopropylidene- $\beta$ -D-galactofuranosyl)-(1 $\rightarrow$ 3)-2-*O*-benzyl-4,6-*O*-benzylidene- $\beta$ -D-**

**galactopyranoside (2).** Compound **22** (127 mg, 0.91 mmol) was stirred under hydrogen atmosphere using a balloon in the presence of Pd/C (10%, 10 mg) and ammonium acetate (7 mg, 0.091 mmol) in MeOH–EtOAc (1:1, v/v, 5 mL) at room temperature for 1 h. The reaction mixture was filtered through Celite® and the filtrate was concentrated in vacuo. The residue was purified by flash column chromatography (hexane/EtOAc, 1:2, v/v) to afford the title compound **2** (112 mg, 0.086 mmol, 95%) as a white solid.: m.p.= 48–49 °C;  $R_f$  = 0.3 (hexane/EtOAc, 1:2, v/v); IR (CHCl<sub>3</sub> film) 3306, 1715, 1499, 1457, 1376 cm<sup>-1</sup>;  $[\alpha]_D$  +23.8 (*c* 1.0, CHCl<sub>3</sub>); <sup>1</sup>H NMR (250 MHz, CDCl<sub>3</sub>)  $\delta$  1.34 (s, 6 H), 3.48 (brs, 1 H), 3.62–3.86 (m, 8 H), 3.94–4.02 (m, 3 H), 4.07–4.20 (m, 3 H), 4.21–4.24 (m, 1 H), 4.36–4.48 (m, 8 H), 4.54–4.72 (m, 5 H), 4.76 and 5.03 (ABq, *J* = 10.8 Hz, 2 H), 4.92 (d, *J* = 4.5 Hz, 1 H), 5.22 and 5.43 (ABq, *J* = 15.5 Hz, 2 H), 5.27 (brs, 1 H), 5.59 (s, 1 H), 7.20–7.56 (m, 37 H), 7.87 (d, *J* = 7.8 Hz, 1 H), 8.07 (d, *J* = 7.7 Hz, 1 H), 9.77 (brs, 1 H); <sup>13</sup>C NMR (63 MHz, CDCl<sub>3</sub>)  $\delta$  25.6, 26.8, 65.4, 66.6, 69.1(2), 70.7, 71.9, 72.2, 72.4, 73.3, 73.5(2), 75.4, 76.5, 77.0, 78.1, 79.3(2), 80.0, 82.8, 83.8, 84.5, 85.0, 98.5, 100.9, 103.1, 108.4, 109.8, 126.3, 126.6, 127.0, 127.5, 127.6, 127.68, 127.7, 127.8, 127.9, 127.97, 128.0, 128.1, 128.27, 128.3, 128.36, 128.4, 128.5, 128.7, 131.5, 133.4, 137.7, 138.0, 138.15, 138.2, 138.4, 138.8, 141.5, 171.8. Anal. calcd for C<sub>78</sub>H<sub>82</sub>O<sub>18</sub>: C, 71.65; H, 6.32. Found: C, 71.60; H, 6.45.

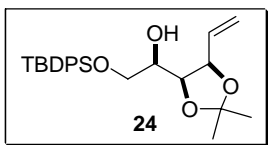

**(2R,3S,4R)-1-O-*t*-Butyldiphenylsilyl-3,4-O-isopropylidene-5-hexene-1,2,3,4-tetrol (24).** To a suspension of trimethylphosphonium bromide (6.0 g, 16.8 mmol) in THF (50 mL) was added dropwise *n*-BuLi (1.6 M, 10.5 mL, 16.8 mmol) at 0 °C, and the mixture was stirred at 0 °C for 30 min. To this mixture was added dropwise a solution of **23** (2.3 g, 5.37 mmol) in THF (20 mL) at 0 °C, and allowed to warm to room temperature, then stirred for 1 h. After the reaction mixture was quenched with methanol, it was dissolved in 80% aqueous methanol and extracted with *n*-hexane (100 mL), washed with brine (2 × 50 mL) and then concentrated. The residue was purified by silica gel flash column chromatography (hexane/EtOAc, 4:1, v/v) to afford the title compound **24** (2.06 g, 4.83 mmol, 90%) as a colorless oil.:  $R_f$  = 0.53 (hexane/EtOAc, 4:1, v/v); IR (CHCl<sub>3</sub> film) 1111, 1429, 3467 cm<sup>-1</sup>;  $[\alpha]_D^{20}$  -15.0 (*c* 1.0, CHCl<sub>3</sub>); <sup>1</sup>H NMR (250 MHz, CDCl<sub>3</sub>) δ 1.06 (s, 9 H), 1.39 (s, 3 H), 1.51 (s, 3 H), 2.43 (d, *J* = 6.2 Hz, 1 H), 3.63–3.72 (m, 3 H), 4.30 (dd, *J* = 3.6, 6.9 Hz, 1 H), 4.50 (t, *J* = 7.5 Hz, 1 H), 5.18 (brs, 1 H), 5.23 (dd, *J* = 0.8, 6.9 Hz, 1 H), 5.88–6.03 (m, 1 H), 7.34–7.68 (m, 10 H); <sup>13</sup>C NMR (63 MHz, CDCl<sub>3</sub>) δ 19.4, 25.1, 27.0, 27.4, 65.0, 70.1, 77.3, 79.2, 108.8, 119.5, 127.86, 127.9, 129.9, 130.0, 133.3, 134.5, 135.7. Anal. calcd for C<sub>25</sub>H<sub>34</sub>O<sub>4</sub>Si: C, 70.38; H, 8.03. Found: C, 70.24; H, 8.38.

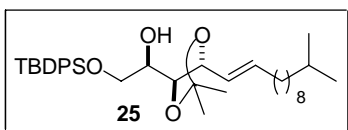

**(2R,3S,4R)-1-O-*t*-Butyldiphenylsilyl-3,4-O-isopropylidene-5-hexadecene-15-methyl-1,2,3,4-**

**tetrol (25).** To a solution of **24** (320 mg, 0.75 mmol) and 11-methyl-dodec-1-ene (**39**) (1.37 g, 7.51 mmol) in CH<sub>2</sub>Cl<sub>2</sub> (25 mL) was added the Grubbs generation II catalyst **41** (127 mg, 0.15 mmol). The reaction mixture was stirred at reflux for 24 h, concentrated and directly purified by silica gel flash column chromatography (hexane/EtOAc, 9:1, v/v) to afford the title compound **25** (327 mg, 0.56 mmol, 75%) as a colorless oil.: *R*<sub>f</sub> = 0.45 (hexane/EtOAc, 9:1, v/v); IR (CHCl<sub>3</sub> film) 1112, 3483 cm<sup>-1</sup>; [*α*]<sub>D</sub><sup>20</sup> -3.9 (*c* 0.9, CHCl<sub>3</sub>); <sup>1</sup>H NMR (500 MHz, CDCl<sub>3</sub>) δ 0.86 (s, 3 H), 0.87 (s, 3 H), 1.07 (s, 9 H), 1.15–1.35 (m, 15 H), 1.38 (s, 3 H), 1.50 (s, 3 H), 2.00–2.02 (m, 2 H), 2.42 (d, *J* = 4.5 Hz, 1 H), 3.65–3.70 (m, 3 H), 4.26 (dd, *J* = 2.2, 6.2 Hz, 1 H), 4.51 (t, *J* = 7.3 Hz, 1 H), 5.58–5.70 (m, 2 H), 7.36–7.67 (m, 10 H); <sup>13</sup>C NMR (125 MHz, CDCl<sub>3</sub>) δ 19.4, 22.8, 25.0, 27.0, 27.3, 27.5, 28.1, 29.1, 29.3, 29.6, 29.7, 30.0, 32.3, 39.1, 65.0, 70.2, 77.2, 79.1, 108.3, 125.7, 127.8, 129.9, 133.3, 135.7, 137.4. Anal. calcd for C<sub>36</sub>H<sub>56</sub>O<sub>4</sub>Si: C, 74.43; H, 9.72. Found: C, 74.69; H, 9.94.

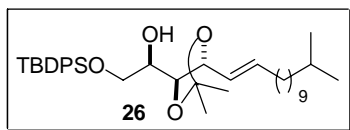

**(2*R*,3*S*,4*R*)-1-*O*-*t*-Buthyldiphenylsilyl-3,4-*O*-isopropylidene-5-heptadecene-16-methyl-1,2,3,4-tetrol (26).** The title compound **26** was prepared from compound **24** (180 mg, 0.42 mmol) in the same procedure as described for **25**: 190 mg (0.319 mmol, 76%); colorless oil; *R*<sub>f</sub> = 0.45 (hexane/EtOAc, 9:1, v/v); IR (CHCl<sub>3</sub> film) 1111, 3421 cm<sup>-1</sup>; [*α*]<sub>D</sub><sup>20</sup> -2.8 (*c* 0.9, CHCl<sub>3</sub>); <sup>1</sup>H NMR (250 MHz, CDCl<sub>3</sub>) δ 0.85 (s, 3 H), 0.87 (s, 3 H), 1.06 (s, 9 H), 1.13–1.35 (m, 14 H), 1.38 (s, 3 H), 1.50 (s, 3 H), 1.53–1.61 (m, 3 H), 1.97–2.04 (m, 2 H), 2.42 (brs, 1 H), 3.62–3.71 (m, 3 H), 4.23–4.27 (m, 1 H), 4.50 (t, *J* = 7.3 Hz, 1 H), 5.54–5.73 (m, 2 H), 7.34–7.68 (m, 10 H); <sup>13</sup>C NMR (63 MHz, CDCl<sub>3</sub>) δ 19.4, 22.8, 25.1, 27.0, 27.4, 27.6, 28.1, 29.1, 29.4, 29.6, 29.8, 29.9, 30.1, 32.4,

39.2, 65.0, 70.2, 77.3, 79.1, 108.4, 125.7, 127.86, 127.9, 129.94, 133.4, 135.7, 137.5. Anal. calcd for C<sub>37</sub>H<sub>58</sub>O<sub>4</sub>Si: C, 74.70; H, 9.83. Found: C, 74.33; H, 9.99.

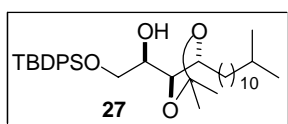

**(2R,3S,4R)-1-O-*t*-Butyldiphenylsilyl-3,4-O-isopropylidene-15-methyl-1,2,3,4-**

**hexadecanetetrol (27).** Compound **25** (236 mg, 0.406 mmol) was stirred under hydrogen atmosphere using a balloon in the presence of Pd(OH)<sub>2</sub> (20%, 150 mg) in EtOAc (10 mL) at room temperature for 1.5 h. The reaction mixture was filtered through Celite and the filtrate was concentrated in vacuo. The residue was purified by silica gel flash column chromatography (hexane/EtOAc, 9:1, v/v) to afford the title compound **27** (225 mg, 0.386 mmol, 95%) as a colorless oil.:  $R_f = 0.50$  (hexane/EtOAc, 9:1, v/v); IR (CHCl<sub>3</sub> film) 1112, 3416 cm<sup>-1</sup>;  $[\alpha]_D^{20} -10.8$  ( $c$  0.6, CHCl<sub>3</sub>); <sup>1</sup>H NMR (500 MHz, CDCl<sub>3</sub>)  $\delta$  0.86 (s, 3 H), 0.87 (s, 3 H), 1.07 (s, 9 H), 1.15–1.36 (m, 18 H), 1.36 (s, 3 H), 1.47 (s, 3 H), 1.49–1.72 (m, 3 H), 2.35 (brs, 1 H), 3.66–3.71 (m, 3 H), 4.09–4.18 (m, 2 H), 7.36–7.67 (m, 10 H); <sup>13</sup>C NMR (125 MHz, CDCl<sub>3</sub>)  $\delta$  25.3, 27.0(m), 27.4, 27.5, 28.1, 29.8(m), 30.0, 30.1, 39.2, 65.4, 70.0, 76.6, 77.6, 107.8, 127.9, 129.9, 133.4, 135.7. Anal. calcd for C<sub>36</sub>H<sub>58</sub>O<sub>4</sub>Si: C, 74.17; H, 10.03. Found: C, 74.12; H, 10.32.

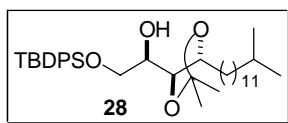

**(2R,3S,4R)-1-O-*t*-Butyldiphenylsilyl-3,4-O-isopropylidene-16-methyl-1,2,3,4-**

**heptadecanetetrol (28).** The title compound **28** was prepared from compound **26** (422 mg, 0.709

mmol) in the same procedure as described for **27**: 398 mg (0.667 mmol, 94%); colorless oil;  $R_f$  = 0.35 (hexane/EtOAc, 9:1, v/v); IR (CHCl<sub>3</sub> film) 1111, 3421 cm<sup>-1</sup>;  $[\alpha]_D^{20}$  -8.6 (*c* 0.7, CHCl<sub>3</sub>); <sup>1</sup>H NMR (500 MHz, CDCl<sub>3</sub>)  $\delta$  0.86 (s, 3 H), 0.87 (s, 3 H), 1.07 (s, 9 H), 1.15–1.32 (m, 20 H), 1.36 (s, 3 H), 1.46 (s, 3 H), 1.49–1.53 (m, 2 H), 1.71–1.78 (m, 1 H), 2.35 (brs, 1 H), 3.67–3.71 (m, 3 H), 4.09–4.14 (m, 1 H), 4.16–4.21 (m, 1 H), 7.36–7.68 (m, 10 H); <sup>13</sup>C NMR (125 MHz, CDCl<sub>3</sub>)  $\delta$  19.4, 22.8, 25.3, 27.0, 27.4, 27.5, 28.1, 29.8, 30.0, 30.1, 39.2, 65.4, 70.0, 76.6, 77.6, 107.8, 127.9, 129.9, 133.4, 135.7. Anal. calcd for C<sub>37</sub>H<sub>60</sub>O<sub>4</sub>Si: C, 74.44; H, 10.13. Found: C, 74.35; H, 10.34.

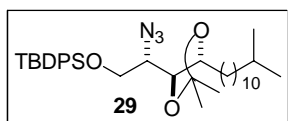

**(2*S*,3*S*,4*R*)-2-Azide-1-*O*-*t*-butyldiphenylsilyl-3,4-*O*-isopropylidene-15-methyl-1,3,4-**

**hexadecanetriol (29).** To a stirred solution of **27** (1.04 g, 1.78 mmol) in CH<sub>2</sub>Cl<sub>2</sub> (10 mL) at 0 °C, trifluoromethanesulfonic anhydride (450  $\mu$ L, 2.76 mmol) and 2,6-di-*tert*-butyl-4-methylpyridine (567 mg, 2.76 mmol) were added. The resulting solution was stirred at 0 °C for 12 h. The reaction mixture was diluted with CH<sub>2</sub>Cl<sub>2</sub> (50 mL) and washed with saturated aqueous NaHCO<sub>3</sub> (2  $\times$  30 mL) and brine (30 mL), dried (Na<sub>2</sub>SO<sub>4</sub>), and concentrated in vacuo. The residue was purified by silica gel quick column chromatography (hexane/EtOAc = 15:1, v/v) to afford the triflate intermediate ( $R_f$  = 0.43, hexane/EtOAc, 15:1, v/v). A solution of the triflate intermediate and tetramethylguanidinium azide (1.41 g, 8.91 mmol) in DMF (15 mL) was stirred at 0 °C for 10 min. The reaction mixture was diluted with EtOAc (100 mL), washed with saturated aqueous NH<sub>4</sub>Cl (2  $\times$  50 mL) and brine (50 mL), dried over MgSO<sub>4</sub>, and concentrated in vacuo. The residue was purified by silica gel flash column chromatography (hexane/EtOAc = 15:1, v/v) to afford the title compound

**29** (952 mg, 1.57 mmol, 88%) as a colorless oil.:  $R_f = 0.55$  (hexane/EtOAc, 15:1, v/v); IR (CHCl<sub>3</sub> film) 1111, 2101 cm<sup>-1</sup>;  $[\alpha]_D^{20} +18.3$  (*c* 0.3, CHCl<sub>3</sub>); <sup>1</sup>H NMR (250 MHz, CDCl<sub>3</sub>)  $\delta$  0.85 (s, 3 H), 0.88 (s, 3 H), 1.08 (s, 9 H), 1.14–1.40 (m, 22 H), 1.41–1.59 (m, 5 H), 3.39–3.46 (m, 1 H), 3.85 (dd, *J* = 7.0, 10.8 Hz, 1 H), 3.95 (dd, *J* = 5.5, 9.7 Hz, 1 H), 4.03 (dd, *J* = 2.6, 10.8 Hz, 1 H), 4.09–4.16 (m, 1 H), 7.36–7.75 (m, 10 H); <sup>13</sup>C NMR (63 MHz, CDCl<sub>3</sub>)  $\delta$  19.3, 22.8, 25.8, 26.6, 26.8, 27.6, 28.1, 28.3, 29.6, 29.7, 29.8, 29.9, 30.1, 39.2, 61.9, 65.4, 75.4, 78.0, 108.3, 127.8, 127.9, 129.88, 129.9, 133.0, 133.2, 135.76, 135.8. Anal. calcd for C<sub>36</sub>H<sub>57</sub>N<sub>3</sub>O<sub>3</sub>Si: C, 71.12; H, 9.45; N, 6.91. Found: C, 71.19; H, 9.72; N, 6.73.

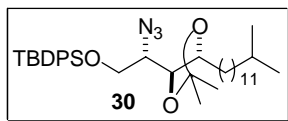

**(2*S*,3*S*,4*R*)-2-Azide-1-*O*-*t*-butyldiphenylsilyl-3,4-*O*-isopropylidene-16-methyl-1,3,4-**

**heptadecanetriol (30).** The title compound **30** was prepared from compound **28** (133 mg, 0.223 mmol) in the same procedure as described for **29**: 122 mg (0.196 mmol, 88%); colorless oil;  $R_f = 0.55$  (hexane/EtOAc, 15:1, v/v); IR (CHCl<sub>3</sub> film) 1116, 2100 cm<sup>-1</sup>;  $[\alpha]_D^{20} +16.8$  (*c* 0.8, CHCl<sub>3</sub>); <sup>1</sup>H NMR (500 MHz, CDCl<sub>3</sub>)  $\delta$  0.86 (s, 3 H), 0.87 (s, 3 H), 1.08 (s, 9 H), 1.13–1.42 (m, 24 H), 1.49–1.55 (m, 5 H), 3.42 (t, *J* = 7.3 Hz, 1 H), 3.85 (dd, *J* = 7.0, 10.5 Hz, 1 H), 3.94 (dd, *J* = 5.5, 9.5 Hz, 1 H), 4.03 (dd, *J* = 2.5, 10.5 Hz, 1 H), 4.09–4.15 (m, 1 H), 7.37–7.73 (m, 10 H); <sup>13</sup>C NMR (125 MHz, CDCl<sub>3</sub>)  $\delta$  19.3, 22.8, 25.8, 26.6, 26.8, 27.6, 28.1, 28.3, 29.6, 29.8, 30.1, 31.7, 31.9, 39.2, 61.9, 65.4, 75.4, 78.0, 108.3, 127.8, 127.9, 129.9, 133.1, 133.2, 135.77, 135.8. Anal. calcd for C<sub>37</sub>H<sub>59</sub>N<sub>3</sub>O<sub>3</sub>Si: C, 71.45; H, 9.56; N, 6.76. Found: C, 71.27; H, 9.77; N, 6.86.

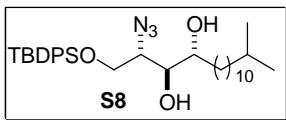

**(2*S*,3*S*,4*R*)-2-Azide-1-*O*-*t*-butyldiphenylsilyl-15-methyl-1,3,4-hexadecanetriol (S8).** A solution of **29** (870 mg, 1.43 mmol) and trifluoroacetic acid (1 mL) in H<sub>2</sub>O (0.1 mL) and CH<sub>2</sub>Cl<sub>2</sub> (9 mL) was stirred at room temperature for 30 min. The reaction mixture was quenched with saturated aqueous NaHCO<sub>3</sub> (10 mL), and extracted with CH<sub>2</sub>Cl<sub>2</sub> (2 × 50 mL). The combined organic layer was washed with saturated aqueous NaHCO<sub>3</sub> (2 × 50 mL) and brine (50 mL), dried (MgSO<sub>4</sub>), and concentrated in vacuo. The residue was purified by silica gel flash column chromatography (hexane/EtOAc, 4:1, v/v) to afford the title compound **S8** (756 mg, 1.33 mmol, 93%) as a colorless oil.: *R*<sub>f</sub> = 0.38 (hexane/EtOAc, 4:1, v/v); IR (CHCl<sub>3</sub> film) 1122, 2100, 3385 cm<sup>-1</sup>; [α]<sub>D</sub><sup>20</sup> +23.5 (*c* 0.4, CHCl<sub>3</sub>); <sup>1</sup>H NMR (500 MHz, CDCl<sub>3</sub>) δ 0.86 (s, 3 H), 0.87 (s, 3 H), 1.08 (s, 9 H), 1.16–1.54 (m, 21 H), 2.14 (brs, 1 H), 2.67 (brs, 1 H), 3.53–3.58 (m, 1 H), 3.63–3.69 (m, 2 H), 3.91 (dd, *J* = 6.0, 10.5 Hz, 1 H), 4.03 (dd, *J* = 3.5, 10.5 Hz, 1 H), 7.38–7.70 (m, 10 H); <sup>13</sup>C NMR (125 MHz, CDCl<sub>3</sub>) δ 19.2, 22.8, 25.8, 26.9, 27.5, 28.1, 29.7, 30.1, 31.9, 39.2, 63.6, 64.3, 72.5, 74.2, 128.0, 130.1, 132.6, 132.7, 135.7. Anal. calcd for C<sub>33</sub>H<sub>53</sub>N<sub>3</sub>O<sub>3</sub>Si: C, 69.80; H, 9.41; N, 7.40. Found: C, 69.86; H, 9.08; N, 7.68.

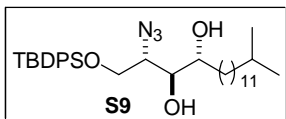

**(2*S*,3*S*,4*R*)-2-Azide-1-*O*-*t*-butyldiphenylsilyl-16-methyl-1,3,4-heptadecanetriol (S9).** The title compound **S9** was prepared from compound **30** (57 mg, 0.0916 mmol) in the same procedure as described for **S8**: 49 mg (0.0842 mmol, 92%); colorless oil; *R*<sub>f</sub> = 0.38 (hexane/EtOAc, 4:1, v/v); IR (CHCl<sub>3</sub> film) 1122, 2100, 3396 cm<sup>-1</sup>; [α]<sub>D</sub><sup>20</sup> +17.8 (*c* 0.8, CHCl<sub>3</sub>); <sup>1</sup>H NMR (500 MHz, CDCl<sub>3</sub>) δ

0.86 (s, 3 H), 0.87 (s, 3 H), 1.08 (s, 9 H), 1.14–1.56 (23 H), 2.07 (brs, 1 H), 2.59 (brs, 1 H), 3.52–3.60 (m, 1 H), 3.64–3.73 (m, 2 H), 3.91 (dd,  $J = 5.5, 10.5$  Hz, 1 H), 4.03 (dd,  $J = 3.5, 10.5$  Hz, 1 H), 7.40–7.70 (m, 10 H);  $^{13}\text{C}$  NMR (125 MHz,  $\text{CDCl}_3$ )  $\delta$  19.2, 22.8, 25.8, 26.9, 27.6, 28.1, 29.7, 30.1, 31.9, 39.2, 63.4, 64.3, 72.5, 74.2, 128.0, 130.2, 132.5, 135.7. Anal. calcd for  $\text{C}_{34}\text{H}_{55}\text{N}_3\text{O}_3\text{Si}$ : C, 70.18; H, 9.53; N, 7.22. Found: C, 70.07; H, 9.72; N, 7.52.

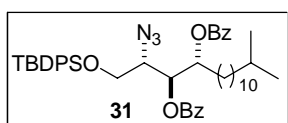

**(2*S*,3*S*,4*R*)-2-Azide-3,4-di-*O*-benzoyl-1-*O*-*t*-buthyldiphenylsilyl-15-methyl-1,3,4-**

**hexadecanetriol (31).** To a solution of compound **S8** (340 mg, 0.60 mmol) in  $\text{CH}_2\text{Cl}_2$  (5mL) and pyridine (5 mL) were added benzoyl chloride (209  $\mu\text{L}$ , 1.80 mmol) and 4-(dimethylamino) pyridine (22 mg, 0.18 mmol). After stirring at room temperature for 12 h, the reaction mixture was quenched with  $\text{NH}_4\text{Cl}$  (5 mL) and extracted with  $\text{CH}_2\text{Cl}_2$  ( $2 \times 30$  mL). The combined organic layer was washed with 2N HCl ( $2 \times 30$  mL) and brine (30 mL), dried ( $\text{MgSO}_4$ ), and concentrated in vacuo. The residue was purified by silica gel flash column chromatography (hexane/EtOAc, 15:1, v/v) to afford the title compound **31** (418 mg, 0.54 mmol, 90%) as a colorless oil.:  $R_f = 0.65$  (hexane/EtOAc, 4:1, v/v); IR ( $\text{CHCl}_3$  film) 1116, 1265, 1731, 2106  $\text{cm}^{-1}$ ;  $[\alpha]_D^{20} +6.6$  (c 0.65,  $\text{CHCl}_3$ );  $^1\text{H}$  NMR (250 MHz,  $\text{CDCl}_3$ )  $\delta$  0.84 (s, 3 H), 0.87 (s, 3 H), 1.05 (s, 9 H), 1.14–1.53 (m, 19 H), 1.75–1.85 (m, 2 H), 3.82–3.91 (m, 2 H), 3.95–4.04 (m, 1 H), 5.51–5.57 (m, 2 H), 7.19–7.67 (m, 16 H), 7.86–7.94 (m, 4 H);  $^{13}\text{C}$  NMR (63 MHz,  $\text{CDCl}_3$ )  $\delta$  19.1, 22.8, 25.5, 26.7, 27.5, 28.1, 29.45, 29.5, 29.6, 29.7, 29.8, 29.83, 30.0, 39.1, 63.2, 64.2, 72.3, 73.2, 127.8, 127.9, 128.5, 128.6, 129.5, 129.8, 129.86, 129.9, 132.5, 132.8, 133.1, 133.4, 135.6, 135.65, 165.1, 165.7. Anal. calcd for

C<sub>47</sub>H<sub>61</sub>N<sub>3</sub>O<sub>5</sub>Si: C, 72.74; H, 7.92; N, 5.41. Found: C, 72.70; H, 7.63; N, 5.68.

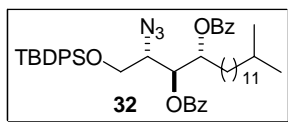

**(2*S*,3*S*,4*R*)-2-Azide-3,4-di-*O*-benzoyl-1-*O*-*t*-butyldiphenylsilyl-16-methyl-1,3,4-**

**heptadecanetriol (32).** The title compound **32** was prepared from compound **S9** (38 mg, 0.065 mmol) in the same procedure as described for **31**: 46 mg (0.058 mmol, 89%); colorless oil;  $R_f$  = 0.65 (hexane/EtOAc, 4:1, v/v); IR (CHCl<sub>3</sub> film) 1116, 1265, 1731, 2105 cm<sup>-1</sup>;  $[\alpha]_D^{20}$  +9.4 (*c* 0.5, CHCl<sub>3</sub>); <sup>1</sup>H NMR (500 MHz, CDCl<sub>3</sub>) δ 0.85 (s, 3 H), 0.86 (s, 3 H), 1.04 (s, 9 H), 1.14–1.42 (m, 20 H), 1.43–1.52 (m, 1 H), 1.77–1.83 (m, 2 H), 3.79–3.90 (m, 2 H), 3.93–4.02 (m, 1 H), 5.44–5.58 (m, 2 H), 7.21–7.65 (m, 16 H), 7.87 (d, *J* = 7.5 Hz, 2 H), 7.91 (d, *J* = 7.5 Hz, 2 H); <sup>13</sup>C NMR (125 MHz, CDCl<sub>3</sub>) δ 19.2, 22.8, 25.5, 26.8, 27.5, 28.1, 29.5, 29.7, 29.8, 30.1, 39.2, 63.3, 64.3, 72.4, 73.3, 127.9, 128.5, 128.6, 129.9, 132.6, 132.9, 133.1, 133.4, 135.7, 165.2, 165.8. Anal. calcd for C<sub>48</sub>H<sub>63</sub>N<sub>3</sub>O<sub>5</sub>Si: C, 72.97; H, 8.04; N, 5.32. Found: C, 72.88; H, 8.24; N, 5.16.

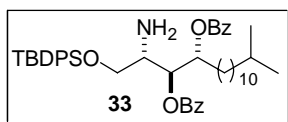

**(2*S*,3*S*,4*R*)-2-Amino-3,4-di-*O*-benzoyl-1-*O*-*t*-butyldiphenylsilyl-15-methyl-1,3,4-**

**hexadecanetriol (33).** Compound **31** (355 mg, 0.457 mmol) was stirred under hydrogen atmosphere using a balloon in the presence of Pd(OH)<sub>2</sub> (20%, 177 mg) in MeOH–EtOAc (1:1, v/v, 10 mL) at room temperature for 4 h. The reaction mixture was filtered through Celite® and the filtrate was concentrated in vacuo. The residue was purified by silica gel flash column

chromatography (hexane/EtOAc, 4:1, v/v) to afford the title compound **33** (319 mg, 0.425 mmol, 93%) as a colorless oil.:  $R_f = 0.28$  (hexane/EtOAc, 4:1, v/v); IR (CHCl<sub>3</sub> film) 1116, 1275, 1726, 3375 cm<sup>-1</sup>;  $[\alpha]_D^{20} -22.8$  (c 1.2, CHCl<sub>3</sub>); <sup>1</sup>H NMR (250 MHz, CDCl<sub>3</sub>)  $\delta$  0.84 (s, 3 H), 0.87 (s, 3 H), 1.04 (s, 9 H), 1.15–1.55 (m, 19 H), 1.77–1.83 (m, 2 H), 2.09 (brs, 2 H), 3.24–3.31 (m, 1 H), 3.65 (dd,  $J = 6.6, 10.2$  Hz, 1 H), 3.84 (dd,  $J = 3.1, 10.2$  Hz, 1 H), 5.51 (dd,  $J = 3.5, 7.3$  Hz, 1 H), 5.62–5.68 (m, 1 H), 7.15–7.65 (m, 16 H), 7.90–7.93 (m, 4 H); <sup>13</sup>C NMR (63 MHz, CDCl<sub>3</sub>)  $\delta$  19.3, 22.8, 25.6, 26.9, 27.5, 28.0, 29.5, 29.6, 29.7, 29.75, 30.0, 39.1, 53.6, 65.7, 73.9, 74.8, 127.7, 127.8, 128.0, 128.37, 128.4, 129.7, 129.8, 130.0, 130.1, 130.2, 132.9, 133.0, 133.1, 133.3, 135.6, 135.63, 165.5, 166.0. Anal. calcd for C<sub>47</sub>H<sub>63</sub>NO<sub>5</sub>Si: C, 75.26; H, 8.47; N, 1.87. Found: C, 75.28; H, 8.25; N, 1.74.

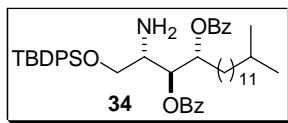

**(2*S*,3*S*,4*R*)-2-Amino-3,4-di-*O*-benzoyl-1-*O*-*t*-butyldiphenylsilyl-16-methyl-1,3,4-**

**heptadecanetriol (34).** The title compound **34** was prepared from compound **32** (39 mg, 0.0494 mmol) in the same procedure as described for **33**: 36 mg (0.0471 mmol, 95%); colorless oil;  $R_f = 0.28$  (hexane/EtOAc, 4:1, v/v); IR (CHCl<sub>3</sub> film) 1111, 1270, 1726, 3370 cm<sup>-1</sup>;  $[\alpha]_D^{20} -14.0$  (c 0.3, CHCl<sub>3</sub>); <sup>1</sup>H NMR (250 MHz, CDCl<sub>3</sub>)  $\delta$  0.84 (s, 3 H), 0.87 (s, 3 H), 1.03 (s, 9 H), 1.14–1.55 (m, 21 H), 1.75–1.83 (m, 2 H), 1.97 (brs, 2 H), 3.22–3.29 (m, 1 H), 3.63 (dd,  $J = 6.9, 10.2$  Hz, 1 H), 3.83 (dd,  $J = 3.2, 10.2$  Hz, 1 H), 5.48 (dd,  $J = 3.5, 7.4$  Hz, 1 H), 5.59–5.65 (m, 1 H), 7.18–7.65 (m, 16 H), 7.88–7.92 (m, 4 H); <sup>13</sup>C NMR (63 MHz, CDCl<sub>3</sub>)  $\delta$  19.3, 22.8, 25.7, 27.0, 27.5, 28.1, 29.6, 29.67, 29.7, 29.77, 29.8, 30.1, 39.2, 53.6, 65.8, 74.0, 74.9, 127.8, 127.9, 128.4, 128.5, 129.8, 129.84, 130.0,

130.1, 130.3, 133.0, 133.1, 133.3, 135.65, 135.7, 165.6, 166.1. HRMS (FAB) calcd for  $C_{48}H_{65}NO_5SiNa (M+Na)^+$ :  $m/z$  786.4530. Found: 786.4538.

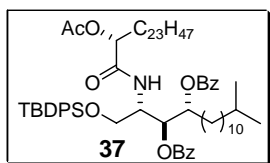

**(2*S*,3*S*,4*R*)-*N*-[(*R*)-2-Acetoxypentacosanoyl]-2-amino-3,4-di-*O*-benzoyl-1-*O*-*t*-**

**buthyldiphenylsilyl-15-methyl-1,3,4-hexadecanetriol (37).** A solution of **33** (45 mg, 0.06 mmol), **35** (32 mg, 0.073 mmol), and 2-ethoxy-1-ethoxycarbonyl-1,2-dihydroquinoline (EEDQ) (23 mg, 0.093 mmol) in  $CH_2Cl_2$  (5 mL) was stirred at room temperature for 2 h. The reaction mixture was diluted with EtOAc (50 mL), washed consecutively with aqueous  $NaHCO_3$ , aqueous 1 N HCl. The organic layer was dried over  $MgSO_4$ , concentrated in vacuo, and the residue was purified by silica gel flash column chromatography (hexane/EtOAc, 9:1, v/v) to afford the title compound **37** (68 mg, 0.058 mmol, 97%) as a colorless oil.:  $R_f$  = 0.33 (hexane/EtOAc, 9:1, v/v); IR ( $CHCl_3$  film) 1112, 1280, 1690, 1731  $cm^{-1}$ ;  $[\alpha]_D^{20}$  +34.1 ( $c$  0.8,  $CHCl_3$ );  $^1H$  NMR (250 MHz,  $CDCl_3$ )  $\delta$  0.84 (s, 3 H), 0.86 (s, 3 H), 0.88 (t,  $J$  = 6.2 Hz, 3 H), 0.99 (s, 9 H), 1.07–1.53 (m, 61 H), 1.82–1.96 (m, 4 H), 2.04 (s, 3 H), 3.65 (dd,  $J$  = 2.9, 10.6 Hz, 1 H), 3.75 (dd,  $J$  = 2.6, 10.6 Hz, 1 H), 4.47–4.55 (m, 1 H), 5.31–5.37 (m, 2 H), 5.86 (dd,  $J$  = 2.3, 9.3 Hz, 1 H), 6.99–7.64 (m, 17 H), 7.95–8.00 (m, 4 H);  $^{13}C$  NMR (63 MHz,  $CDCl_3$ )  $\delta$  14.3, 19.3, 21.0, 22.8, 22.83, 25.0, 25.9, 26.7, 26.8, 27.6, 28.1, 28.6, 29.5, 29.6, 29.7, 29.8, 29.9, 30.1, 32.1, 32.4, 39.2, 49.7, 62.2, 72.0, 74.2, 74.3, 127.7, 127.8, 128.0, 128.5, 128.6, 129.9, 129.93, 130.0, 130.4, 132.1, 133.0, 133.3, 134.9, 135.4, 135.6, 165.2, 166.5, 169.7, 169.8. Anal. calcd for  $C_{74}H_{113}NO_8Si$ : C, 75.79; H, 9.71; N, 1.19. Found: C, 75.74; H, 9.55; N, 1.11.

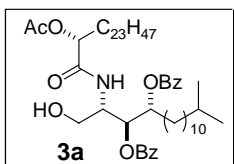

**(2*S*,3*S*,4*R*)-*N*-[(*R*)-2-Acetoxypentacosanoyl]-2-amino-3,4-di-*O*-benzoyl-15-methyl-1,3,4-**

**hexadecanetriol (3a).** A solution of compound **37** (68 mg, 0.058 mmol) and Bu<sub>4</sub>NF (1.0 M, 87 μL, 0.087 mmol) in THF (3 mL) was stirred at room temperature for 1 h. The reaction mixture was concentrated in vacuo. The residue was purified by silica gel flash column chromatography (hexane/EtOAc, 2:1, v/v) to afford the title compound **3a** (52 mg, 0.056 mmol, 97 %) as a colorless oil.: *R*<sub>f</sub> = 0.38 (hexane/EtOAc, 2:1, v/v); IR (CHCl<sub>3</sub> film) 1285, 1724, 3361 cm<sup>-1</sup>; [α]<sub>D</sub><sup>20</sup> +58.3 (*c* 0.4, CHCl<sub>3</sub>); <sup>1</sup>H NMR (250 MHz, CDCl<sub>3</sub>) δ 0.84 (s, 3 H), 0.87 (s, 3 H), 0.90 (t, *J* = 6.3 Hz, 3 H), 1.04–1.53 (m, 61 H), 1.87–1.89 (m, 2 H), 1.95–2.05 (m, 2 H), 2.18 (s, 3 H), 3.24 (brs, 1 H), 3.45–3.72 (m, 2 H), 4.36–4.43 (m, 1 H), 5.18 (t, *J* = 6.2 Hz, 1 H), 5.36–5.41 (m, 1 H), 5.54 (dd, *J* = 2.3, 9.4 Hz, 1 H), 7.18 (d, *J* = 9.4 Hz, 1 H), 7.32–7.62 (m, 6 H), 7.93–8.05 (m, 4 H); <sup>13</sup>C NMR (63 MHz, CDCl<sub>3</sub>) δ 14.2, 20.9, 22.7, 22.74, 25.0, 25.9, 27.5, 28.0, 28.5, 29.4, 29.5, 29.67, 29.7, 29.8, 30.0, 32.0, 39.1, 50.0, 61.2, 73.2, 74.0, 74.4, 128.4, 128.6, 129.2, 129.7, 129.9, 129.95, 133.1, 133.7, 166.3, 166.7, 170.2, 170.4. HRMS (FAB) calcd for C<sub>58</sub>H<sub>95</sub>NO<sub>8</sub>Na (M+Na)<sup>+</sup>: *m/z* 956.6955. Found: 956.6971. Anal. calcd for C<sub>58</sub>H<sub>95</sub>NO<sub>8</sub>: C, 74.55; H, 10.25; N, 1.50. Found: C, 74.44; H, 10.45; N, 1.37.

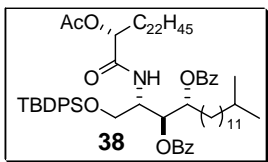

**(2*S*,3*S*,4*R*)-*N*-[(*R*)-2-Acetoxypentacosanoyl]-2-amino-3,4-di-*O*-benzoyl-1-*O*-*t*-**

**buthyldiphenylsilyl-16-methyl-1,3,4-heptadecanetriol (38).** The title compound **38** was prepared from compound **34** (33 mg, 0.043 mmol) and compound **36** (22 mg, 0.052 mmol) in the same procedure as described for **37**: 48 mg (0.041 mmol, 95%); colorless oil;  $R_f = 0.33$  (hexane/EtOAc, 9:1, v/v); IR (CHCl<sub>3</sub> film) 1112, 1286, 1690, 1731 cm<sup>-1</sup>;  $[\alpha]_D^{20} +38$  (*c* 0.45, CHCl<sub>3</sub>); <sup>1</sup>H NMR (500 MHz, CDCl<sub>3</sub>)  $\delta$  0.84 (s, 3 H), 0.86 (s, 3 H), 0.88 (t, *J* = 6.2 Hz, 3 H), 0.99 (s, 9 H), 1.08–1.53 (m, 61 H), 1.81–1.96 (m, 4 H), 2.04 (s, 3 H), 3.66 (dd, *J* = 2.4, 10.4 Hz, 1 H), 3.73–3.76 (m, 1 H), 4.51 (t, *J* = 8.6 Hz, 1 H), 5.29–5.36 (m, 2 H), 5.85 (dd, *J* = 2.3, 8.6 Hz, 1 H), 7.00–7.60 (m, 17 H), 7.91–8.05 (m, 4 H); <sup>13</sup>C NMR (125 MHz, CDCl<sub>3</sub>)  $\delta$  14.3, 19.2, 21.0, 22.8, 25.0, 25.9, 26.8, 27.6, 28.1, 28.6, 29.5, 29.6, 29.8, 30.1, 32.1, 32.4, 39.2, 49.7, 62.3, 72.0, 74.2, 74.3, 127.7, 128.0, 128.4, 128.6, 129.9, 130.4, 132.2, 132.8, 133.0, 133.3, 135.4, 135.6, 165.2, 166.5, 169.7, 169.8. Anal. Calcd for C<sub>74</sub>H<sub>113</sub>NO<sub>8</sub>Si: C, 75.79; H, 9.71; N, 1.19. Found: C, 75.81; H, 9.35; N, 1.08.

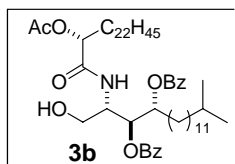

**(2*S*,3*S*,4*R*)-*N*-[(*R*)-2-Acetoxypentacosanoyl]-2-amino-3,4-di-*O*-benzoyl-16-methyl-1,3,4-heptadecanetriol (3b).** The title compound **3b** was prepared from compound **38** (48 mg, 0.0409 mmol) in the same procedure as described above **3a**: 37 mg (0.0396 mmol, 97%); colorless oil;  $R_f = 0.38$  (hexane/EtOAc, 2:1, v/v); IR (CHCl<sub>3</sub> film) 1278, 1670, 1732, 3357 cm<sup>-1</sup>;  $[\alpha]_D^{20} +54.2$  (*c* 0.3, CHCl<sub>3</sub>); <sup>1</sup>H NMR (250 MHz, CDCl<sub>3</sub>)  $\delta$  0.84 (s, 3 H), 0.87 (s, 3 H), 0.88 (t, *J* = 6.2 Hz, 3 H), 1.12–1.56 (m, 61 H), 1.87–1.89 (m, 2 H), 0.98–2.05 (m, 2 H), 2.21 (s, 3 H), 2.76 (brs, 1 H), 3.49–3.71 (m, 2 H), 4.32–4.39 (m, 1 H), 5.19 (t, *J* = 6.1 Hz, 1 H), 5.36–5.40 (m, 1 H), 5.45 (dd, *J* = 2.4, 9.3 Hz, 1 H), 7.03 (d, *J* = 9.3 Hz, 1 H), 7.35–7.67 (m, 6 H), 7.94–8.07 (m, 4 H); <sup>13</sup>C NMR (63

MHz, CDCl<sub>3</sub>)  $\delta$  14.3, 21.2, 22.8, 22.83, 25.1, 26.0, 27.6, 28.1, 28.6, 29.45, 29.5, 29.54, 29.6, 29.75, 29.8, 29.85, 30.1, 32.1, 39.2, 50.0, 61.4, 73.6, 73.9, 74.4, 128.5, 128.8, 129.1, 129.8, 130.0, 130.1, 133.3, 134.0, 166.3, 167.2, 170.2, 170.4. MALDI-TOF calcd for C<sub>58</sub>H<sub>95</sub>NO<sub>8</sub>Na (M+Na)<sup>+</sup>:  $m/z$  956.6955. Found: 956.7050. Anal. calcd for C<sub>58</sub>H<sub>95</sub>NO<sub>8</sub>: C, 74.55; H, 10.25; N, 1.50. Found: C, 74.53; H, 10.30; N, 1.44.

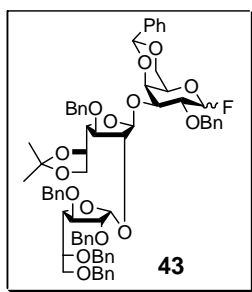

**2,3,5,6-Tetra-*O*-benzyl- $\alpha$ -D-galactofuranosyl-(1 $\rightarrow$ 2)-(3-*O*-benzyl-5,6-*O*-isopropylidene- $\beta$ -D-galactofuranosyl)-(1 $\rightarrow$ 3)-2-*O*-benzyl-4,6-*O*-benzylidene-D-galactopyranosyl fluoride (43).** A solution of donor **2** (100 mg, 0.077 mmol) and DTBMP (50 mg, 0.24 mmol) in CH<sub>2</sub>Cl<sub>2</sub> (10 mL) in the presence of 4 Å molecular sieves was stirred for 10 min at room temperature and cooled to  $-78$  °C. To the resulting solution was added a solution of Tf<sub>2</sub>O (20  $\mu$ L, 0.12 mmol) and subsequently added hydrogen fluoride (70% in pyridine, 6  $\mu$ L, 0.23 mmol), then the solution was stirred at  $-78$  °C for further 1 h and allowed to warm to 0 °C over 1 h. The reaction mixture was quenched with saturated aqueous NaHCO<sub>3</sub> (1 mL) and diluted with CH<sub>2</sub>Cl<sub>2</sub> (50 mL). The organic layer was washed with saturated aqueous NaHCO<sub>3</sub> (2  $\times$  30 mL) and brine (50 mL), dried over MgSO<sub>4</sub>, and concentrated in vacuo. The residue was purified by flash column chromatography (hexane/EtOAc, 2:1, v/v) to afford the title compound **43** (75 mg, 0.064 mmol, 83 %,  $\beta/\alpha$  = 20:1). **43a**: colorless oil,  $R_f$  = 0.4 (hexane/EtOAc, 2:1, v/v); IR (CHCl<sub>3</sub> film) 2925, 1456, 1125 cm<sup>-1</sup>; [ $\alpha$ ]<sub>D</sub> +52.0 ( $c$  0.1,

CHCl<sub>3</sub>); <sup>1</sup>H NMR (250 MHz, CDCl<sub>3</sub>) δ 1.32 (s, 3 H), 1.33 (s, 3 H), 3.62–3.79 (m, 6 H), 3.88–4.01 (m, 4 H), 4.06–4.26 (m, 6 H), 4.31–4.44 (m, 7 H), 4.48–4.58 (m, 3 H), 4.63–4.73 (m, 4 H), 4.96 (d, *J* = 4.6 Hz, 1 H), 5.26 (brs, 1 H), 5.56 (s, 1 H), 5.63 and 5.85 (dd, *J* = 2.3, 53.4 Hz, 1 H), 7.21–7.50 (m, 35 H); <sup>13</sup>C NMR (63 MHz, CDCl<sub>3</sub>) δ 25.6, 26.8, 64.9, 65.5, 69.0, 70.8, 72.0, 72.5(2), 73.3, 73.5, 73.8, 74.2 and 74.6 (d, *J* = 23.9 Hz, C-2), 75.6, 76.3, 77.0, 77.4, 79.4, 80.1, 83.0, 83.9, 84.8, 84.9, 98.8, 100.7, 104.9 and 108.5 (d, *J* = 223.5 Hz, C-1), 108.5, 109.8, 126.2, 127.6, 127.7, 127.8, 127.9, 128.0, 128.06, 128.1, 128.2, 128.3, 128.4, 128.5, 128.6, 128.63, 128.9, 137.67, 138.0, 138.16, 138.2, 138.3, 138.4. HRMS (FAB) calcd for (M+Na)<sup>+</sup>: *m/z* 1197.4988. Found: 1197.4991. Anal. calcd for C<sub>70</sub>H<sub>75</sub>FO<sub>15</sub>: C, 71.53; H, 6.43. Found: C, 71.61; H, 6.26.

**43β**: colorless oil, *R<sub>f</sub>* = 0.25 (hexane/EtOAc, 2:1, v/v); IR (CHCl<sub>3</sub> film) 2929, 1459, 1102 cm<sup>-1</sup>; [α]<sub>D</sub> +68.0 (*c* 0.2, CHCl<sub>3</sub>); <sup>1</sup>H NMR (250 MHz, CDCl<sub>3</sub>) δ 1.34 (s, 6 H), 3.51 (brs, 1 H), 3.60–3.78 (m, 7 H), 3.83–3.88 (m, 1 H), 3.96–3.97 (m, 1 H), 3.99–4.01 (m, 1 H), 4.07–4.20 (m, 4 H), 4.23 and 4.55 (ABq, *J* = 11.4 Hz, 2 H), 4.31–4.43 (m, 8 H), 4.52 (d, *J* = 2.0 Hz, 1 H), 4.61–4.72 (m, 3 H), 4.86 (d, *J* = 10.9 Hz, 1 H), 4.90 (d, *J* = 4.7 Hz, 1 H), 5.12 and 5.34 (dd, *J* = 7.2, 53.0 Hz, 1 H), 5.23 (brs, 1 H), 5.56 (s, 1 H), 7.15–7.53 (m, 35 H); <sup>13</sup>C NMR (63 MHz, CDCl<sub>3</sub>) δ 25.5, 26.8, 65.4, 66.8, 66.9, 68.7, 70.7, 71.9, 72.2, 72.4, 73.3, 73.5, 75.2, 75.7, 77.0, 77.4 and 77.8 (d, *J* = 30.3 Hz, C-2), 77.9, 79.3, 80.1, 83.2, 83.9, 84.4, 84.9, 98.6, 101.0, 108.3, 108.7 and 112.1 (d, *J* = 215.5 Hz, C-1), 109.8, 126.3, 127.5, 127.6, 127.7, 127.75, 127.8, 127.9, 127.97, 128.0, 128.2, 128.3, 128.4, 128.44, 128.5, 128.9, 137.7, 138.1, 138.16, 138.2, 138.3, 138.4. HRMS (FAB) calcd for (M+Na)<sup>+</sup>: *m/z* 1197.4988. Found: 1197.4987. Anal. calcd for C<sub>70</sub>H<sub>75</sub>FO<sub>15</sub>: C, 71.53; H, 6.43. Found: C, 71.28; H, 6.54.

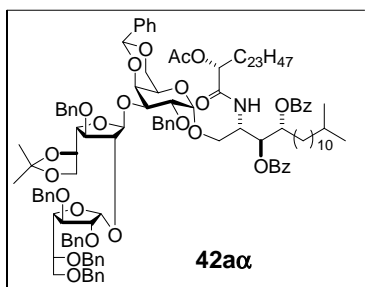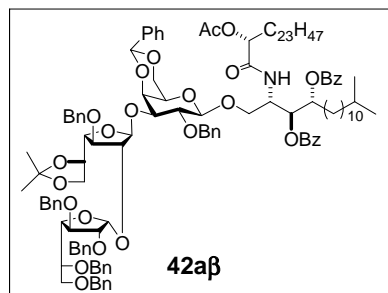

### Synthesis of **42a** (Glycosylation of ceramide **3a**).

**Method A:** Using CB glycoside **2** as glycosyl donor.

A solution of ceramide **3a** (150 mg, 0.161 mmol) and 2,6-di-*tert*-butyl-4-methylpyridine (83 mg, 0.404 mmol) in CH<sub>2</sub>Cl<sub>2</sub> (20 mL) in the presence of 4 Å molecular sieves was stirred for 10 min at room temperature and cooled to −78 °C. To the resulting solution were added sequentially a solution of Tf<sub>2</sub>O (34 μL, 0.202 mmol) and dropwise a solution of CB glycosyl donor **2** (175 mg, 0.134 mmol) in CH<sub>2</sub>Cl<sub>2</sub> (10 mL). The reaction mixture was stirred for further 1 h at −78 °C, allowed to warm over 1 h to 0 °C, diluted with CH<sub>2</sub>Cl<sub>2</sub> (50 mL), and quenched with saturated aqueous NaHCO<sub>3</sub> (2 mL). The organic layer was washed with saturated aqueous NaHCO<sub>3</sub> (2 × 30 mL) and brine (30 mL), dried over MgSO<sub>4</sub>, and concentrated in vacuo. The residue was purified by silica gel flash column chromatography (hexane/EtOAc, 3:1, v/v) to afford the title compound **42a** (216 mg, 0.103 mmol, 77%,  $\alpha/\beta = 1.4:1$ ).

**Method B:** Using glycosyl fluoride **43** as glycosyl donor.

A solution of ceramide **3a** (27 mg, 0.029 mmol), tin(II) chloride (13 mg, 0.069 mmol), silver perchlorate (14 mg, 0.068 mmol), and 2,6-di-*tert*-butyl-4-methylpyridine (7 mg, 0.034 mmol) in THF (5 mL) in the presence of 4 Å molecular sieves was stirred for 30 min at room temperature and cooled to −10 °C. To the resulting solution was dropwise added a solution of glycosyl fluoride **43** (52 mg, 0.044 mmol) in THF (2 mL) at −10 °C. The reaction mixture was stirred for further 1 h at −

10 °C, allowed to warm over 1 h to room temperature, diluted with diethyl ether (50 mL), and quenched with saturated aqueous NaHCO<sub>3</sub> (5 mL). The organic layer was washed with saturated aqueous NaHCO<sub>3</sub> (2 × 30 mL) and brine (30 mL), dried over MgSO<sub>4</sub>, and concentrated in vacuo. The residue was purified by silica gel flash column chromatography (hexane/EtOAc, 3:1, v/v) to afford the title compound **42aα** (43 mg, 0.021 mmol, 72%).

**42aα** : colorless oil, *R<sub>f</sub>* = 0.35 (hexane/EtOAc, 3:1, v/v); IR (CHCl<sub>3</sub> film) 1262, 1367, 1525, 1679, 1728, 3321 cm<sup>-1</sup>; [α]<sub>D</sub><sup>20</sup> +47.6 (*c* 2.0, CHCl<sub>3</sub>); <sup>1</sup>H NMR (500 MHz, CDCl<sub>3</sub>) δ 0.85 (s, 3 H), 0.86 (s, 3 H), 0.88 (t, *J* = 6.5 Hz, 3 H), 1.14–1.51 (m, 67 H), 1.82–1.95 (m, 4 H), 2.15 (s, 3 H), 3.56–3.68 (m, 5 H), 3.72–3.78 (m, 2 H), 3.90–4.04 (m, 6 H), 4.09–4.15 (m, 3 H), 4.22 (d, *J* = 12.0 Hz, 1 H), 4.30 (d, *J* = 11.5 Hz, 1 H), 4.37–4.48 (m, 7 H), 4.50–4.60 (m, 6 H), 4.63–4.69 (m, 2 H), 4.78 (d, *J* = 3.1 Hz, 1 H), 5.01 (d, *J* = 4.0 Hz, 1 H), 5.13 (t, *J* = 5.8 Hz, 1 H), 5.17–5.27 (m, 1 H), 5.21 (brs, 1 H), 5.57 (s, 1 H), 5.70 (d, *J* = 9.5 Hz, 1 H), 7.14–7.55 (m, 41 H), 7.68 (d, *J* = 10.0 Hz, 1 H), 7.93 (d, *J* = 7.5 Hz, 2 H), 7.99 (d, *J* = 7.5 Hz, 2 H); <sup>13</sup>C NMR (125 MHz, CDCl<sub>3</sub>) δ 14.2, 21.1, 22.8, 25.3, 25.6, 25.9, 26.7, 27.5, 27.8, 28.1, 29.5, 29.8(m), 30.0, 32.0, 32.3, 39.2, 48.7, 63.8, 65.5, 69.3, 70.8, 71.3, 71.9, 72.3, 72.4, 73.3, 73.5, 73.7, 74.2, 74.5, 74.9, 75.9, 76.69, 76.7, 77.3, 79.6, 80.1, 82.5, 83.7, 84.6, 84.8, 98.5, 100.5, 100.8, 107.9, 109.6, 126.1, 127.4, 127.6, 127.7, 127.9, 128.1, 128.25, 128.3, 128.4, 128.6, 129.8, 129.9, 130.2, 133.1, 133.4, 137.7, 138.2, 138.4, 165.1, 166.6, 170.5, 171.1. MALDI-TOF calcd for C<sub>128</sub>H<sub>169</sub>NNaO<sub>23</sub> (M+Na)<sup>+</sup>: *m/z* 2111.1983. Found: 2111.1982. Anal. calcd for C<sub>128</sub>H<sub>169</sub>NO<sub>23</sub>: C, 73.57; H, 8.15; N, 0.67. Found: C, 73.57; H, 8.35; N, 0.62.

**42aβ** : colorless oil, *R<sub>f</sub>* = 0.18 (hexane/EtOAc, 3:1, v/v); IR (CHCl<sub>3</sub> film) 1285, 1455, 1690, 1721, 3388 cm<sup>-1</sup>; [α]<sub>D</sub><sup>20</sup> +48.6 (*c* 0.1, CHCl<sub>3</sub>); <sup>1</sup>H NMR (500 MHz, CDCl<sub>3</sub>) δ 0.84 (s, 3 H), 0.86 (s, 3 H), 0.88 (t, *J* = 6.0 Hz, 3 H), 1.13–1.51 (m, 67 H), 1.76–2.01 (m, 4 H), 1.85 (s, 3 H), 3.45 (brs, 1 H),

3.56–3.73 (m, 8 H), 3.82–3.91 (m, 2 H), 3.92–4.01 (m, 3 H), 4.05–4.14 (m, 2 H), 4.19 (d,  $J = 12.0$  Hz, 1 H), 4.26 (d,  $J = 11.5$  Hz, 1 H), 4.28–4.32 (m, 1 H), 4.33–4.44 (m, 8 H), 4.49 (brs, 1 H), 4.55–4.59 (m, 3 H), 4.65 (d,  $J = 12.5$  Hz, 1 H), 4.68 (d,  $J = 11.5$  Hz, 1 H), 4.77 (d,  $J = 11.0$  Hz, 1 H), 4.92 (d,  $J = 4.0$  Hz, 1 H), 5.10 (t,  $J = 6.1$  Hz, 1 H), 5.19 (brs, 1 H), 5.35–5.39 (m, 1 H), 5.54 (s, 1 H), 5.75 (dd,  $J = 3.1, 8.6$  Hz, 1 H), 6.93 (d,  $J = 9.0$  Hz, 1 H), 7.15–7.54 (m, 41 H), 7.95 (d,  $J = 7.5$  Hz, 2 H), 8.01 (d,  $J = 7.5$  Hz, 2 H);  $^{13}\text{C}$  NMR (125 MHz,  $\text{CDCl}_3$ )  $\delta$  14.2, 20.9, 22.8, 25.0, 25.6, 25.7, 26.8, 27.5, 28.1, 28.7, 29.5, 29.8(m), 30.0, 32.0, 39.2, 48.3, 65.5, 66.7, 68.1, 69.0, 70.8, 71.9, 72.2, 72.4, 73.0, 73.3, 73.6, 73.9, 74.2, 75.4, 76.3, 76.9, 77.9, 79.2, 79.4, 80.1, 83.0, 83.8, 84.5, 85.1, 98.7, 100.5, 104.4, 108.4, 109.8, 126.1, 127.7, 128.0, 128.1, 128.4, 129.8, 130.0, 130.1, 133.1, 133.4, 137.7, 138.1, 138.2, 138.4, 138.7, 165.5, 166.2, 170.3, 170.5. MALDI-TOF calcd for  $\text{C}_{128}\text{H}_{169}\text{NNaO}_{23}$  ( $\text{M}+\text{Na}$ ) $^{+}$ :  $m/z$  2111.1983. Found: 2111.1980. Anal. calcd for  $\text{C}_{128}\text{H}_{169}\text{NO}_{23}$ : C, 73.57; H, 8.15; N, 0.67. Found: C, 73.65; H, 8.38; N, 0.63.

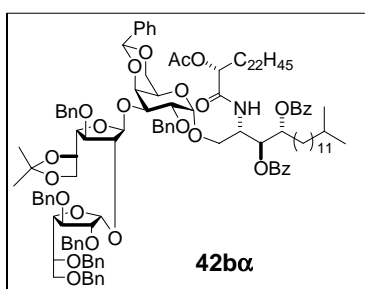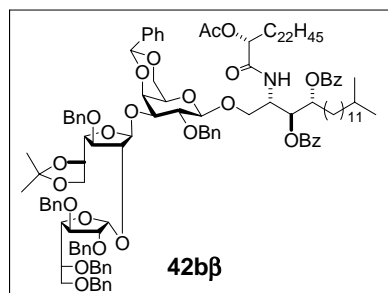

### Synthesis of 42b (Glycosylation of ceramide 3b).

**Method A:** Using CB glycoside **2** as glycosyl donor.

A solution of ceramide **3b** (170 mg, 0.182 mmol) and 2,6-di-*tert*-butyl-4-methylpyridine (93 mg, 0.453 mmol) in  $\text{CH}_2\text{Cl}_2$  (20 mL) in the presence of 4Å molecular sieves was stirred for 10 min at room temperature and cooled to  $-78^\circ\text{C}$ . To the resulting solution were added sequentially a solution

of  $\text{TiF}_2\text{O}$  (38  $\mu\text{L}$ , 0.226 mmol) and dropwise a solution of CB glycosyl donor **2** (197 mg, 0.151 mmol) in  $\text{CH}_2\text{Cl}_2$  (10 mL). The reaction mixture was stirred for further 1 h at  $-78^\circ\text{C}$ , allowed to warm over 1 h to  $0^\circ\text{C}$ , diluted with  $\text{CH}_2\text{Cl}_2$  (50 mL), and quenched with saturated aqueous  $\text{NaHCO}_3$  (2 mL). The organic phase was washed with saturated aqueous  $\text{NaHCO}_3$  ( $2 \times 30$  mL) and brine (30 mL), dried over  $\text{MgSO}_4$ , and concentrated in vacuo. The residue was purified by silica gel flash column chromatography (hexane/EtOAc, 3:1, v/v) to afford the title compound **42b** (237 mg, 0.113 mmol, 75%,  $\alpha/\beta = 1.4:1$ ).

**Method B:** Using glycosyl fluoride **43** as glycosyl donor.

A solution of ceramide **3b** (25 mg, 0.027 mmol), tin(II) chloride (12 mg, 0.063 mmol), silver perchlorate (13 mg, 0.063 mmol), and 2,6-di-*tert*-butyl-4-methylpyridine (7 mg, 0.034 mmol) in THF (5 mL) in the presence of  $4\text{\AA}$  molecular sieves was stirred for 30 min at room temperature and cooled to  $-10^\circ\text{C}$ . To the resulting solution was dropwise added a solution of glycosyl fluoride **43** (47 mg, 0.040 mmol) in THF (2 mL) at  $-10^\circ\text{C}$ . The reaction mixture was stirred for further 1 h at  $-10^\circ\text{C}$ , allowed to warm over 1 h to room temperature, diluted with diethyl ether (50 mL), and quenched with saturated aqueous  $\text{NaHCO}_3$  (5 mL). The organic phase was washed with saturated aqueous  $\text{NaHCO}_3$  ( $2 \times 30$  mL) and brine (30 mL), dried over  $\text{MgSO}_4$ , and concentrated in vacuo. The residue was purified by silica gel flash column chromatography (hexane /EtOAc, 3:1, v/v) to afford the title compound **42ba** (41 mg, 0.020 mmol, 74%).

**42ba** : colorless oil,  $R_f = 0.35$  (hexane/EtOAc, 3:1, v/v); IR ( $\text{CHCl}_3$  film) 1267, 1456, 1679, 1729,  $3330\text{ cm}^{-1}$ ;  $[\alpha]_D^{20} +47.4$  ( $c$  0.2,  $\text{CHCl}_3$ );  $^1\text{H}$  NMR (250 MHz,  $\text{CDCl}_3$ )  $\delta$  0.84 (s, 3 H), 0.87 (s, 3 H), 0.88 (t,  $J = 6.3$  Hz, 3 H), 1.35–1.55 (m, 67 H), 1.81–1.85 (m, 4 H), 2.15 (s, 3 H), 3.55–3.76 (m, 7 H), 3.88–4.01 (m, 5 H), 4.03–4.19 (m, 4 H), 4.25 (d,  $J = 6.8$  Hz, 1 H), 4.29–4.45 (m, 8 H),

4.51–4.53 (m, 3 H), 4.57–4.66 (m, 4 H), 4.68 (d,  $J = 7.7$  Hz, 1 H), 4.80 (d,  $J = 3.2$  Hz, 1 H), 5.01 (d,  $J = 4.6$  Hz, 1 H), 5.10 (d,  $J = 6.0$  Hz, 1 H), 5.18–5.27 (m, 2 H), 5.56 (s, 1 H), 5.74 (dd,  $J = 1.9, 10.2$  Hz, 1 H), 7.12–7.60 (m, 41 H), 7.83 (d,  $J = 9.8$  Hz, 1 H), 7.90–8.01 (m, 4 H);  $^{13}\text{C}$  NMR (63 MHz,  $\text{CDCl}_3$ )  $\delta$  14.3, 21.1, 22.8, 25.3, 25.6, 25.9, 26.7, 27.6, 27.8, 28.1, 29.5, 29.54, 29.6, 29.78, 29.8(m), 30.1, 32.0, 32.3, 39.2, 48.7, 63.7, 65.5, 69.3, 70.3, 70.8, 71.2, 71.9, 72.2, 72.4, 73.3, 73.5, 73.7, 74.2, 74.5, 75.0, 75.8, 77.4, 79.5, 80.1, 82.5, 83.7, 84.5, 84.8, 98.4, 100.4, 100.6, 108.0, 109.7, 126.1, 127.6, 127.7, 128.0, 128.1, 128.2, 128.28, 128.3, 128.36, 128.4, 128.43, 128.5, 129.8, 130.1, 133.1, 133.5, 137.7, 138.1, 138.2, 138.25, 138.26, 138.4, 165.1, 166.6, 170.6, 171.1. MALDI-TOF calcd for  $\text{C}_{128}\text{H}_{169}\text{NNaO}_{23}(\text{M}+\text{Na})^+$ :  $m/z$  2111.1983. Found: 2111.1982. Anal. calcd for  $\text{C}_{128}\text{H}_{169}\text{NO}_{23}$ : C, 73.57; H, 8.15; N, 0.67. Found: C, 73.69; H, 8.30; N, 0.62.

**42b $\beta$**  : colorless oil,  $R_f = 0.18$  (hexane/EtOAc, 3:1, v/v); IR ( $\text{CHCl}_3$  film) 1281, 1686, 1728, 3388  $\text{cm}^{-1}$ ;  $[\alpha]_{\text{D}}^{20} +48.4$  ( $c$  0.1,  $\text{CHCl}_3$ );  $^1\text{H}$  NMR (250 MHz,  $\text{CDCl}_3$ )  $\delta$  0.84 (s, 3 H), 0.86 (s, 3 H), 0.88 (t,  $J = 6.3$  Hz, 3 H), 1.13–1.55 (m, 67 H), 1.65–2.04 (m, 4 H), 1.86 (s, 3 H), 3.45 (brs, 1 H), 3.59–3.71 (m, 8 H), 3.84–3.99 (m, 5 H), 4.05–4.13 (m, 2 H), 4.17 (d,  $J = 12.0$  Hz, 1 H), 4.25 (d,  $J = 11.5$  Hz, 1 H), 4.29–4.43 (m, 9 H), 4.50 (d,  $J = 1.7$  Hz, 1 H), 4.54–4.66 (m, 4 H), 4.68 (d,  $J = 11.6$  Hz, 1 H), 4.78 (d,  $J = 10.9$  Hz, 1 H), 4.92 (d,  $J = 4.6$  Hz, 1 H), 5.09 (t,  $J = 6.1$  Hz, 1 H), 5.19 (brs, 1 H), 5.34–5.38 (m, 1 H), 5.53 (s, 1 H), 5.76 (dd,  $J = 3.3, 8.6$  Hz, 1 H), 7.02 (d,  $J = 9.2$  Hz, 1 H), 7.12–7.56 (m, 41 H), 7.93–8.02 (m, 4 H);  $^{13}\text{C}$  NMR (63 MHz,  $\text{CDCl}_3$ )  $\delta$  13.8, 21.0, 22.8, 24.4, 25.1, 25.6, 25.8, 26.8, 27.6, 28.1, 28.6, 29.5, 29.6, 29.7, 29.79, 29.8(m), 30.1, 32.1, 39.2, 40.6, 45.9, 48.3, 65.5, 66.6, 68.2, 69.0, 70.8, 71.9, 72.2, 72.5, 72.9, 73.3, 73.6, 73.9, 74.2, 75.5, 76.3, 76.9, 77.0, 77.9, 79.1, 79.4, 80.1, 81.9, 83.0, 83.8, 84.4, 85.1, 98.6, 100.5, 104.5, 108.4, 109.8, 126.1, 127.6, 127.7, 127.8, 128.0, 128.03, 128.1, 128.2, 128.3, 128.4, 128.5, 128.6, 129.8, 133.1, 133.5, 137.6, 138.0,

138.2, 138.21, 138.4, 138.7, 165.5, 166.3, 170.4, 170.5. MALDI-TOF calcd for  $C_{128}H_{169}NNaO_{23}$  ( $M+Na$ )<sup>+</sup>:  $m/z$  2111.1983. Found: 2111.1982. Anal. calcd for  $C_{128}H_{169}NO_{23}$ : C, 73.57; H, 8.15; N, 0.67. Found: C, 73.62; H, 8.42; N, 0.67.

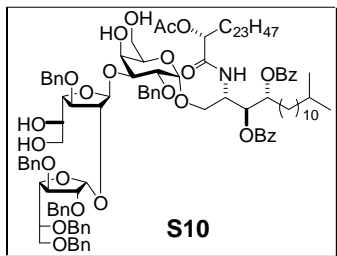

**Compound S10.** To a solution of **42aa** (110 mg, 0.0526 mmol) in  $CH_2Cl_2$  (8 mL) was added trifluoroacetic acid (2 mL). The resulting solution was stirred at room temperature for 30 min. The reaction mixture was diluted with  $CH_2Cl_2$  (50 mL), washed with saturated aqueous  $NaHCO_3$  ( $2 \times 50$  mL) and brine (50 mL), dried ( $MgSO_4$ ), and concentrated in vacuo. The residue was purified by silica gel flash column chromatography (hexane/EtOAc, 1:2, v/v) to afford the title compound **S10** (92 mg, 0.0469 mmol, 89%) as a colorless oil.:  $R_f = 0.2$  (hexane/EtOAc, 1:2, v/v); IR ( $CHCl_3$  film) 1285, 1459, 1678, 1740, 3484  $cm^{-1}$ ;  $[\alpha]_D^{20} +47.5$  ( $c$  0.5,  $CHCl_3$ );  $^1H$  NMR (250 MHz,  $CDCl_3$ )  $\delta$  0.83 (s, 3 H), 0.86 (s, 3 H), 0.88 (t,  $J = 6.3$  Hz, 3 H), 1.05–1.55 (m, 61 H), 1.78–1.97 (m, 4 H), 2.13 (s, 3 H), 2.36 (brs, 1 H), 2.81 (brs, 1 H), 2.95 (brs, 1 H), 3.46–3.72 (m, 8 H), 3.82–4.20 (m, 12 H), 4.33–4.47 (m, 9 H), 4.53–4.57 (m, 4 H), 4.64–4.69 (m, 2 H), 4.88 (d,  $J = 4.2$  Hz, 1 H), 5.04 (t,  $J = 6.1$  Hz, 1 H), 5.11 (brs, 1 H), 5.19–5.25 (m, 1 H), 5.88 (d,  $J = 9.4$  Hz, 1 H), 7.13–7.46 (m, 36 H), 7.89 (d,  $J = 7.4$  Hz, 2 H), 7.97 (d,  $J = 7.3$  Hz, 2 H), 8.03 (d,  $J = 9.9$  Hz, 1 H);  $^{13}C$  NMR (63 MHz,  $CDCl_3$ )  $\delta$  14.2, 21.1, 22.76, 22.8, 25.4, 25.8, 27.4, 27.5, 28.0, 29.46, 29.5, 29.6, 29.7, 29.76, 29.8(m), 30.0, 32.0, 32.2, 39.1, 48.7, 62.4, 63.7, 69.7, 70.3, 70.6, 71.4, 72.1, 72.5, 72.6, 73.3, 73.6, 73.7, 74.8,

75.4, 75.5, 76.9, 77.4, 79.3, 80.2, 80.4, 83.8, 85.1, 97.9, 100.6, 105.8, 127.6, 127.7, 127.9, 128.0, 128.05, 128.18, 128.2, 128.5, 128.6, 128.65, 128.7, 128.9, 133.3, 133.5, 137.2, 137.7, 138.1, 138.2, 165.3, 167.3, 170.8, 171.2. MALDI-TOF calcd for  $C_{118}H_{161}NNaO_{23}$  ( $M+Na$ )<sup>+</sup>:  $m/z$  1983.1357. Found: 1983.1356.

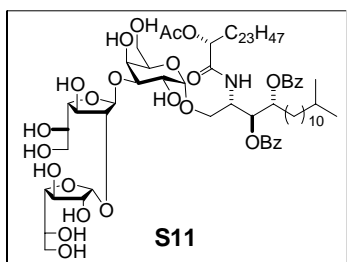

**Compound S11.** Compound **S10** (38 mg, 0.019 mmol) was stirred under hydrogen atmosphere using a balloon in the presence of Pd/C (10%, 30 mg) in MeOH–CH<sub>2</sub>Cl<sub>2</sub>–AcOH (5:3:2, v/v/v, 5 mL) at room temperature for 3 h. The reaction mixture was filtered through Celite® and concentrated. The residue was purified by column chromatography on Iatrobeds® (CHCl<sub>3</sub>/MeOH, 5:1, v/v, to 3:1, v/v) to afford the title compound **S11** (23 mg, 0.016 mmol, 84%) as a colorless oil.:  $R_f$  = 0.5 (CHCl<sub>3</sub>/MeOH, 3:1, v/v); IR (CHCl<sub>3</sub> film) 1266, 1678, 1732, 3367 cm<sup>-1</sup>;  $[\alpha]_D^{20}$  +48.6 (*c* 0.4, CHCl<sub>3</sub>); <sup>1</sup>H NMR (500 MHz, CD<sub>3</sub>OD + CDCl<sub>3</sub>) δ 0.85 (s, 3 H), 8.6 (s, 3 H), 0.89 (t, *J* = 6.5 Hz, 3 H), 1.08–1.52 (m, 61 H), 1.83–2.06 (m, 4 H), 2.22 (s, 3 H), 3.56–3.77 (m, 10 H), 3.78–3.84 (m, 2 H), 3.85–3.93 (m, 3 H), 3.97 (dd, *J* = 4.5, 8.0 Hz, 1 H), 3.99–4.05 (m, 1 H), 4.05–4.10 (m, 1 H), 4.12 (t, *J* = 7.8 Hz, 1 H), 4.14–4.22 (m, 2 H), 4.71 (d, *J* = 3.5 Hz, 1 H), 5.01 (t, *J* = 6.3 Hz, 1 H), 5.04 (d, *J* = 4.0 Hz, 1 H), 5.19 (brs, 1 H), 5.33–5.35 (m, 1 H), 5.78 (d, *J* = 8.5 Hz, 1 H), 7.39–7.65 (m, 6 H), 7.92 (d, *J* = 7.5 Hz, 2 H), 8.01 (d, *J* = 7.5 Hz, 2 H), 8.32 (d, *J* = 9.0 Hz, 1 H); <sup>13</sup>C NMR (125 MHz, CD<sub>3</sub>OD + CDCl<sub>3</sub>) δ 14.3, 21.0, 22.9, 23.1, 26.5, 26.1, 27.8, 28.4, 29.8, 30.1(m), 30.3,

32.3, 32.4, 39.5, 62.3, 63.7(2), 63.8(2), 68.2, 69.8, 70.2, 71.3, 71.8, 72.0, 72.6, 74.6, 75.0, 75.4, 75.7, 82.7(2), 88.4, 101.5, 101.8, 108.1, 128.9, 129.1, 129.8, 130.2, 133.8, 134.2, 166.4, 167.3, 172.0, 172.1. MALDI-TOF calcd for  $C_{76}H_{125}NNaO_{23}$  ( $M+Na$ )<sup>+</sup>:  $m/z$  1442.8540. Found: 1442.8540.

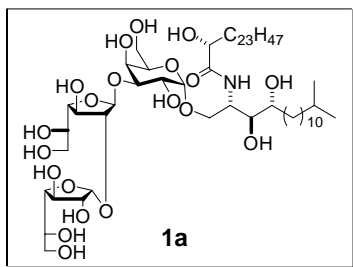

**Agelagalastatin 1a (major component).** A solution of compound **S11** (18 mg, 0.0127 mmol) and sodium methoxide (10 mg, 0.185 mmol) in  $CH_2Cl_2$ –MeOH (1:2, v/v, 6 mL) was stirred at room temperature for 2 h. The reaction mixture was neutralized with DOWEX CCR-3 ( $H^+$  mode) resin, filtered through Celite®, and concentrated. The residue was purified by washing with diethyl ether ( $2 \times 30$  mL), and concentrated in vacuo to afford the title compound agelagalastatin **1a** (14 mg, 0.012 mmol, 94%) as a colorless amorphous powder.:  $R_f = 0.08$  ( $CHCl_3/MeOH$ , 3:1, v/v);  $[\alpha]_D^{20} +58.8$  ( $c$  0.65,  $CH_3OH$ );  $^1H$  NMR (500 MHz,  $C_5D_5N$ )  $\delta$  0.84–0.85 (m, 9 H), 1.12–1.50 (m, 57 H), 1.63–1.83 (m, 3 H), 1.87–2.08 (m, 3 H), 2.16–2.34 (m, 2 H), 4.12–4.51 (m, 13 H), 4.55–4.68 (m, 5 H), 4.69–4.76 (m, 2 H), 5.14 (t,  $J = 8.0$  Hz, 1 H), 5.23–5.26 (m, 1 H), 5.47 (d,  $J = 4.0$  Hz, 1 H), 5.61 (d,  $J = 4.5$  Hz, 1 H), 5.78 (brs, 1 H), 8.58 (d,  $J = 9.5$  Hz, 1 H);  $^{13}C$  NMR (125 MHz,  $C_5D_5N$ )  $\delta$  14.3, 22.8, 22.9, 25.9, 26.5, 27.7, 28.2, 29.6, 30.0(m), 31.17, 30.2, 30.4, 32.1, 34.1, 35.6, 39.2, 51.1, 62.7, 64.4(2), 68.5, 68.9, 70.4, 71.9, 72.5(2), 72.8, 75.2, 75.5, 76.2, 79.1, 80.0, 82.5, 83.3, 88.7, 101.4, 101.7, 108.5, 175.3. HRMS (FAB) calcd for  $C_{60}H_{115}NNaO_{20}$  ( $M+Na$ )<sup>+</sup>:  $m/z$  1192.7910. Found: 1192.7921.

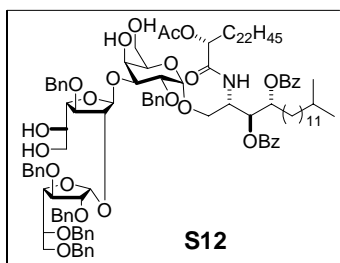

**Compound S12.** The title compound **S12** was prepared from compound **42ba** (90 mg, 0.043 mmol) in the same procedure as described for **S10**: 74 mg (0.00377 mmol, 88%); colorless oil,  $R_f = 0.2$  (hexane/EtOAc, 1:2, v/v); IR (CHCl<sub>3</sub> film) 1285, 1458, 1678, 1741, 3452 cm<sup>-1</sup>;  $[\alpha]_D^{20} +45.6$  (*c* 0.3, CHCl<sub>3</sub>); <sup>1</sup>H NMR (250 MHz, CDCl<sub>3</sub>)  $\delta$  0.84 (s, 3 H), 0.86 (s, 3 H), 0.88 (t, *J* = 6.3 Hz, 3 H), 1.01–1.55 (m, 61 H), 1.72–2.04 (m, 6 H), 2.13 (s, 3 H), 2.78–3.03 (m, 2 H), 3.46–3.71 (m, 8 H), 3.82–3.96 (m, 7 H), 3.97–4.03 (m, 2 H), 4.07–4.16 (m, 3 H), 4.31–4.40 (m, 6 H), 4.42 (brs, 1 H), 4.44–4.49 (m, 2 H), 4.52–4.64 (m, 4 H), 4.66–4.69 (m, 1 H), 4.88 (d, *J* = 4.4 Hz, 1 H), 5.03 (t, *J* = 6.1 Hz, 1 H), 5.13 (brs, 1 H), 5.18–5.23 (m, 1 H), 5.89 (d, *J* = 10.4 Hz, 1 H), 7.10–7.62 (m, 36 H), 7.89 (d, *J* = 7.5 Hz, 2 H), 7.97 (d, *J* = 7.5 Hz, 2 H), 8.09 (d, *J* = 9.9 Hz, 1 H); <sup>13</sup>C NMR (63 MHz, CDCl<sub>3</sub>)  $\delta$  14.3, 21.1, 22.8, 25.4, 25.9, 27.4, 27.6, 28.1, 29.5, 29.9(m), 30.1, 32.1, 32.2, 39.2, 48.7, 62.5, 63.7, 69.9, 70.3, 70.6, 71.4, 72.1, 72.6, 73.3, 73.7, 74.9, 75.2, 75.5, 77.4, 79.3, 80.1, 80.4, 83.8, 84.0, 85.2, 97.9, 100.5, 105.8, 127.6, 127.8, 127.9, 128.1, 128.3, 128.5, 128.8, 129.6, 129.9, 133.4, 133.6, 137.2, 137.7, 138.1, 165.4, 167.3, 170.8, 171.3. MALDI-TOF calcd for C<sub>118</sub>H<sub>161</sub>NNaO<sub>23</sub> (M+Na)<sup>+</sup>: *m/z* 1983.1357. Found: 1983.1360.

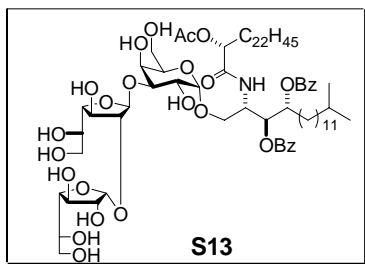

**Compound S13.** The title compound **S13** was prepared from compound **S12** (42 mg, 0.0214 mmol) in the same procedure as described for **S11**: 26 mg (0.0183 mmol, 86%); colorless oil,  $R_f = 0.5$  ( $\text{CHCl}_3/\text{MeOH}$ , 3:1, v/v); IR ( $\text{CHCl}_3$  film) 1266, 1682, 1731, 3343  $\text{cm}^{-1}$ ;  $[\alpha]_D^{20} +49.2$  ( $c$  0.4,  $\text{CHCl}_3$ );  $^1\text{H}$  NMR (500 MHz,  $\text{CD}_3\text{OD} + \text{CDCl}_3$ )  $\delta$  0.85 (s, 3 H), 8.6 (s, 3 H), 0.89 (t,  $J = 6.0$  Hz, 3 H), 1.08–1.52 (m, 61 H), 1.81–2.10 (m, 4 H), 2.22 (s, 3 H), 3.57–3.77 (m, 10 H), 3.78–3.84 (m, 2 H), 3.85–3.93 (m, 3 H), 3.97 (dd,  $J = 4.5, 8.0$  Hz, 1 H), 3.99–4.04 (m, 1 H), 4.06–4.10 (m, 1 H), 4.12 (t,  $J = 7.5$  Hz, 1 H), 4.14–4.21 (m, 2 H), 4.71 (d,  $J = 3.3$  Hz, 1 H), 5.00 (t,  $J = 6.0$  Hz, 1 H), 5.04 (d,  $J = 4.0$  Hz, 1 H), 5.19 (brs, 1 H), 5.33–5.35 (m, 1 H), 5.78 (d,  $J = 9.5$  Hz, 1 H), 7.39–7.66 (m, 6 H), 7.92 (d,  $J = 7.5$  Hz, 2 H), 8.01 (d,  $J = 7.5$  Hz, 2 H), 8.33 (brs, 1 H);  $^{13}\text{C}$  NMR (125 MHz,  $\text{CD}_3\text{OD} + \text{CDCl}_3$ )  $\delta$  14.3, 21.0, 22.9, 23.1, 26.7, 26.1, 27.9, 28.4, 29.8, 30.1(m), 30.4, 32.4, 32.5, 39.5, 62.3, 63.7(2), 63.8(2), 68.2, 69.8, 70.1, 71.3, 71.9, 72.0, 72.6, 74.7, 75.0, 75.4, 75.7, 82.7(2), 88.4, 101.6, 101.8, 108.1, 128.9, 129.2, 129.8, 130.2, 133.8, 134.2, 166.4, 167.4, 172.0, 172.1. MALDI-TOF calcd for  $\text{C}_{76}\text{H}_{125}\text{NNaO}_{23}$  ( $\text{M}+\text{Na}$ ) $^+$ :  $m/z$  1442.8540. Found: 1442.8540.

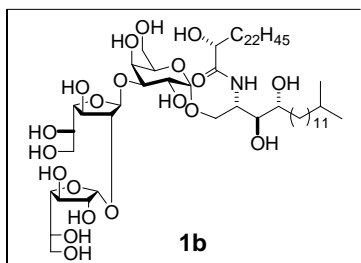

**Agelagalastatin 1b (minor component).** The title compound **1b** was prepared from compound **S13** (16 mg, 0.0113 mmol) in the same procedure as described for **1a**: 13 mg (0.0111 mmol, 98%); colorless amorphous powder,  $R_f = 0.08$  ( $\text{CHCl}_3/\text{MeOH}$ , 3:1, v/v);  $[\alpha]_D^{20} +59.8$  ( $c$  0.45,  $\text{CH}_3\text{OH}$ );  $^1\text{H}$  NMR (500 MHz,  $\text{C}_5\text{D}_5\text{N}$ )  $\delta$  0.84–0.85 (m, 9 H), 1.12–1.50 (m, 57 H), 1.63–1.83 (m, 3 H), 1.87–2.08 (m, 3 H), 2.16–2.34 (m, 2 H), 4.12–4.51 (m, 13 H), 4.55–4.68 (m, 5 H), 4.69–4.76 (m, 2 H), 5.14 (t,  $J = 8.0$  Hz, 1 H), 5.23–5.26 (m, 1 H), 5.47 (d,  $J = 4.0$  Hz, 1 H), 5.61 (d,  $J = 4.5$  Hz, 1 H), 5.78 (brs, 1 H), 8.58 (d,  $J = 9.5$  Hz, 1 H);  $^{13}\text{C}$  NMR (125 MHz,  $\text{C}_5\text{D}_5\text{N}$ )  $\delta$  14.2, 22.7, 22.9, 25.9, 26.5, 27.7, 28.2, 29.6, 30.0(m), 30.4, 32.1, 34.0, 35.6, 39.2, 51.1, 62.7, 64.4(2), 68.5, 68.9, 70.4, 71.9, 72.4, 72.5, 72.8, 75.2, 75.4, 76.2, 79.0, 80.0, 82.4, 83.2, 88.7, 101.3, 101.7, 108.5, 175.3. HRMS (FAB) calcd for  $\text{C}_{60}\text{H}_{115}\text{NNaO}_{20} (\text{M}+\text{Na})^+$ :  $m/z$  1192.7910. Found: 1192.7914.

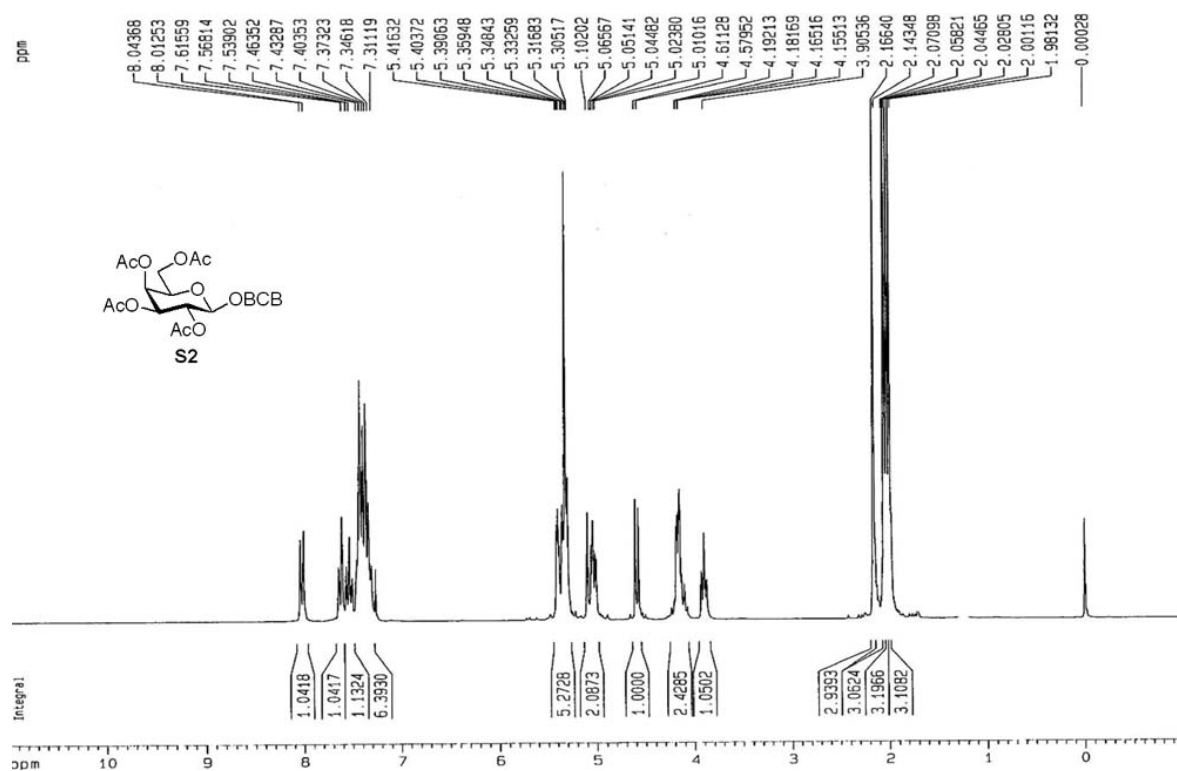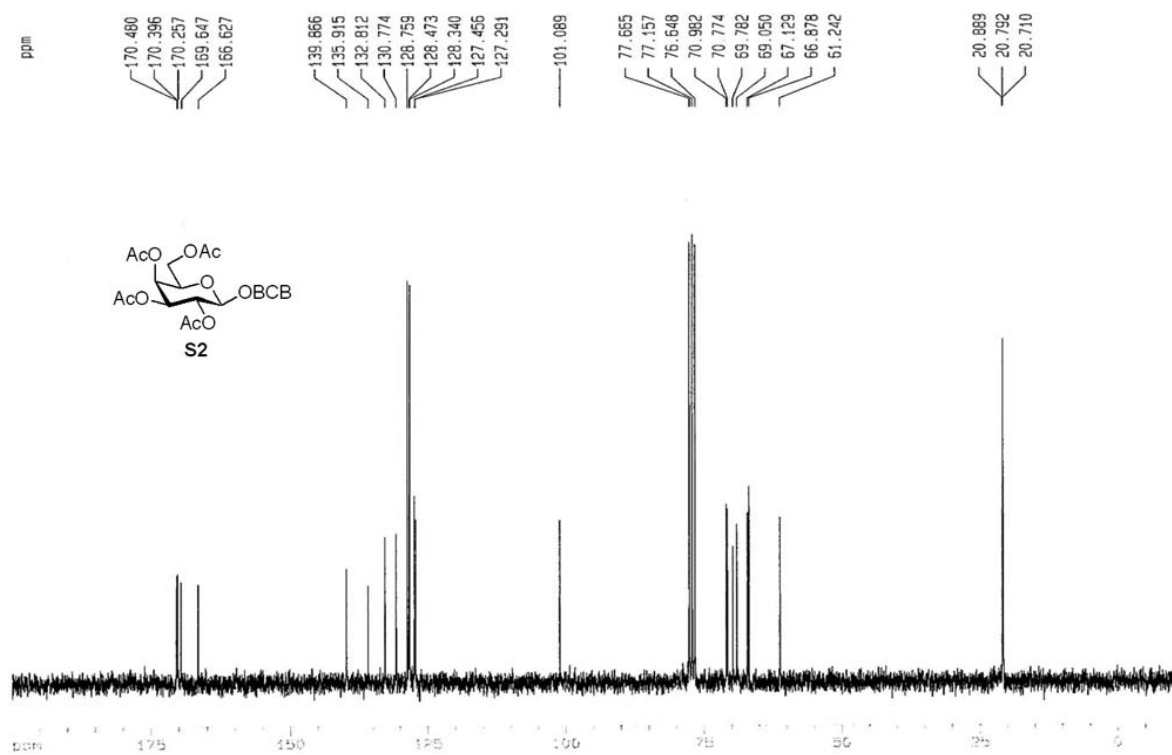

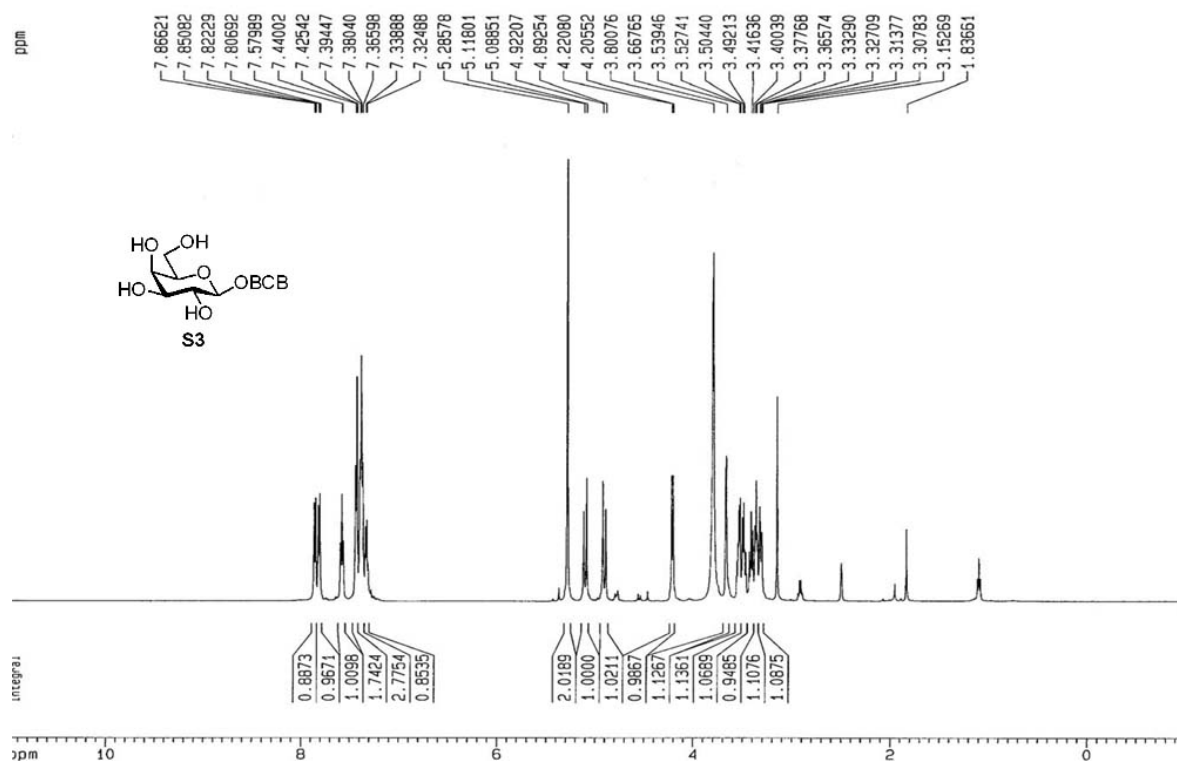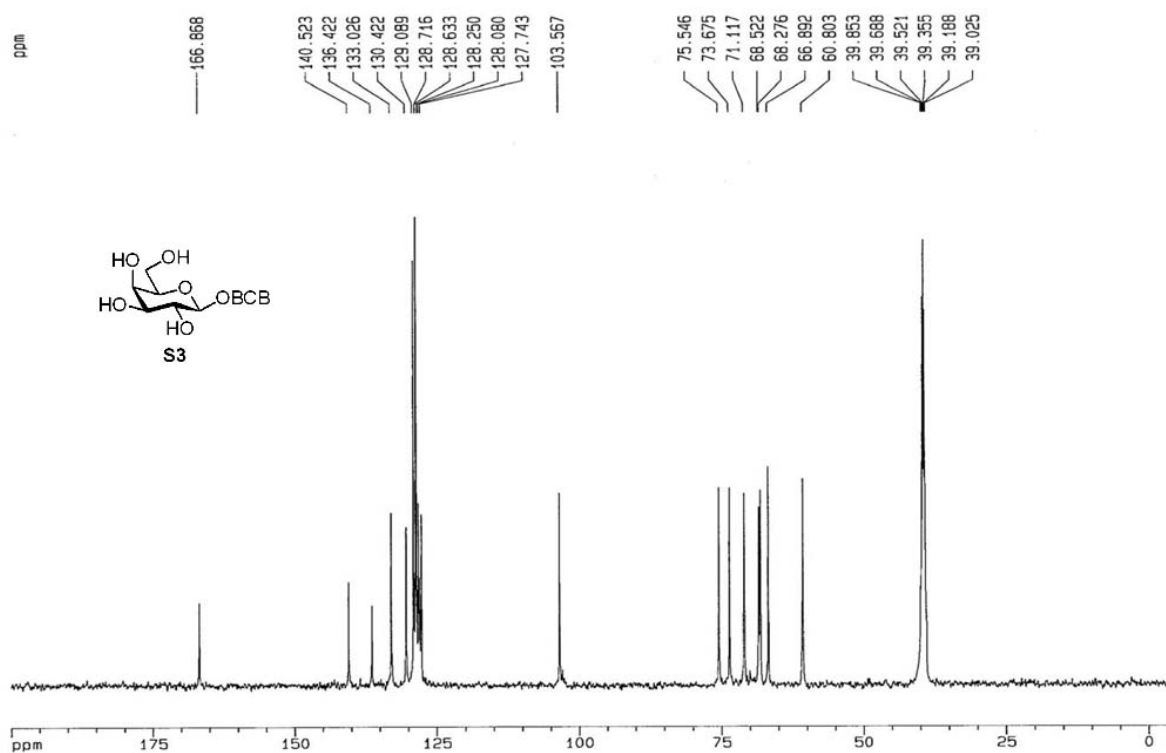

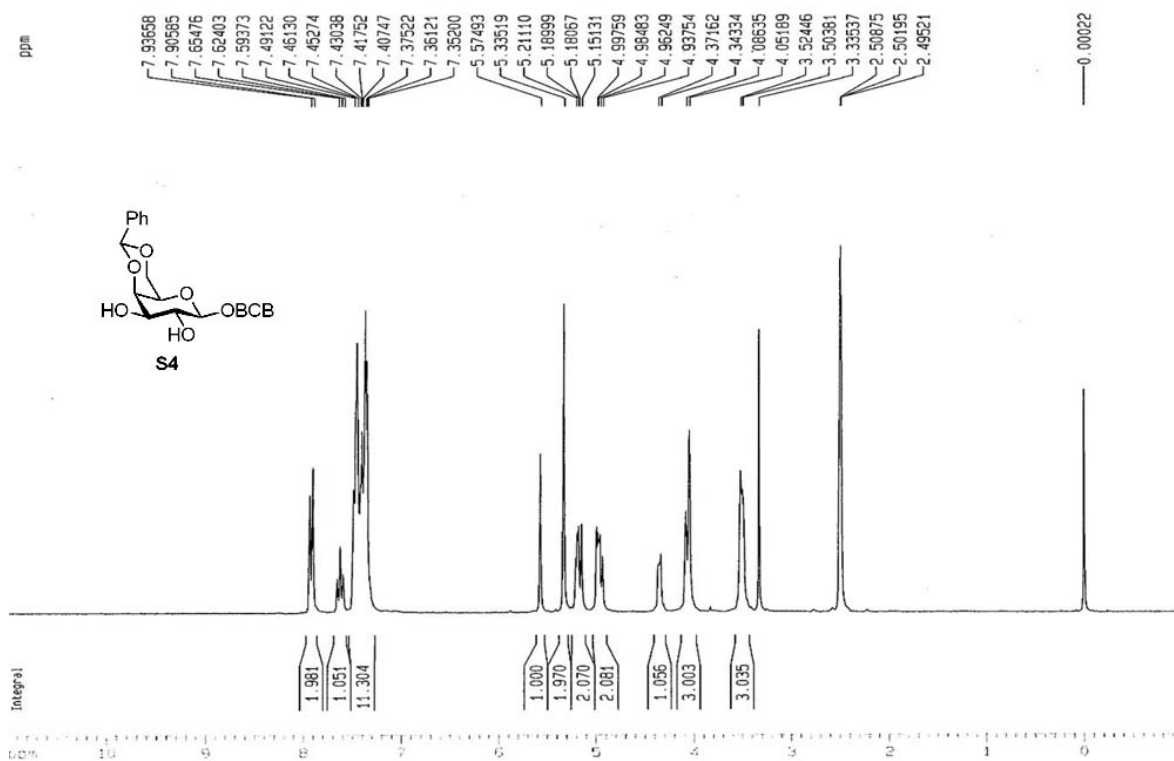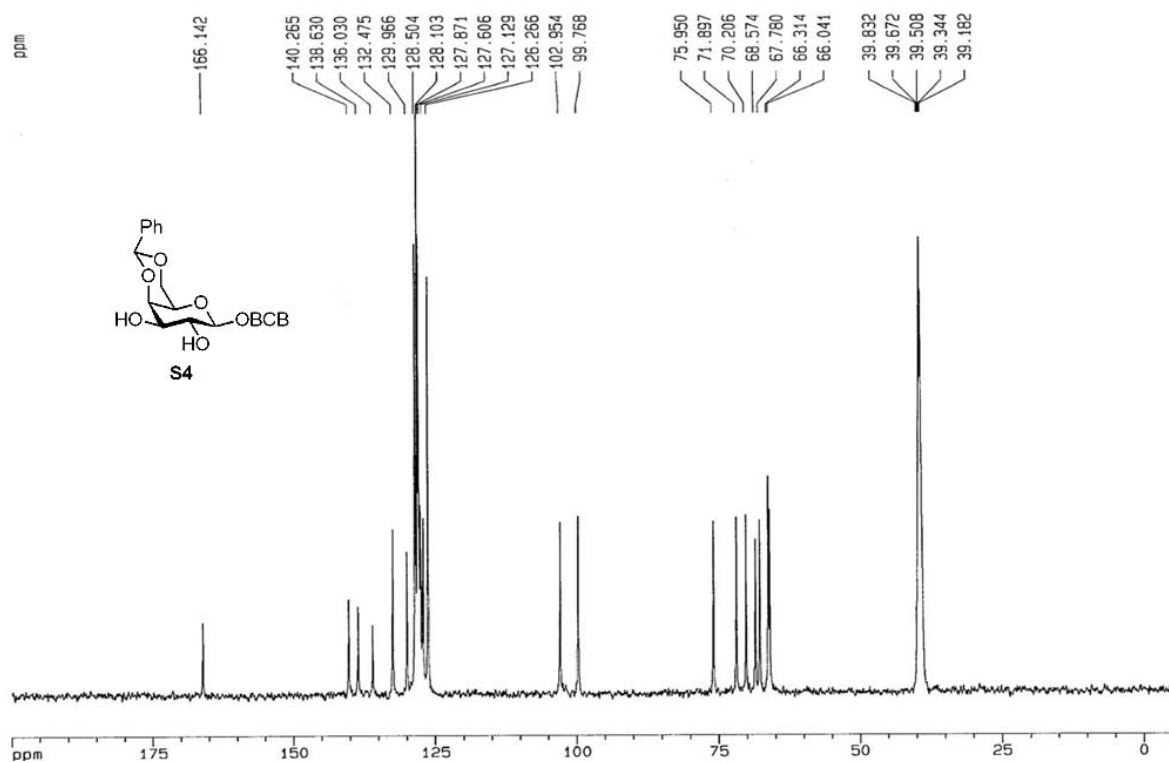

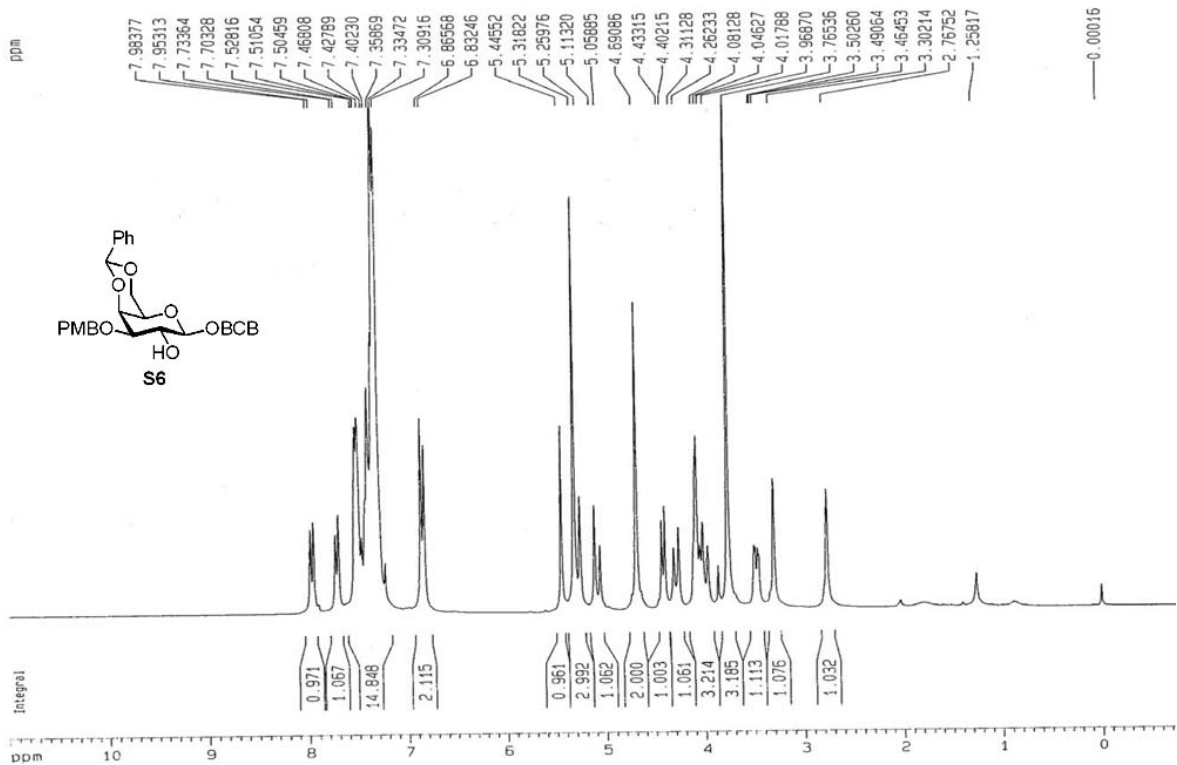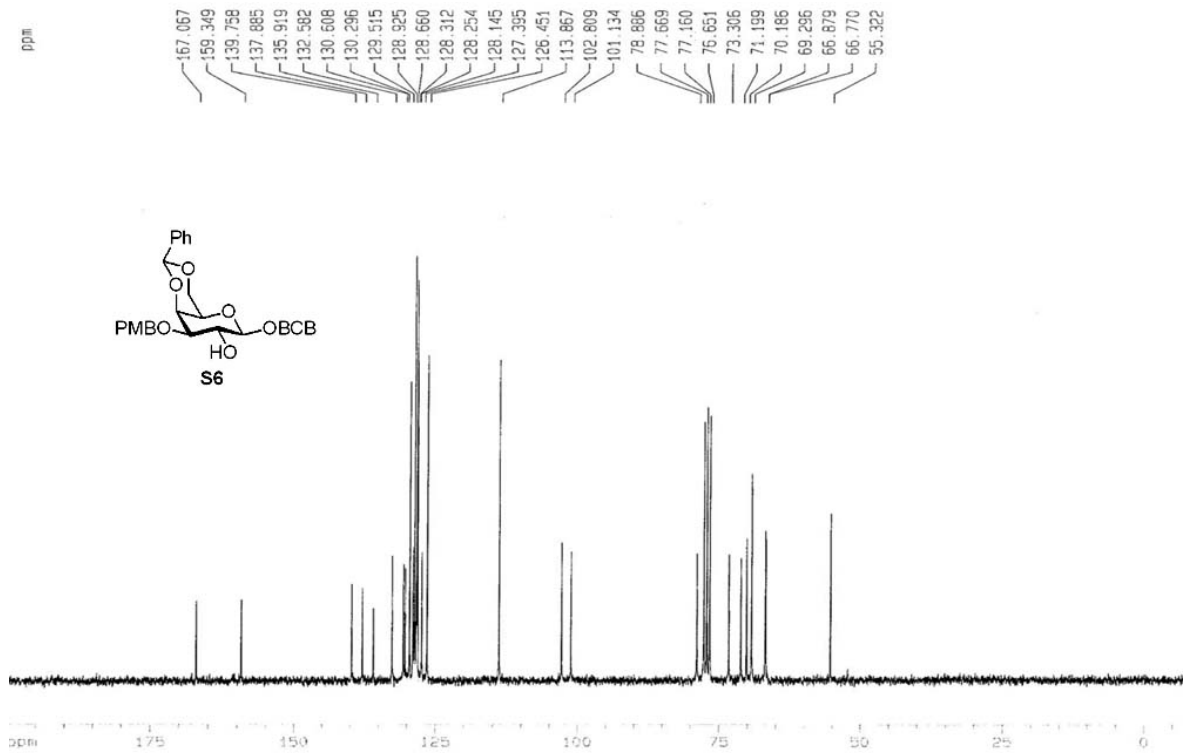

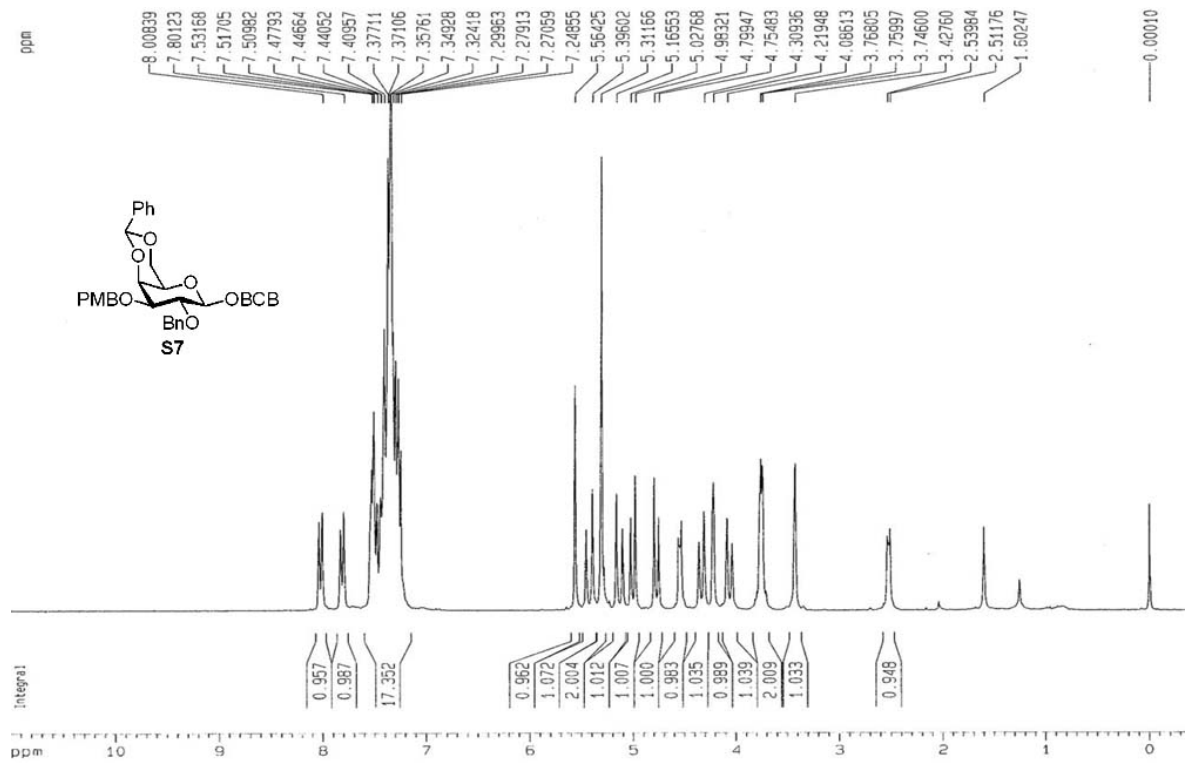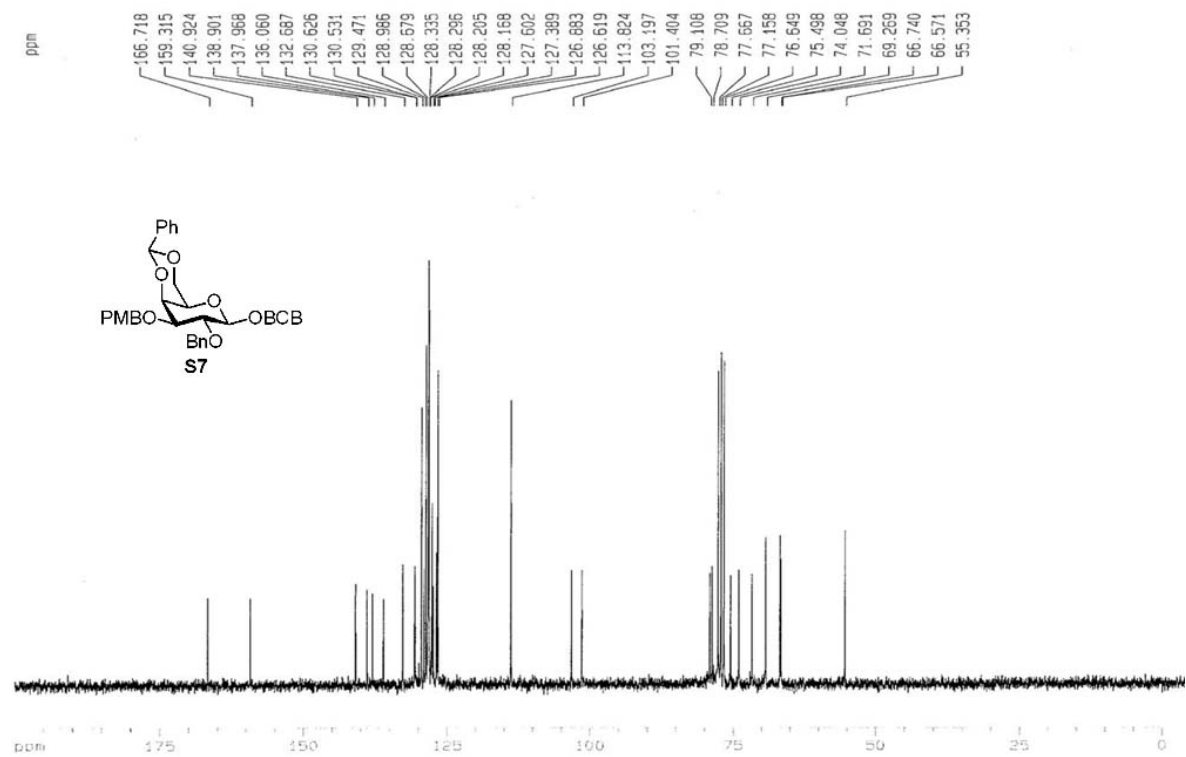

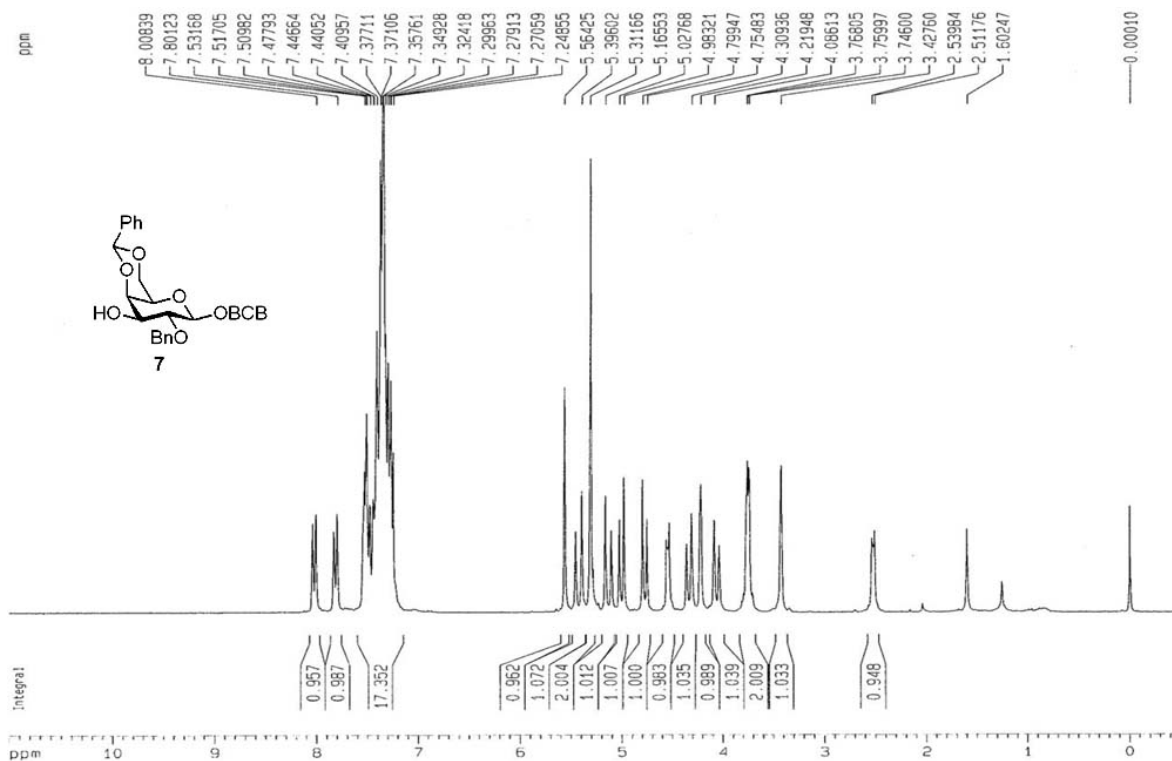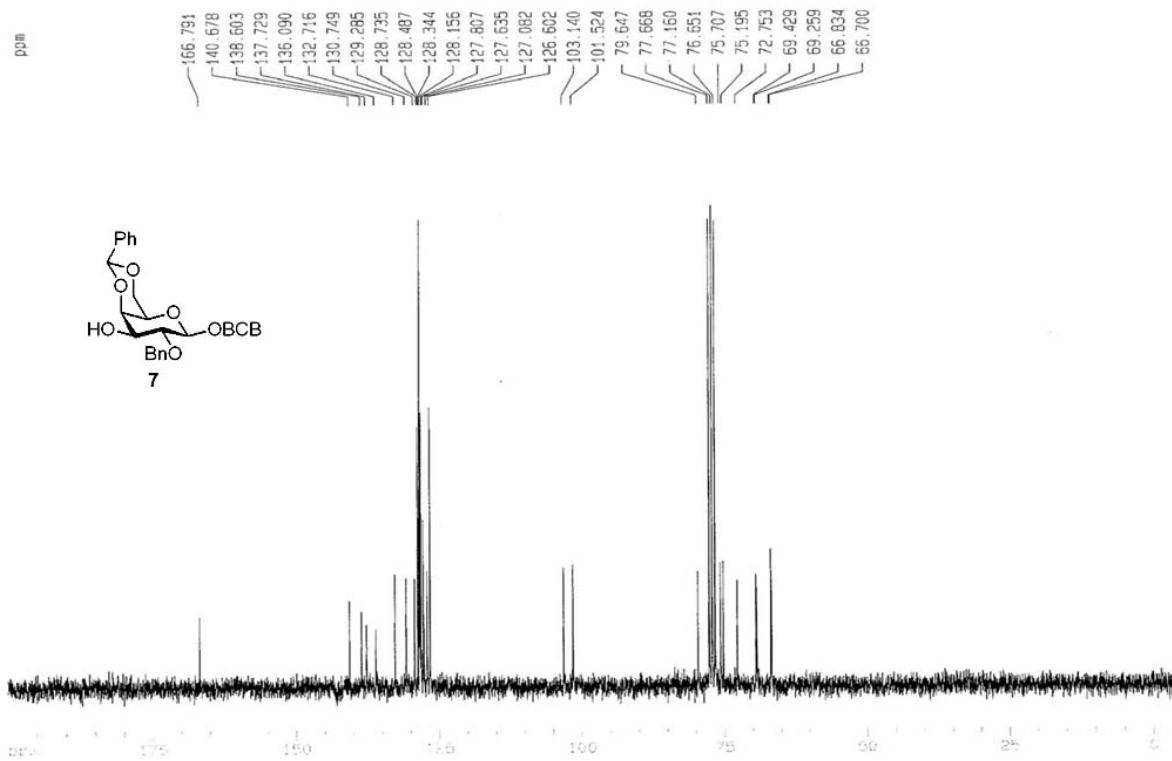

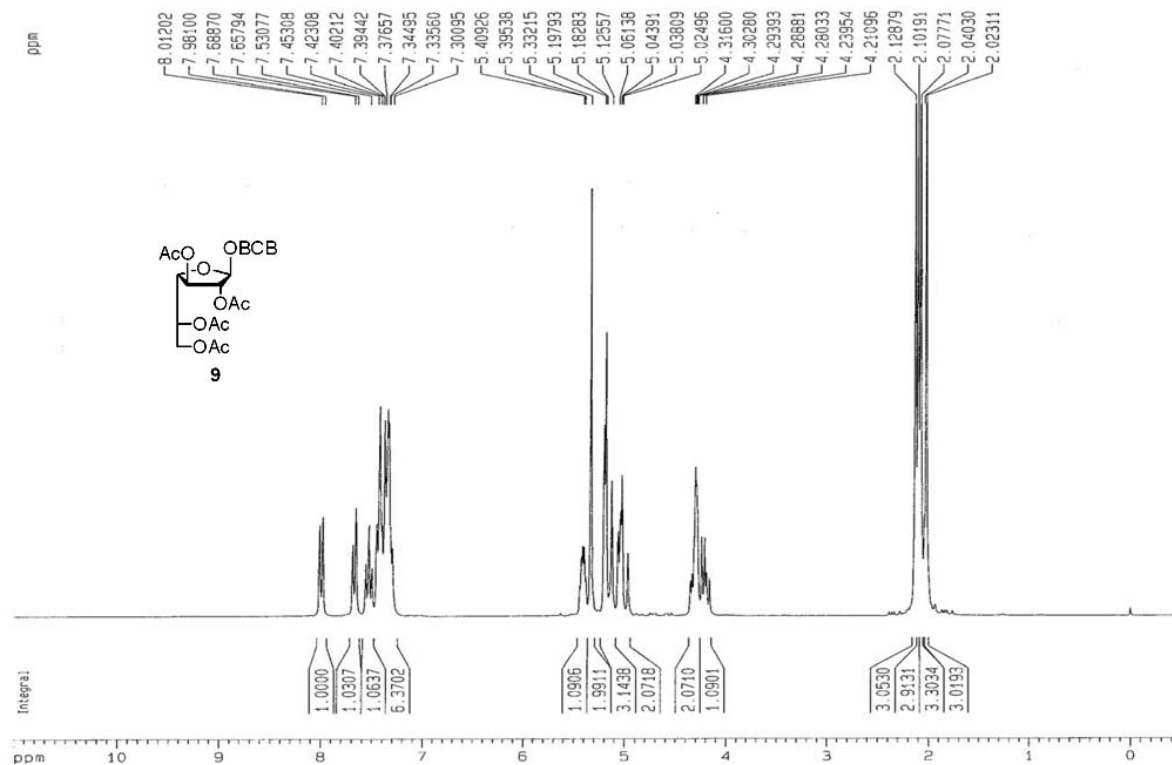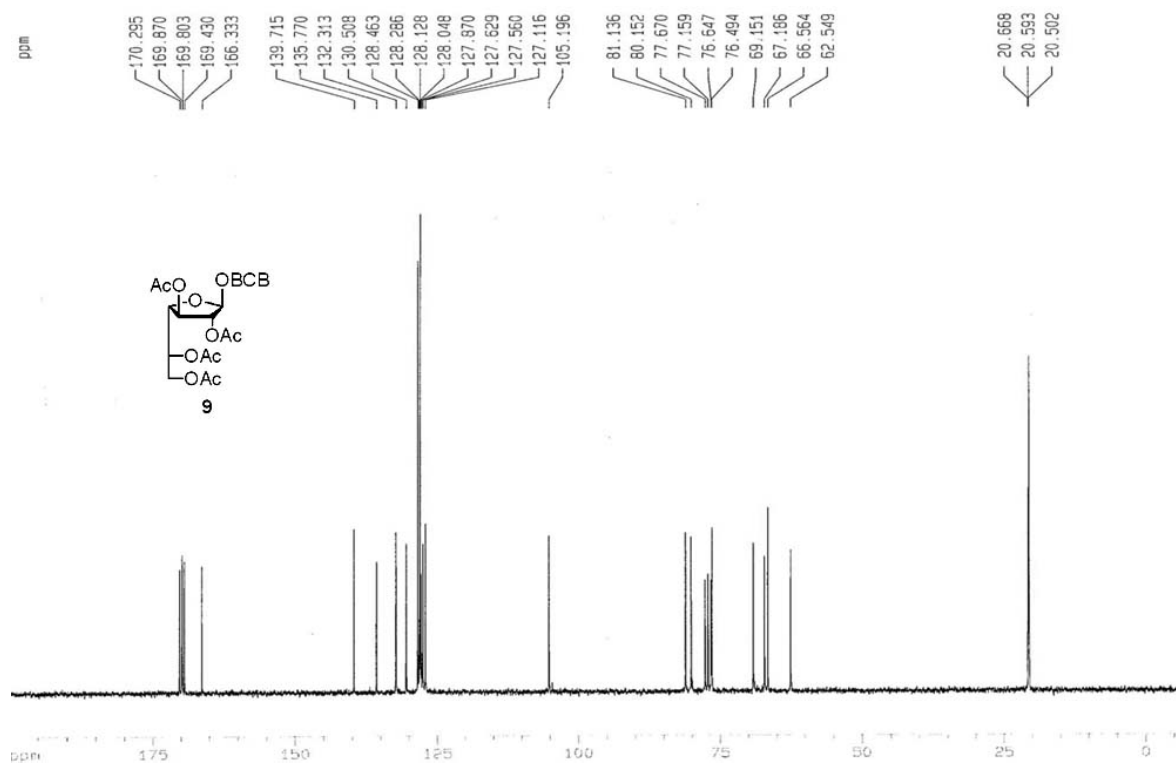

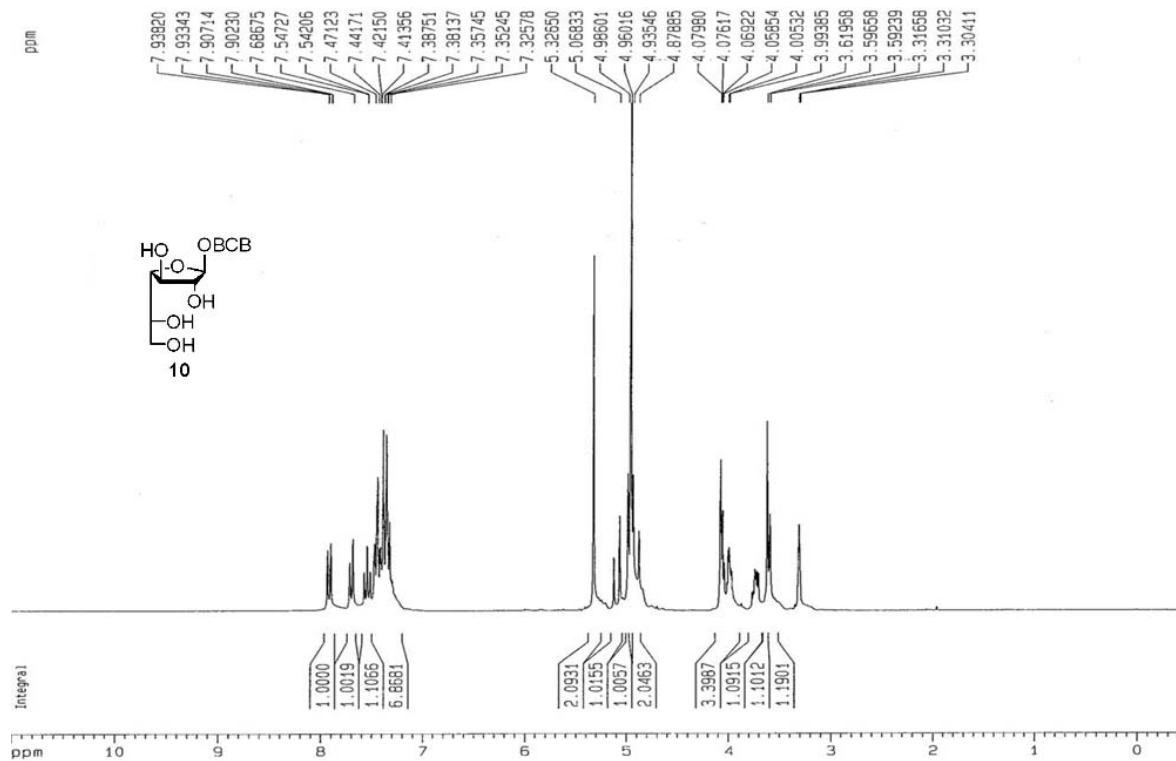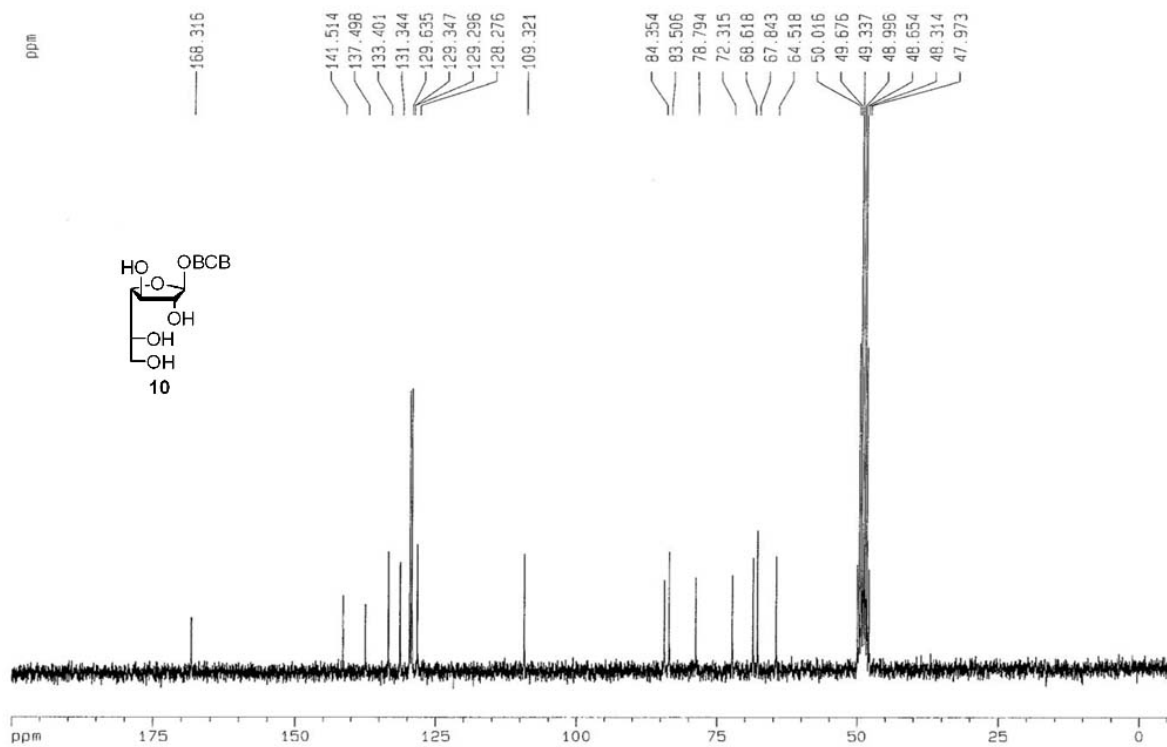

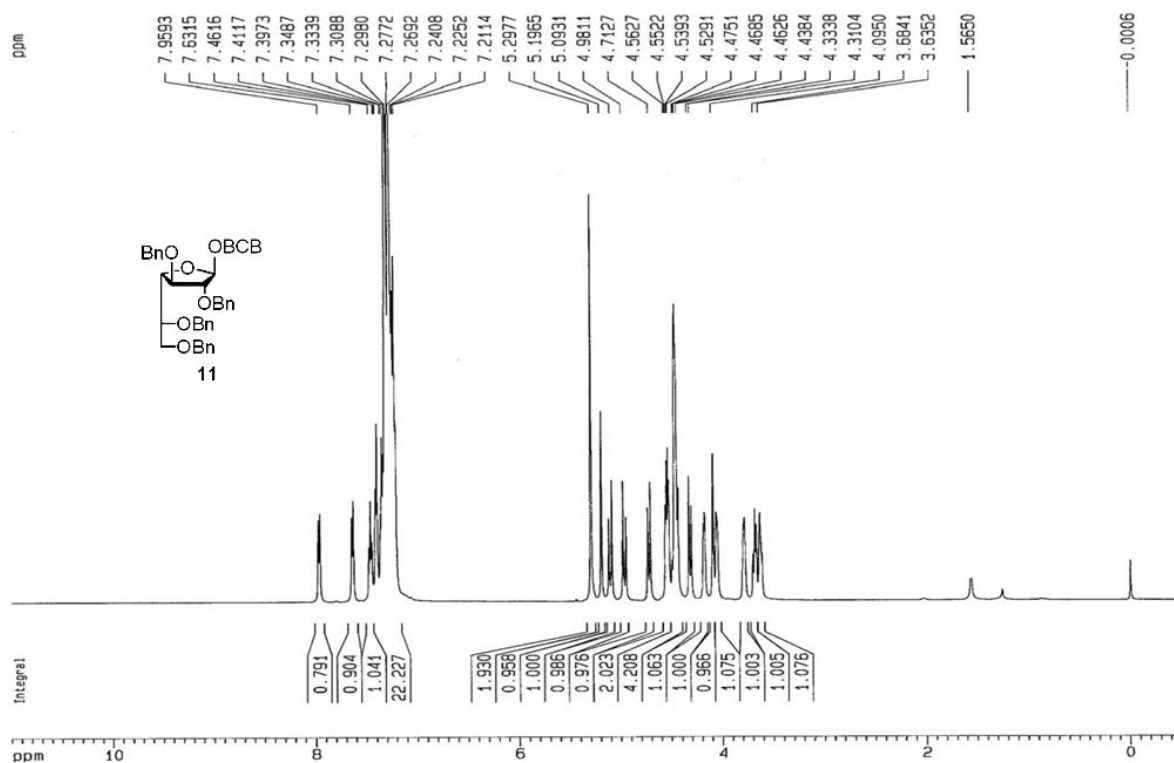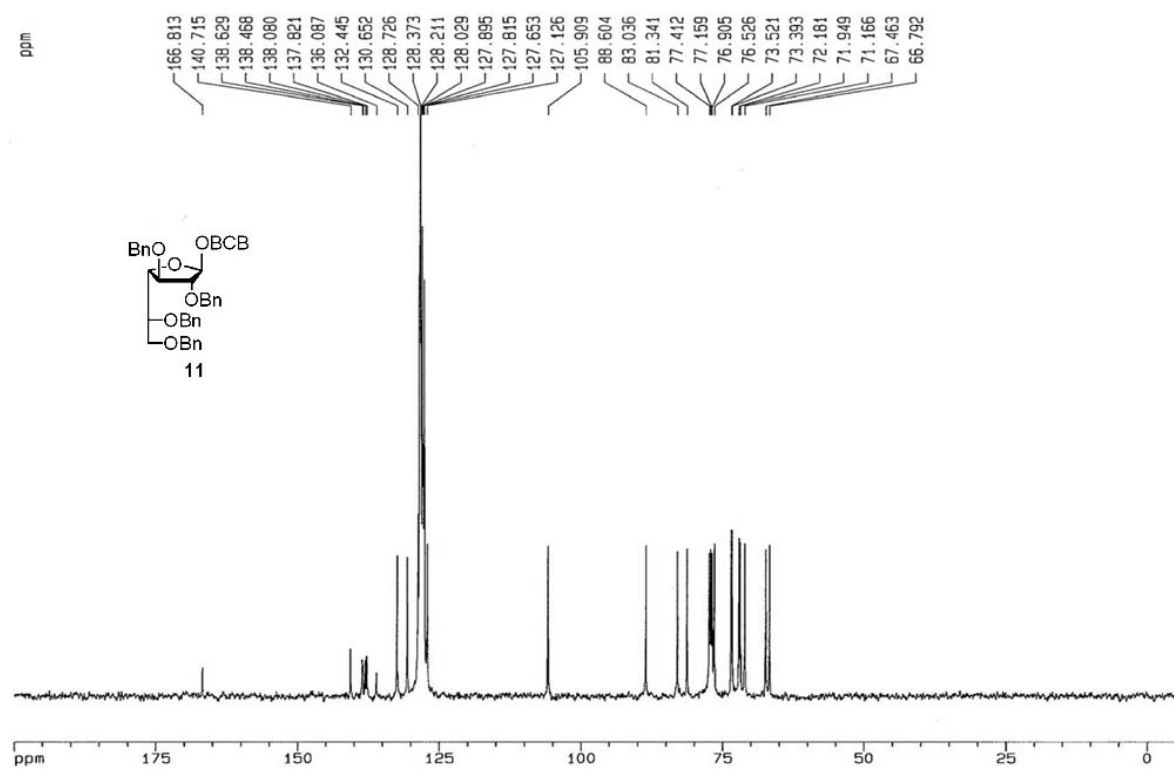

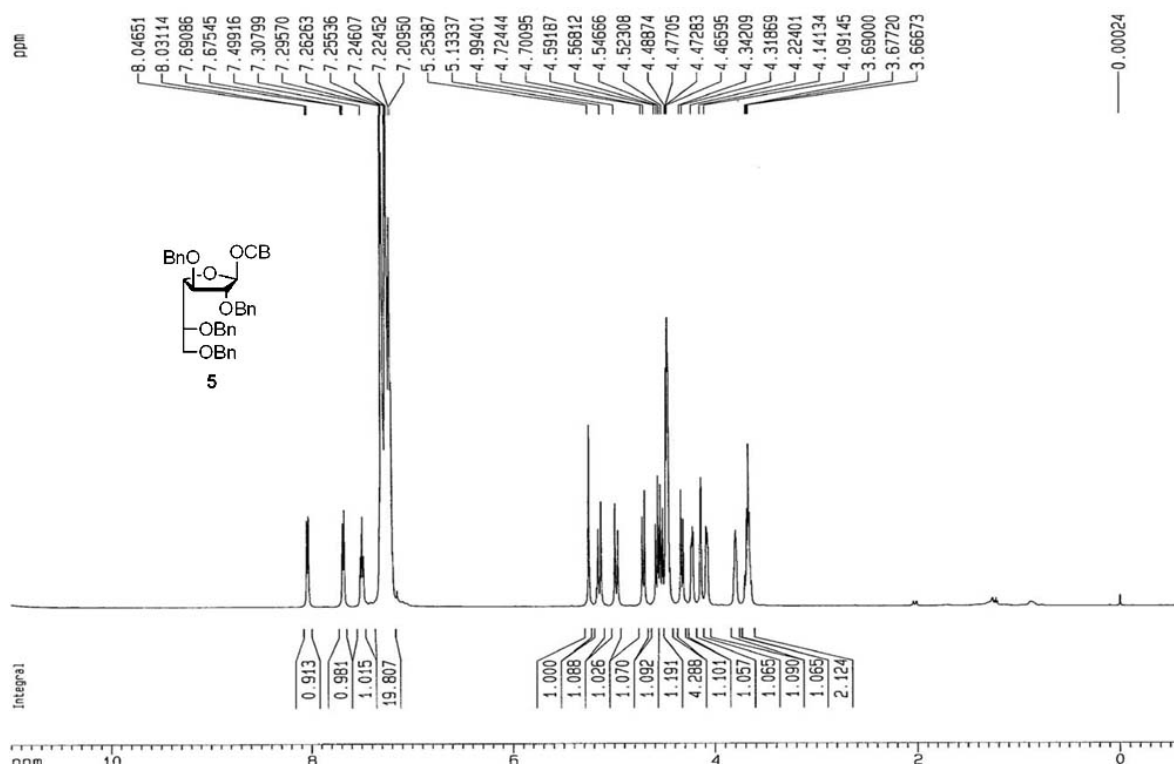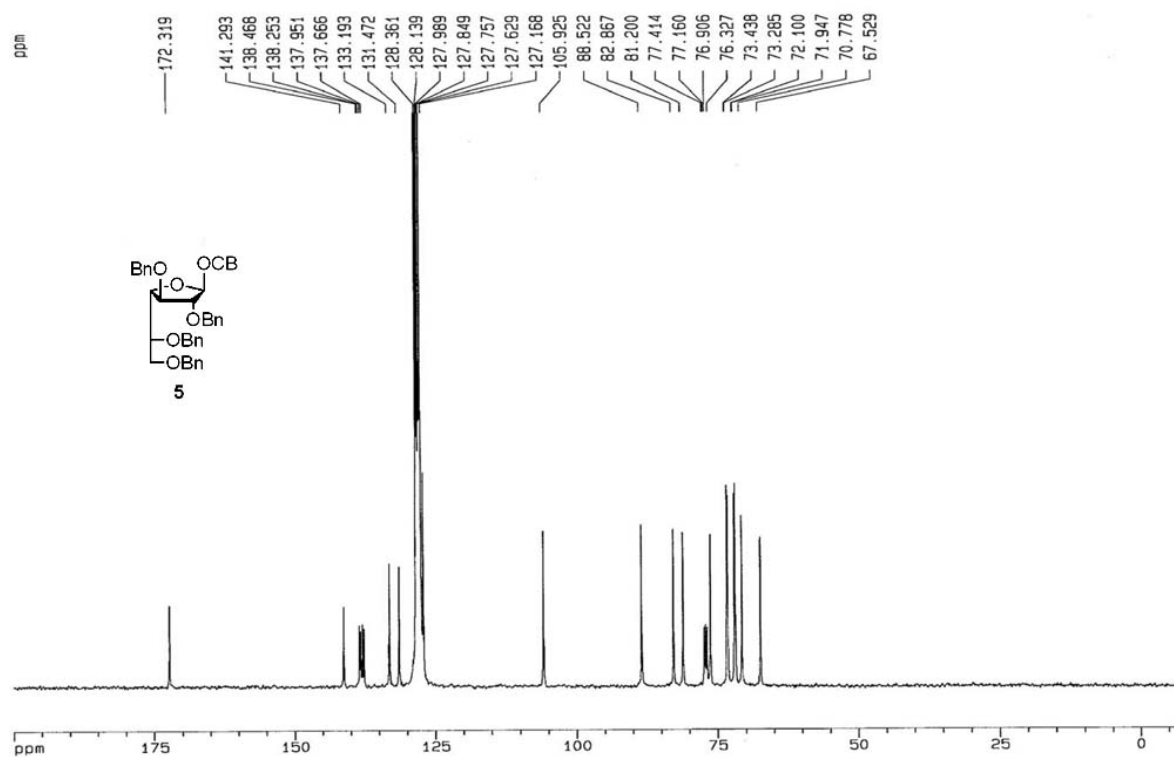

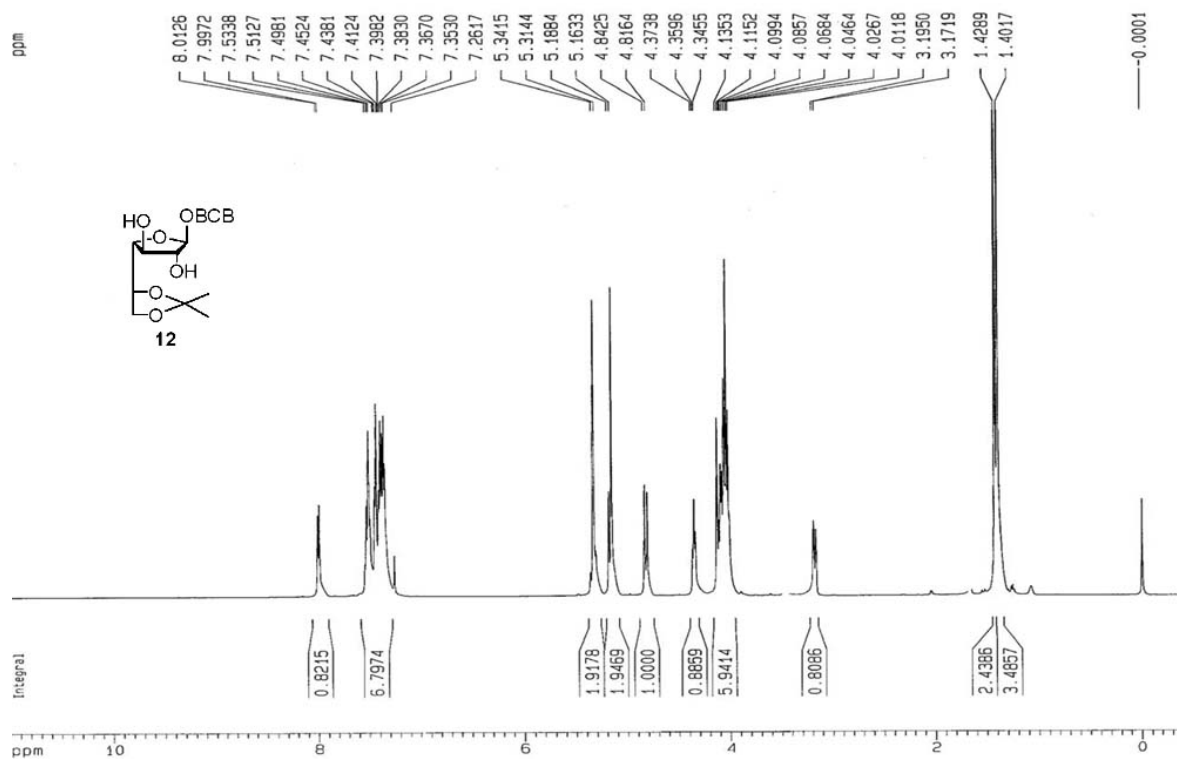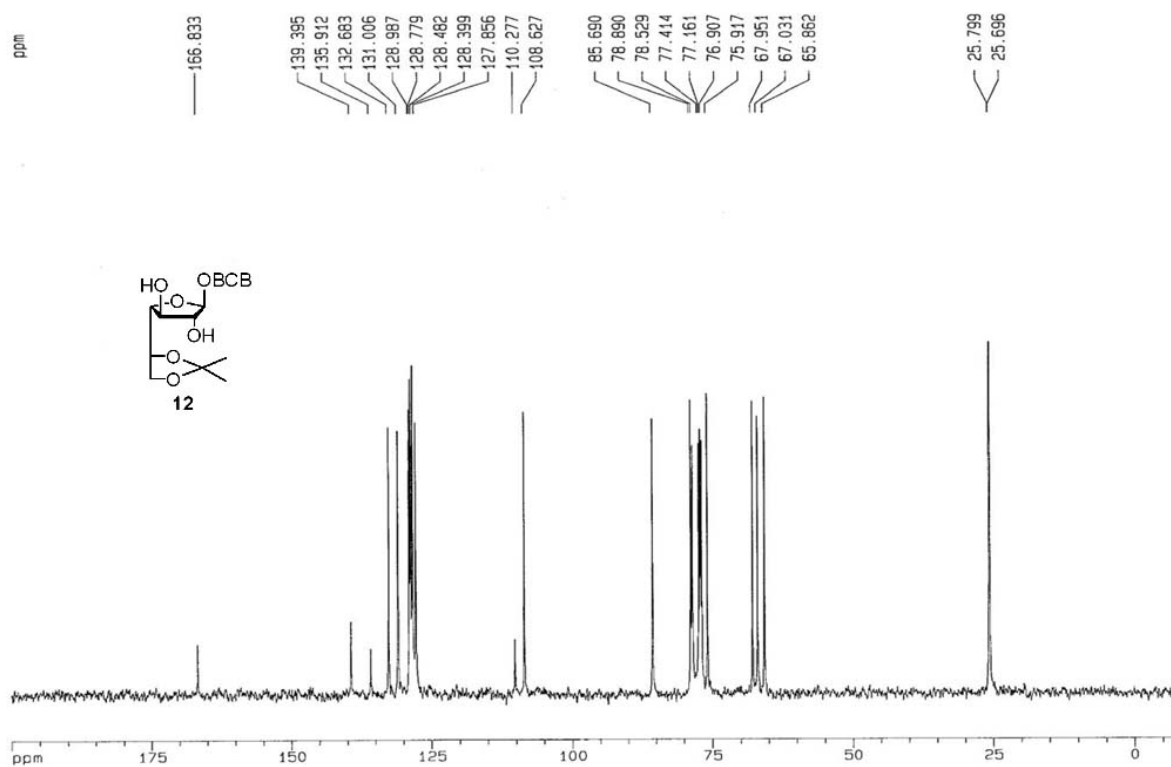

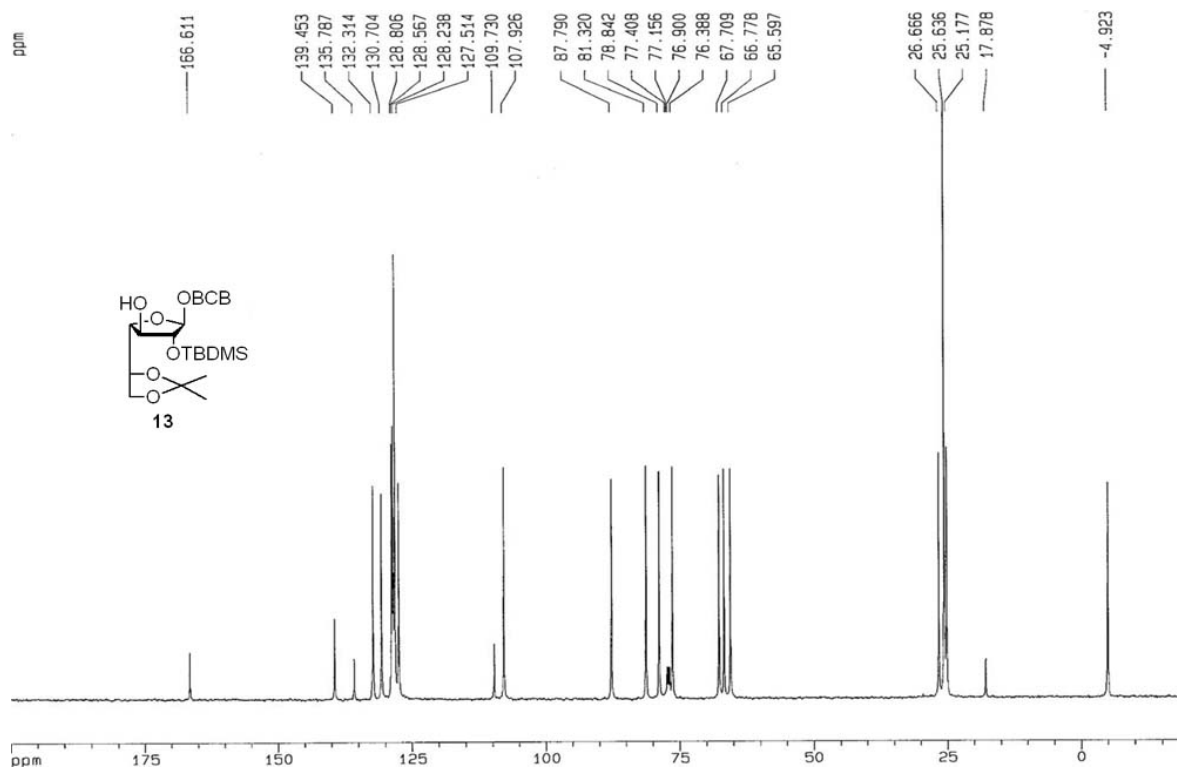

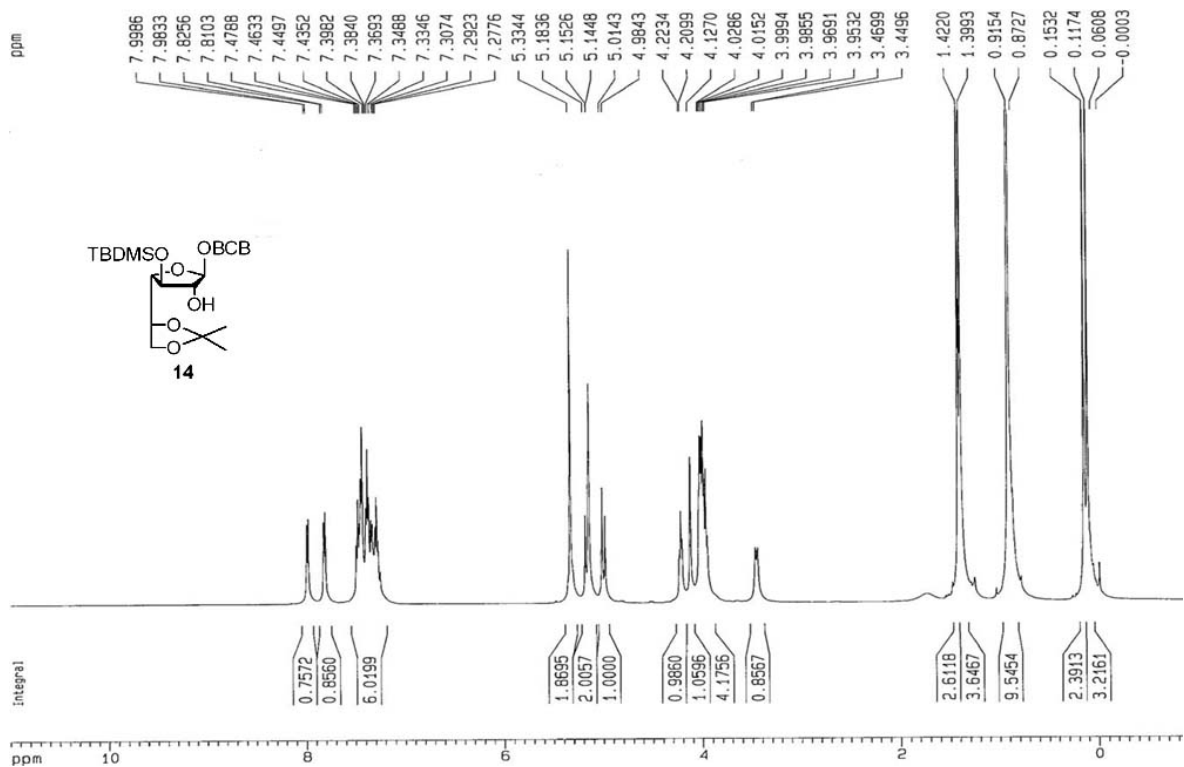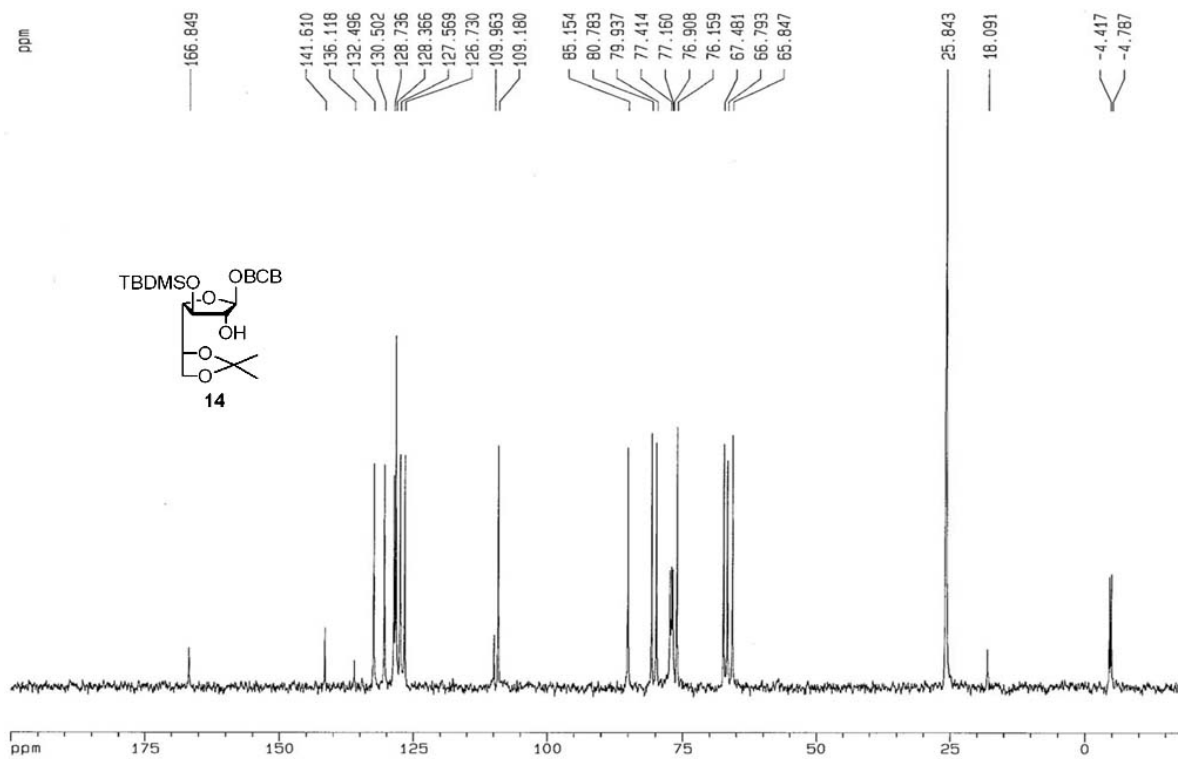

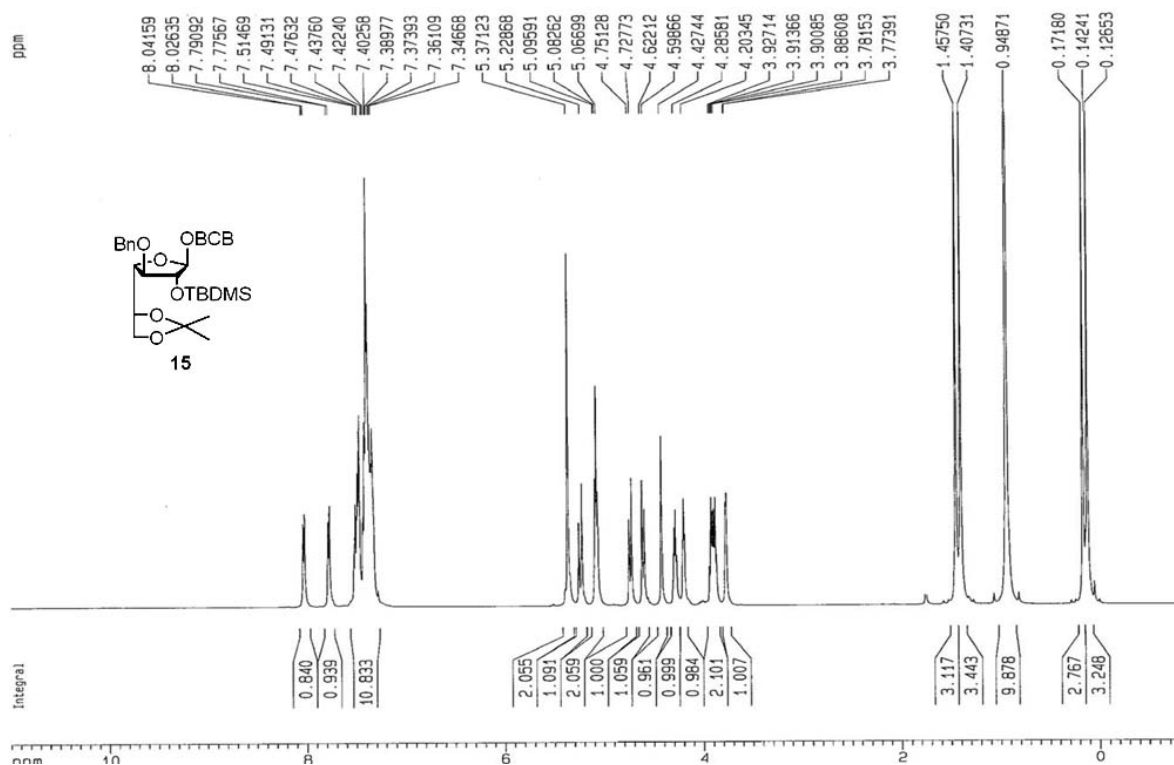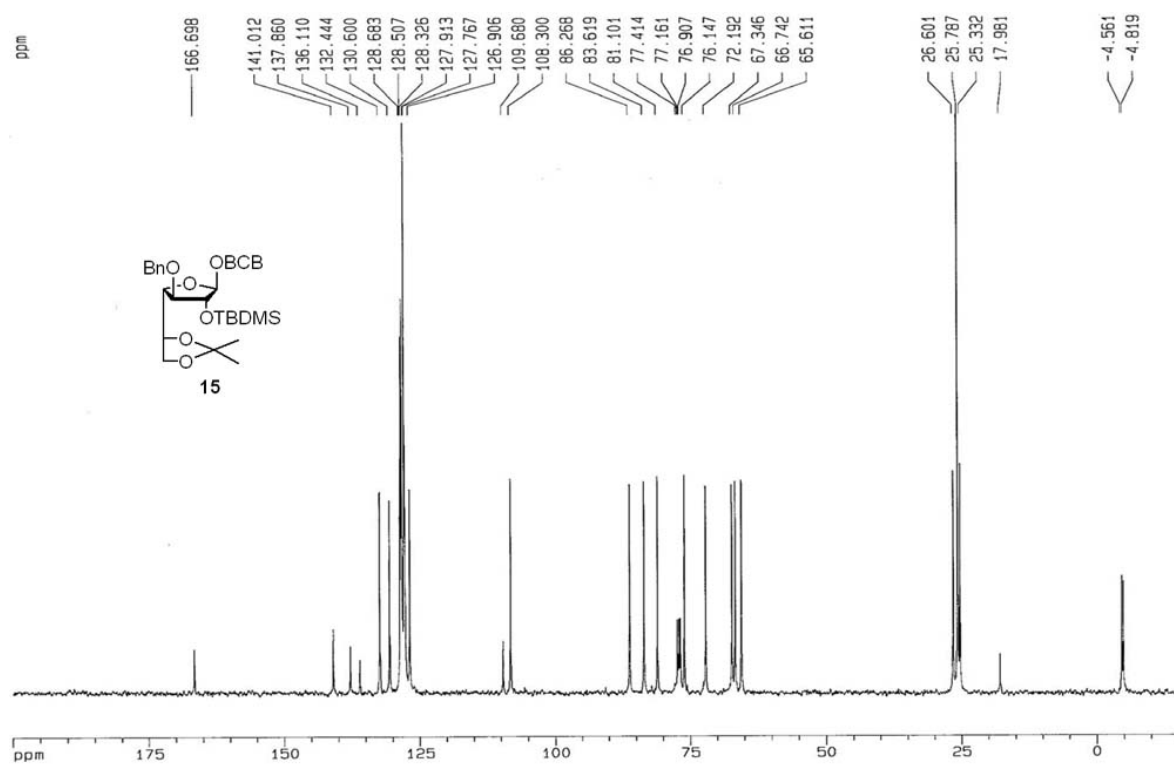

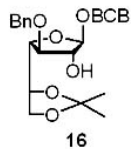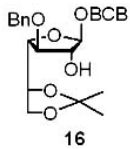

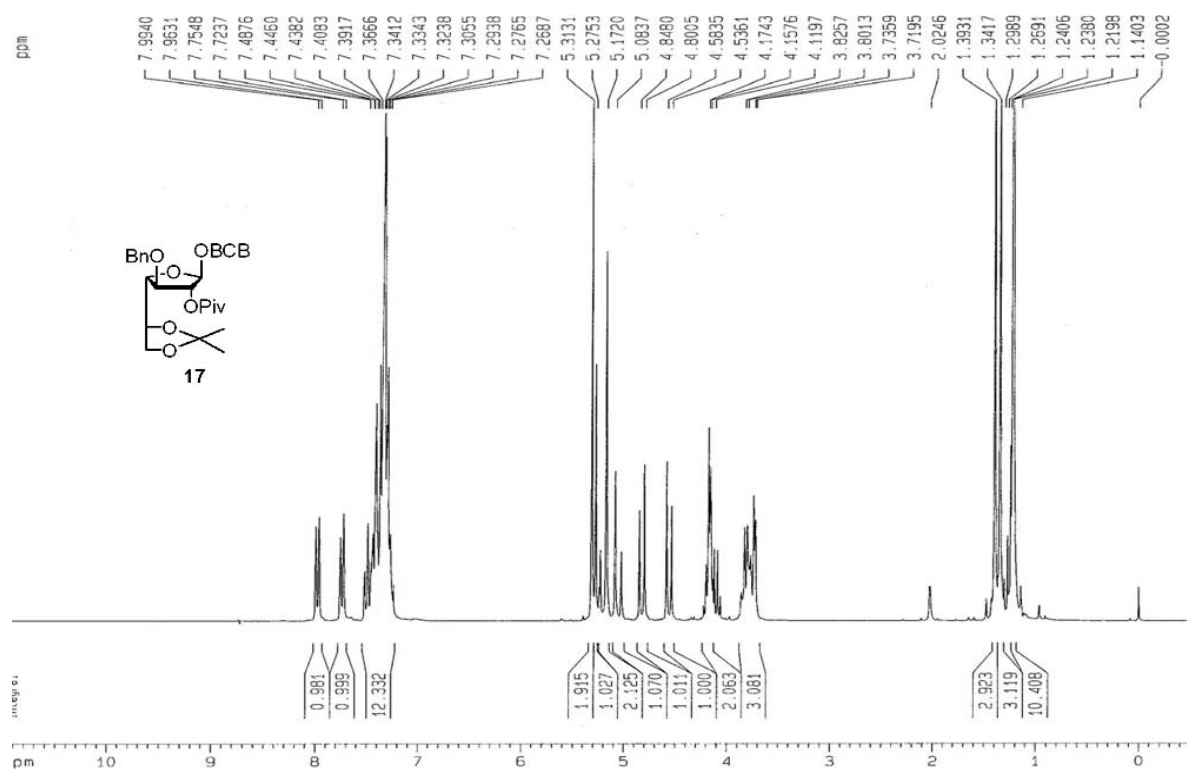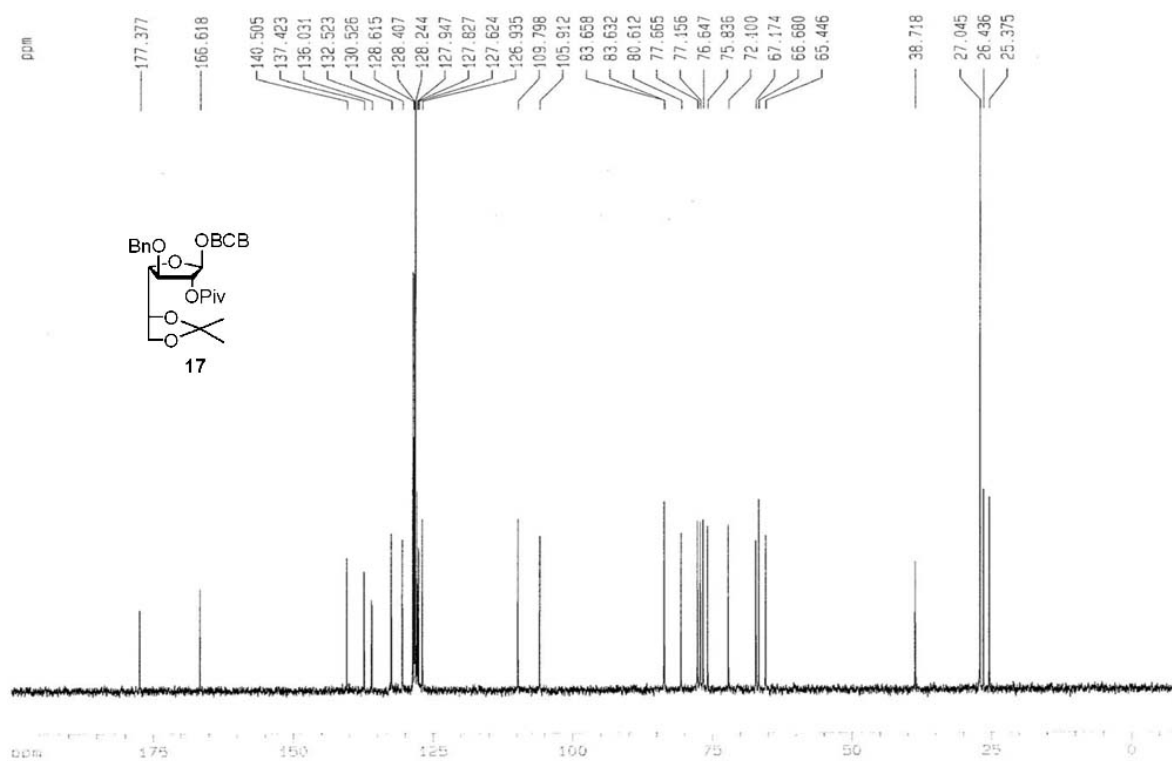

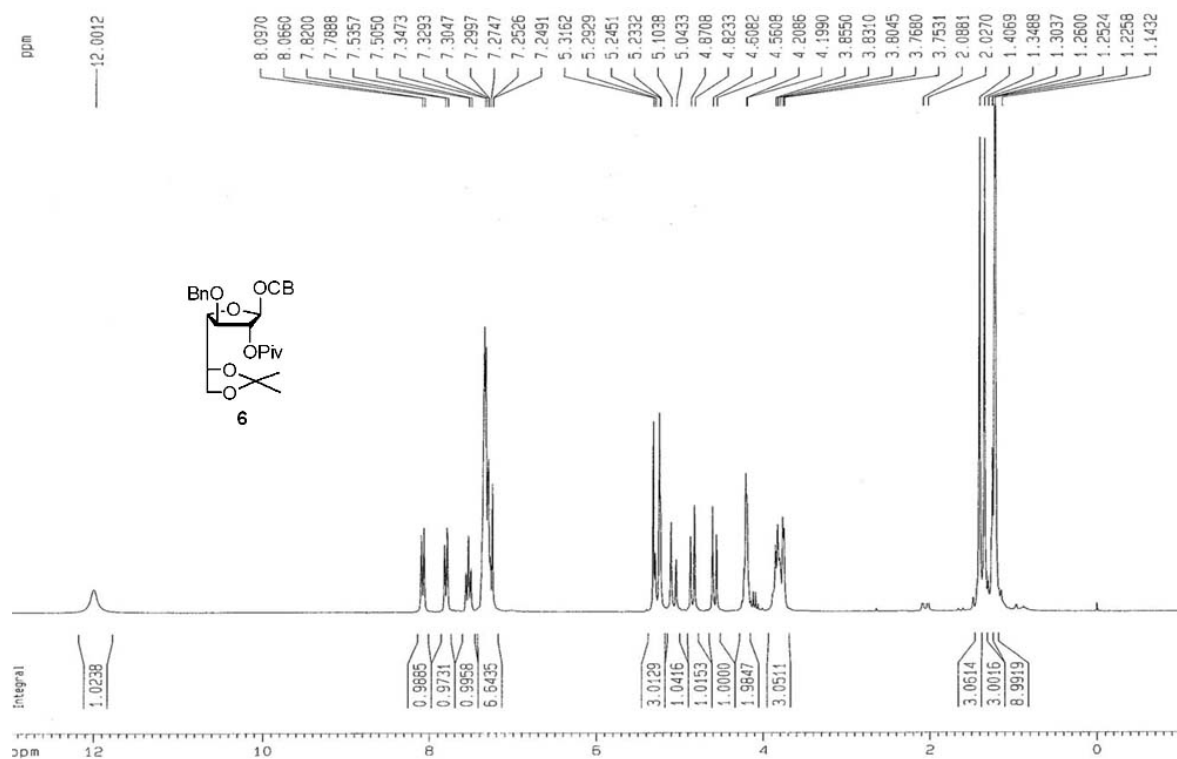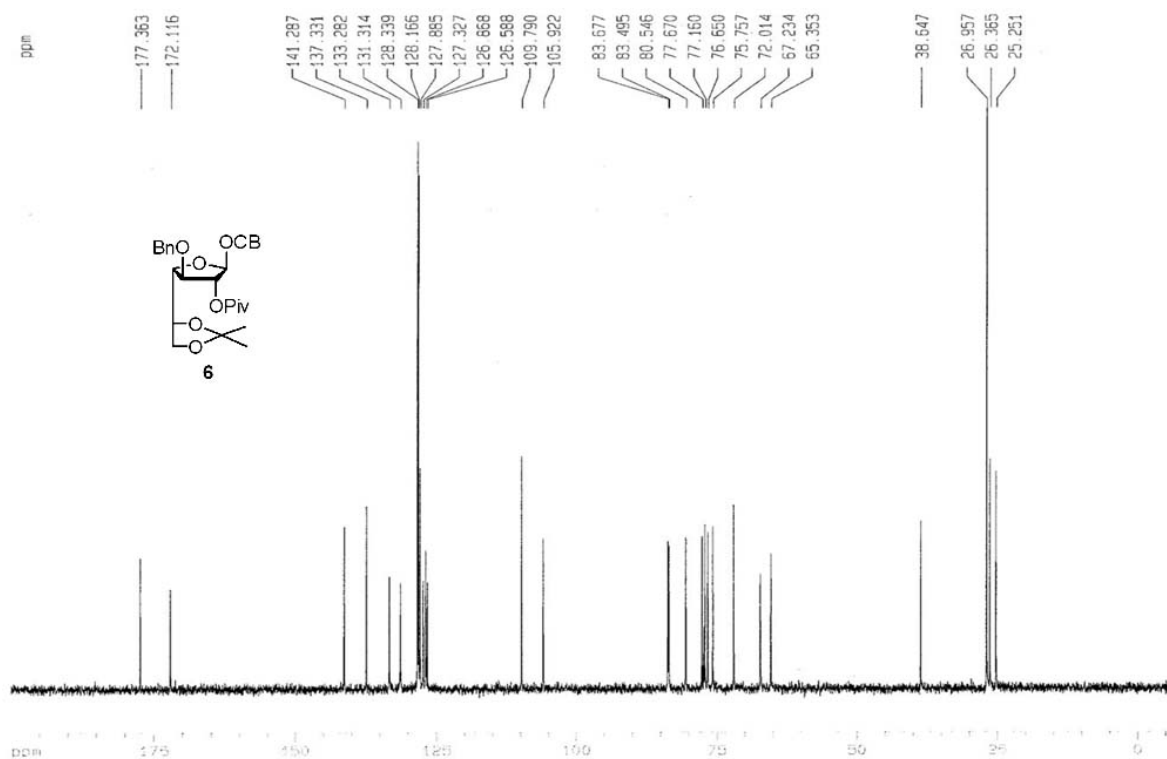

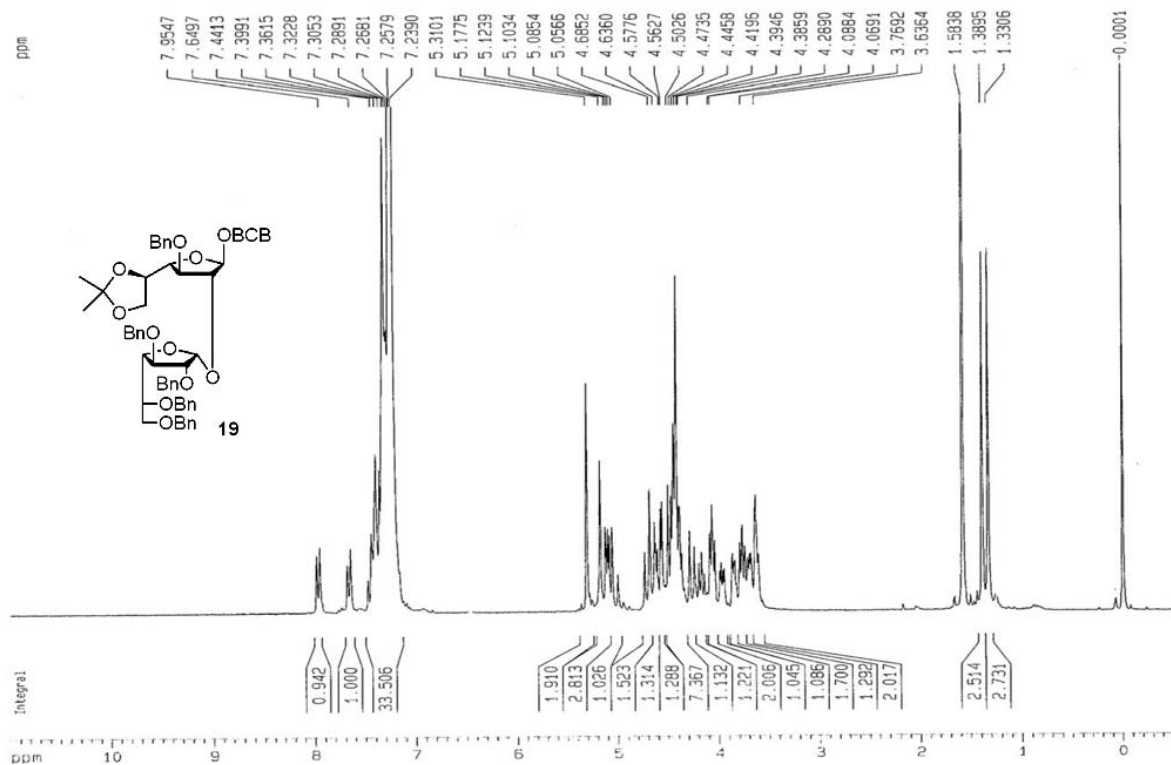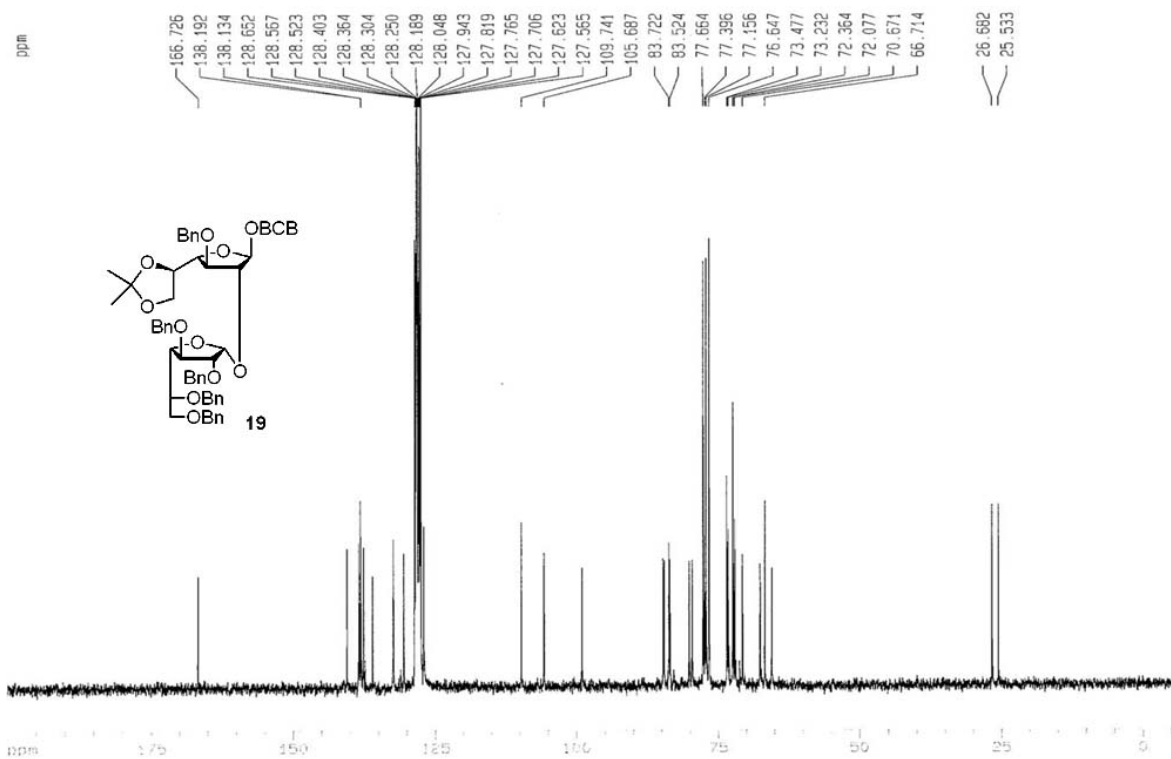

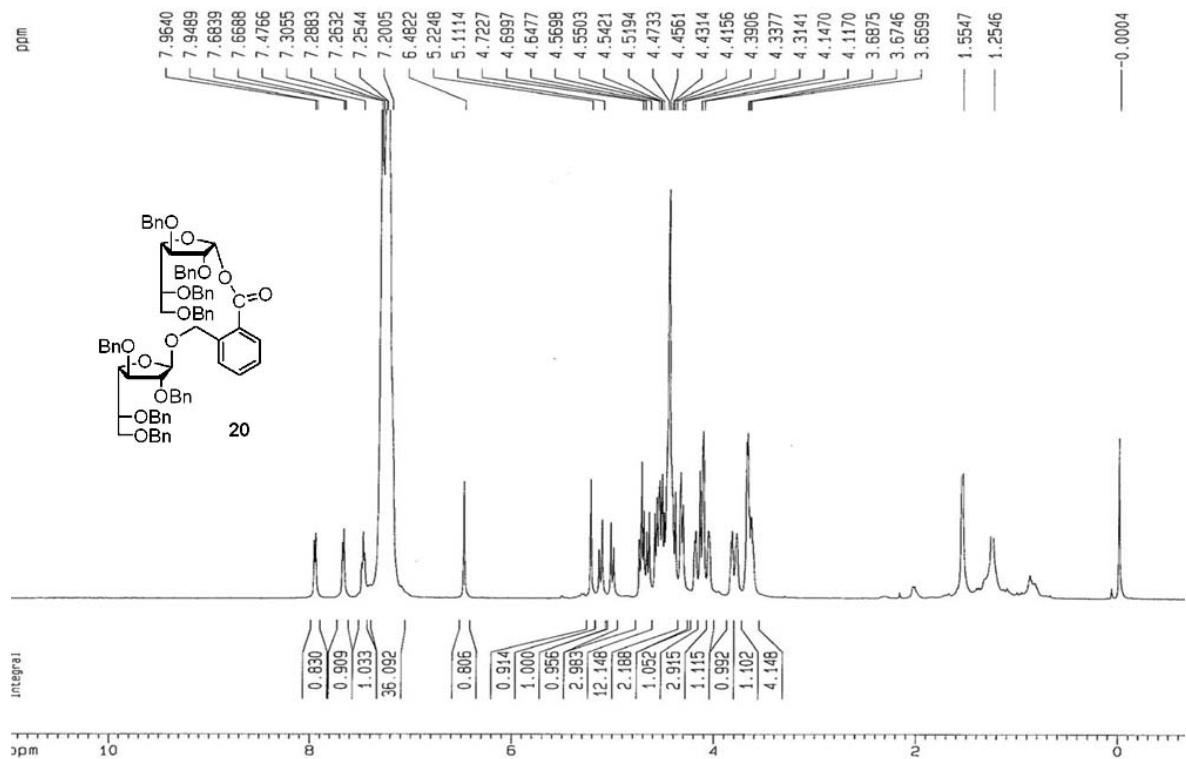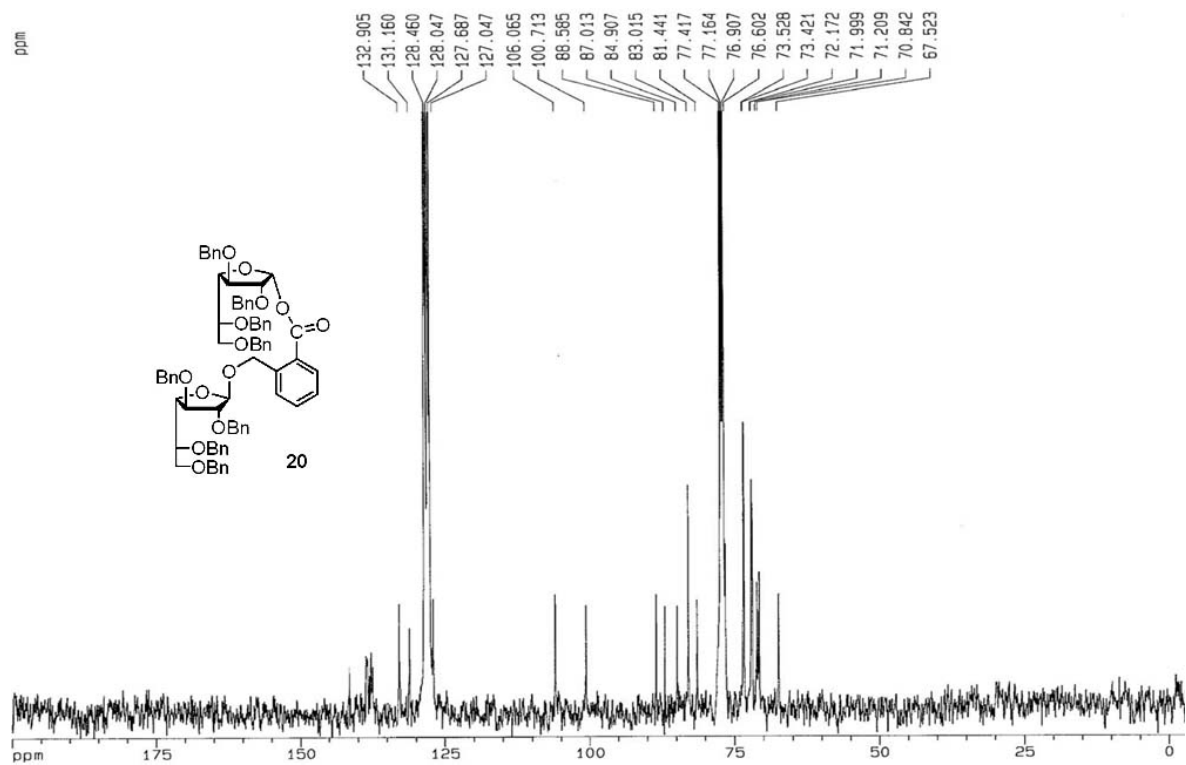

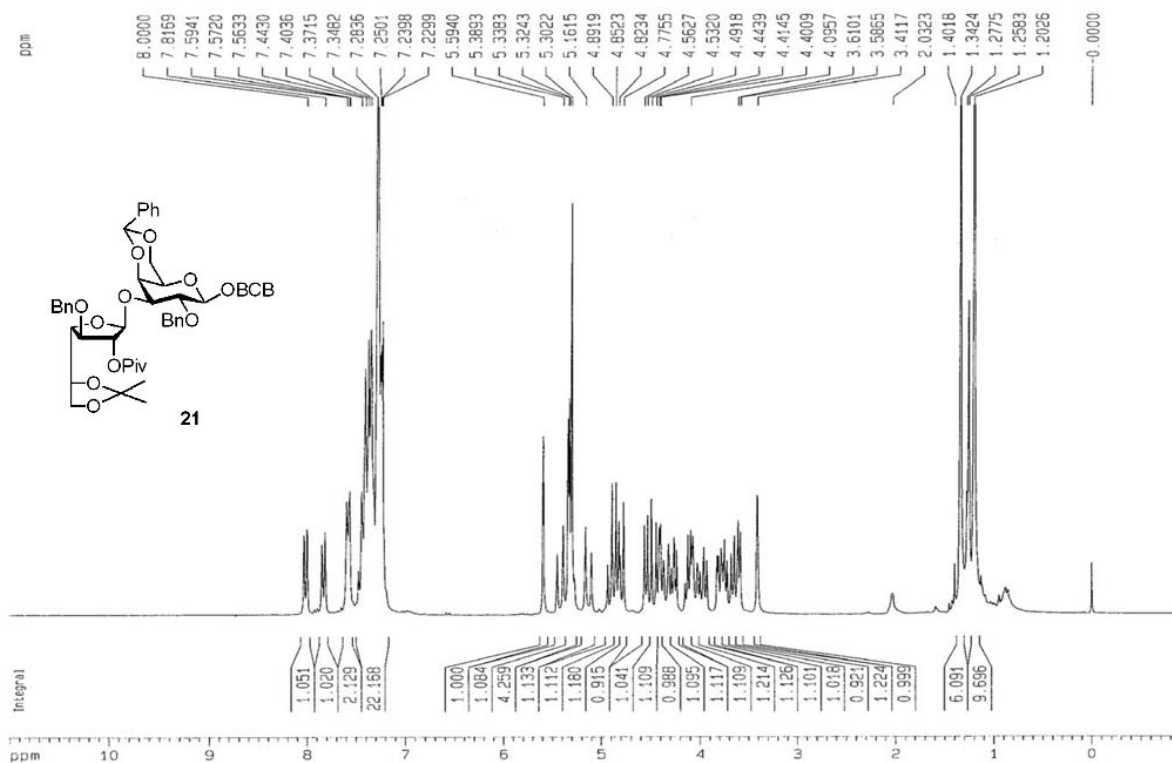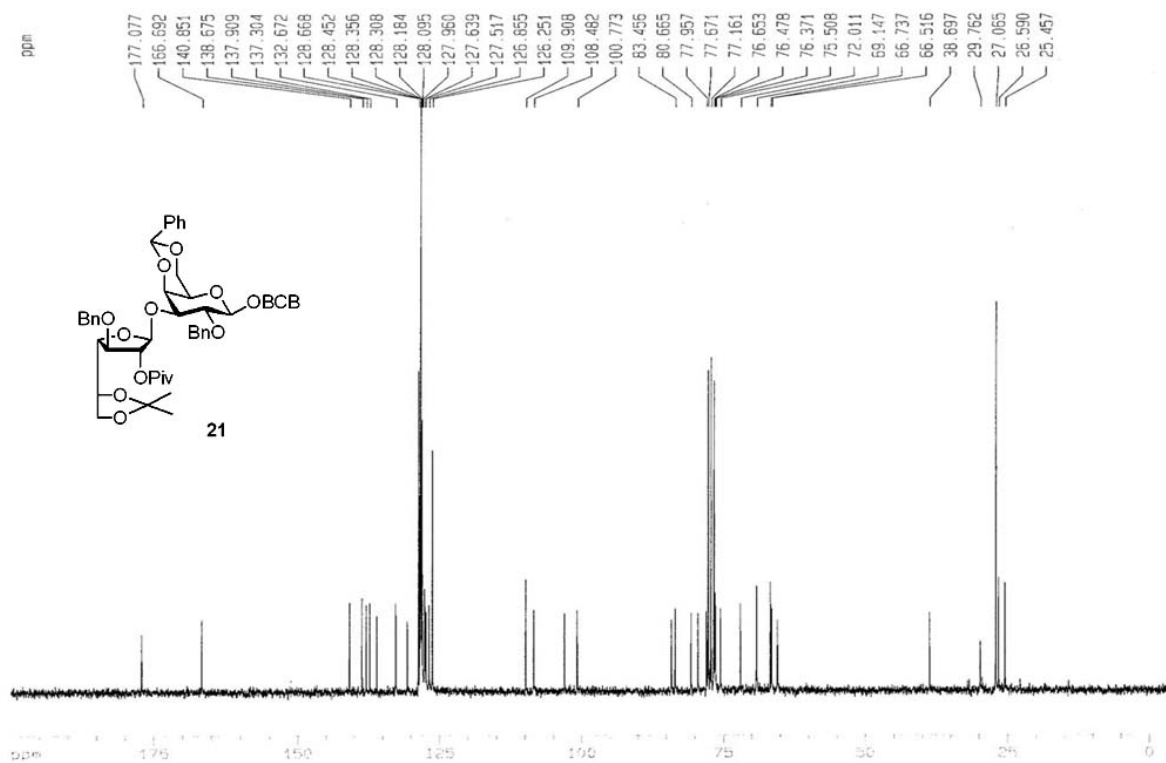

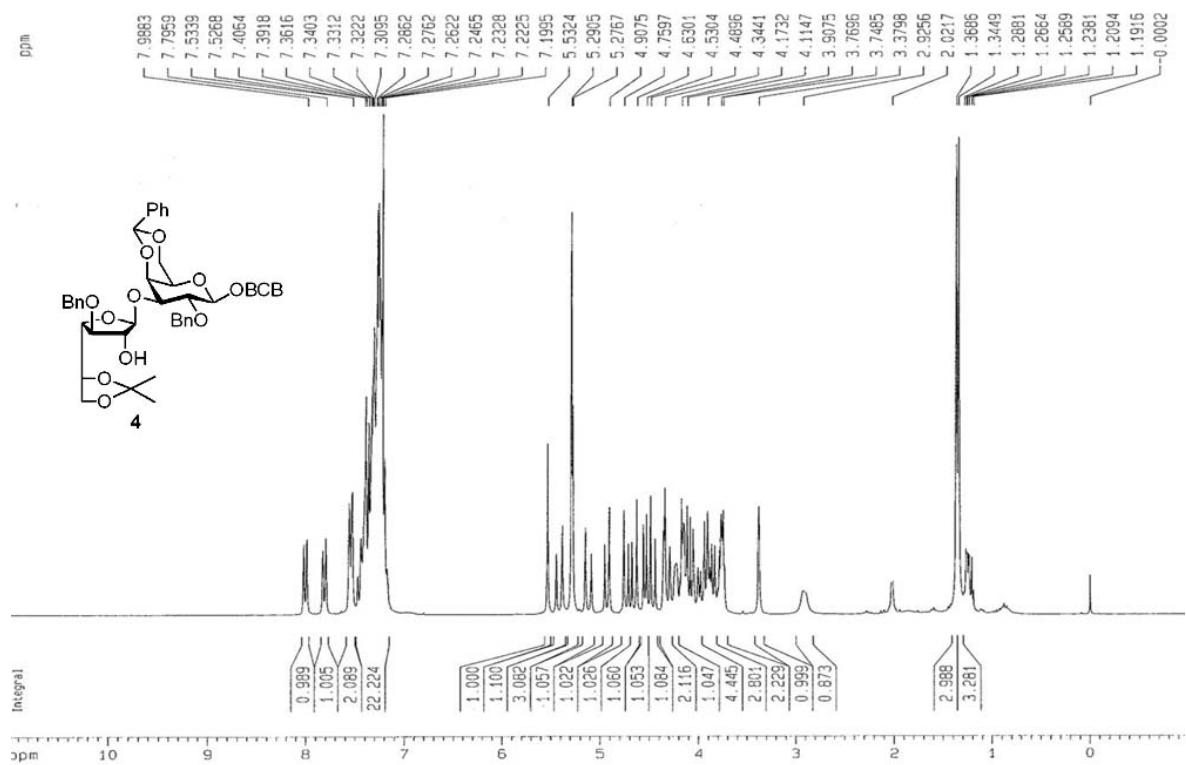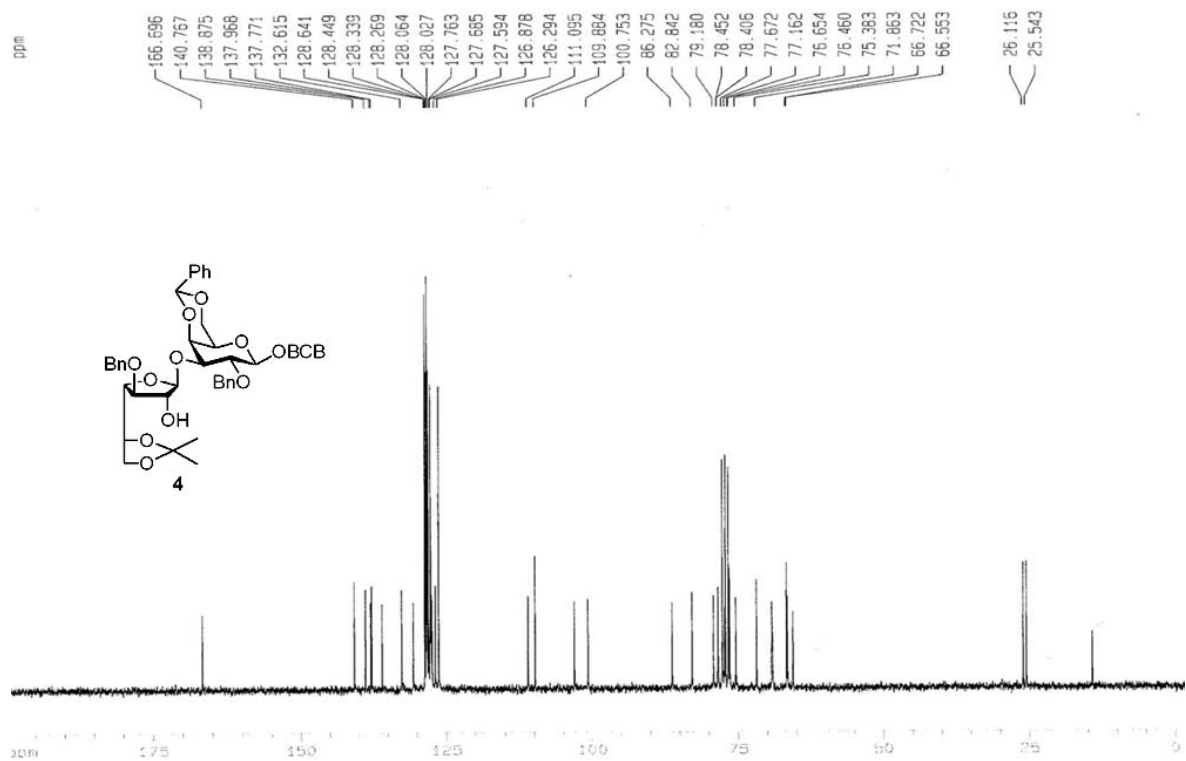

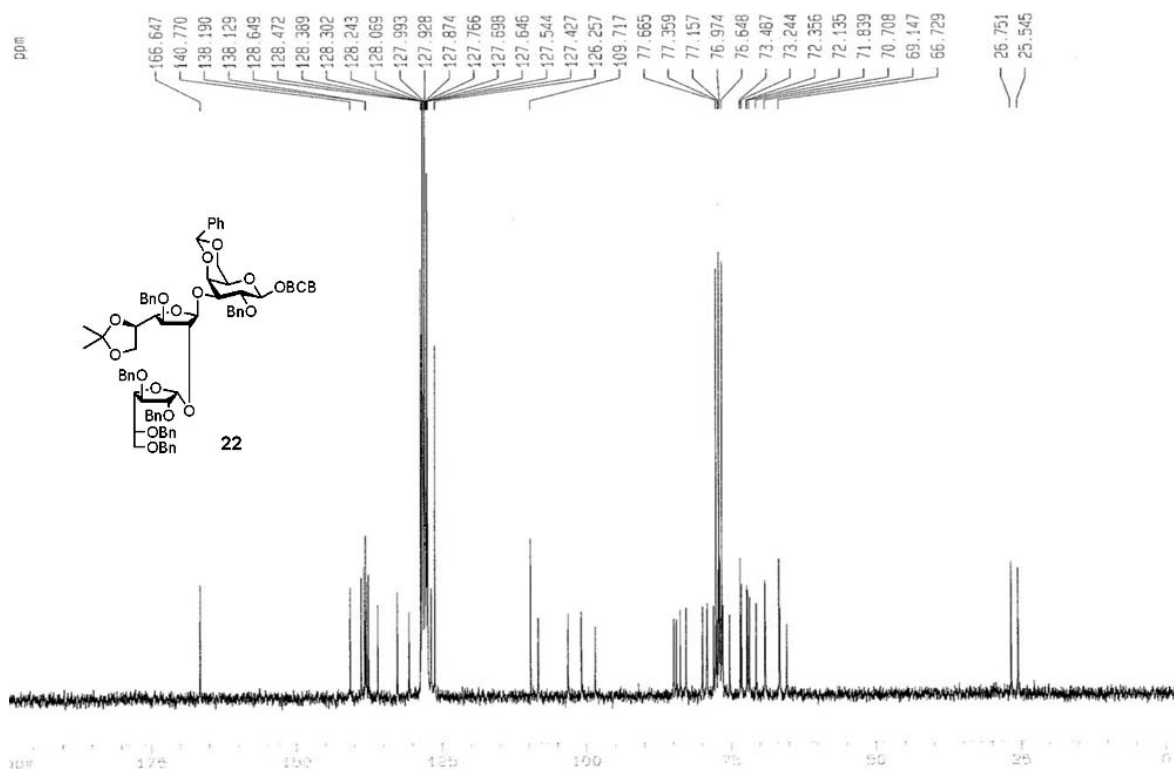

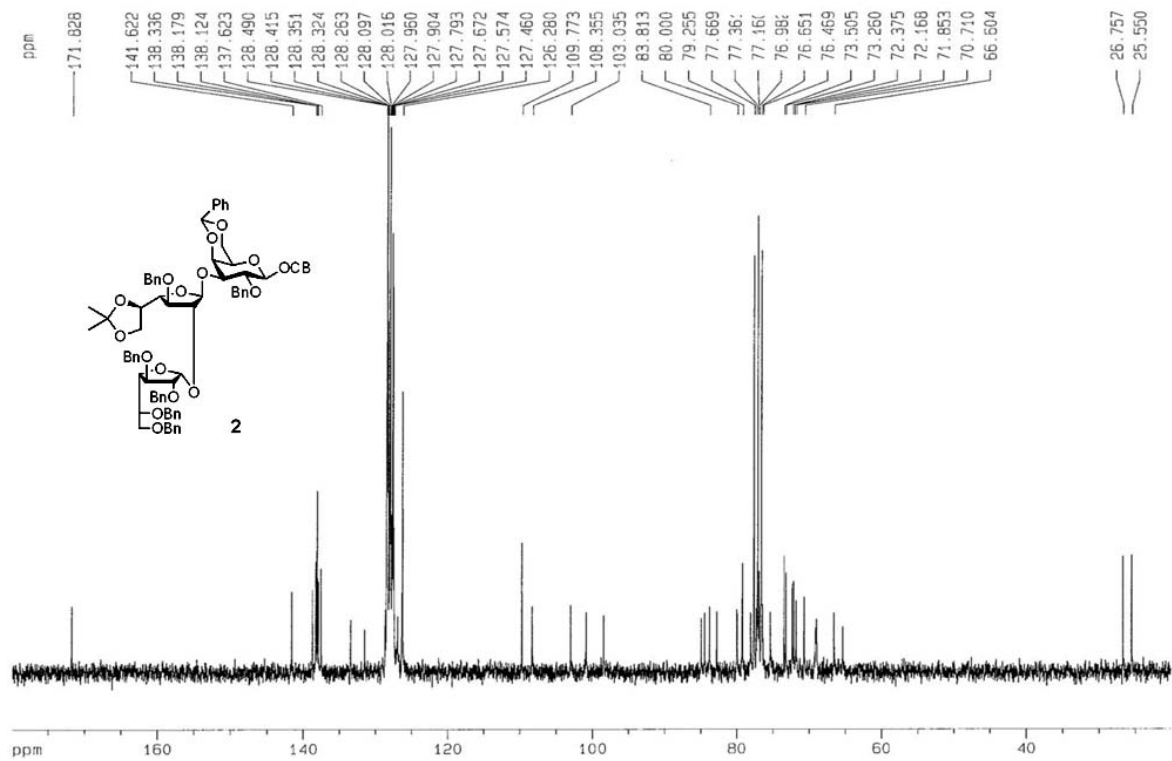

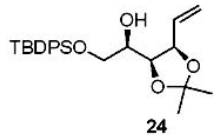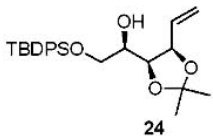

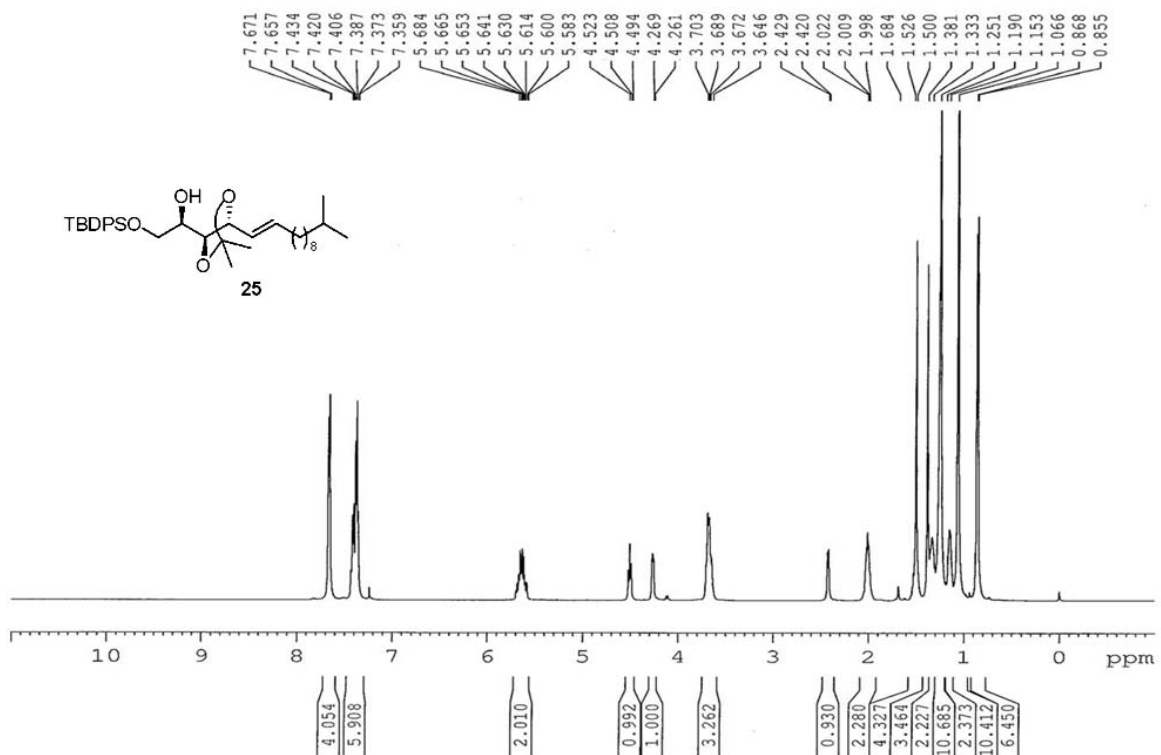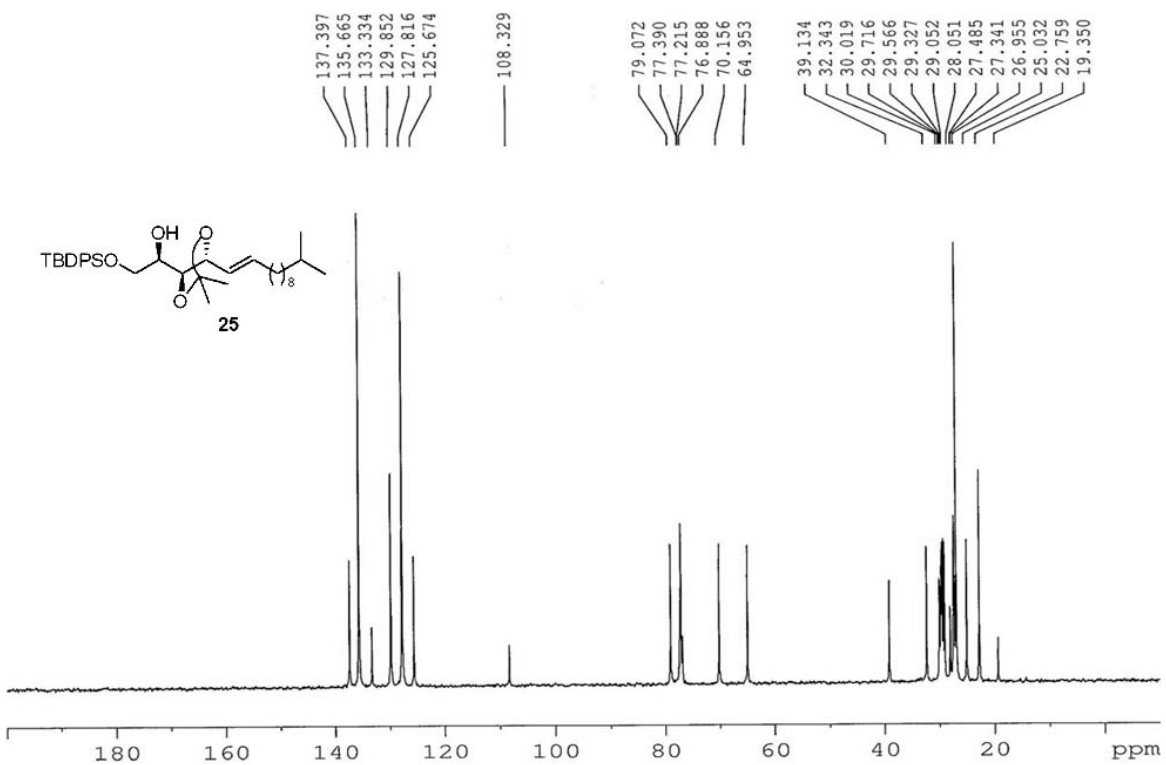

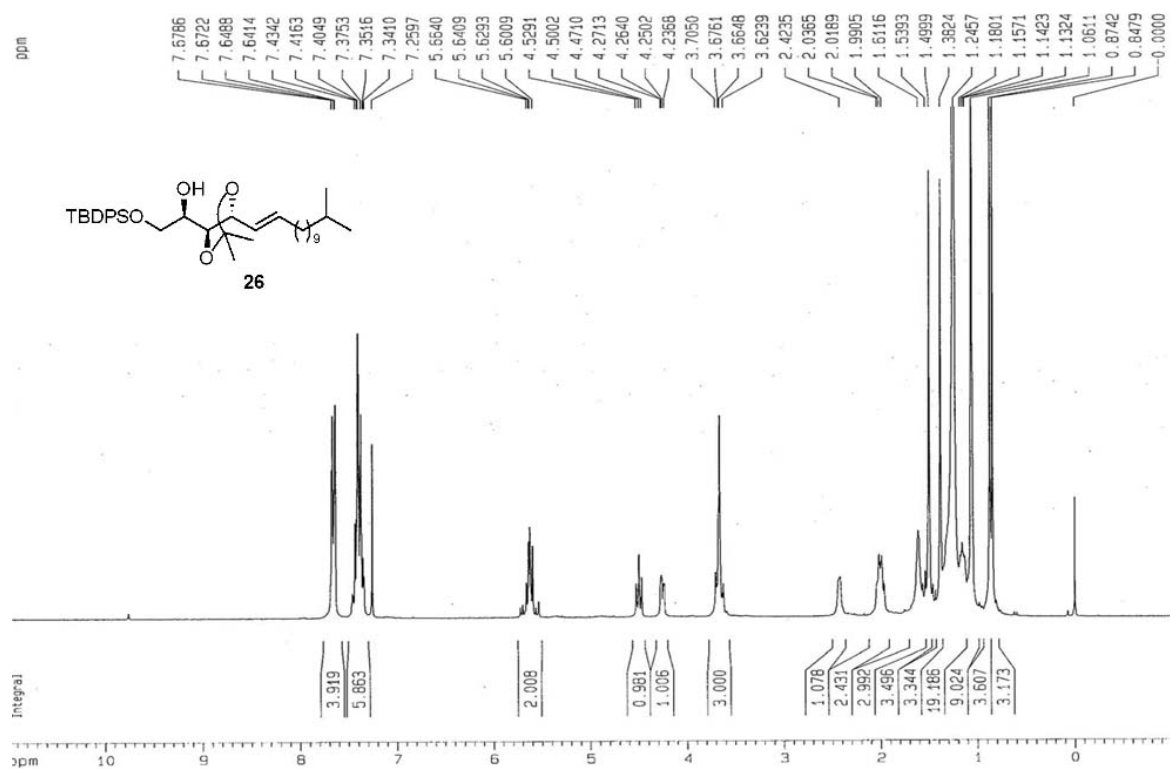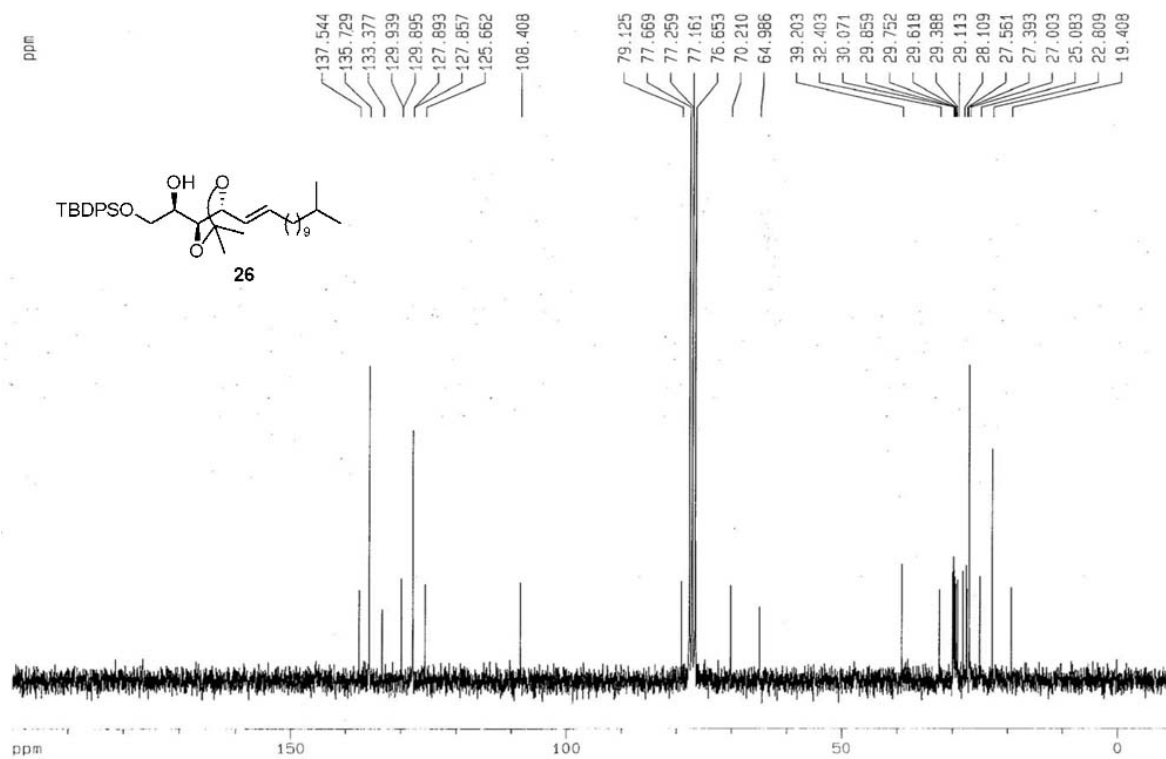



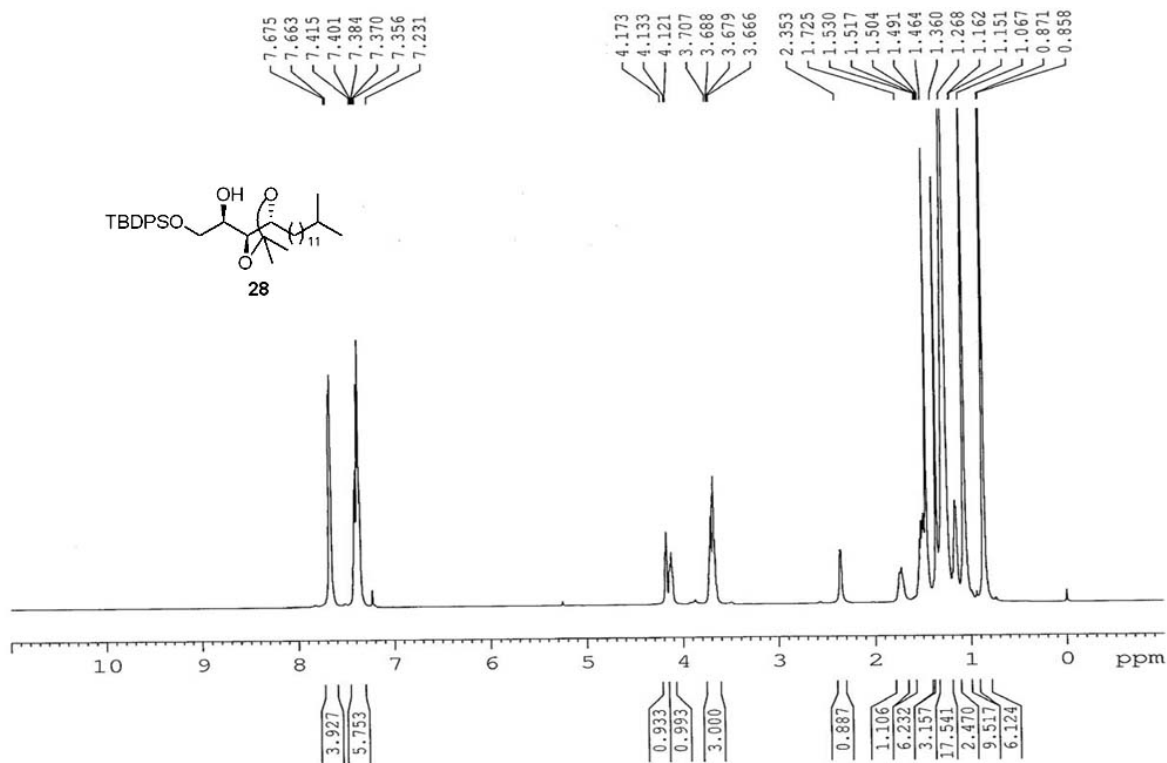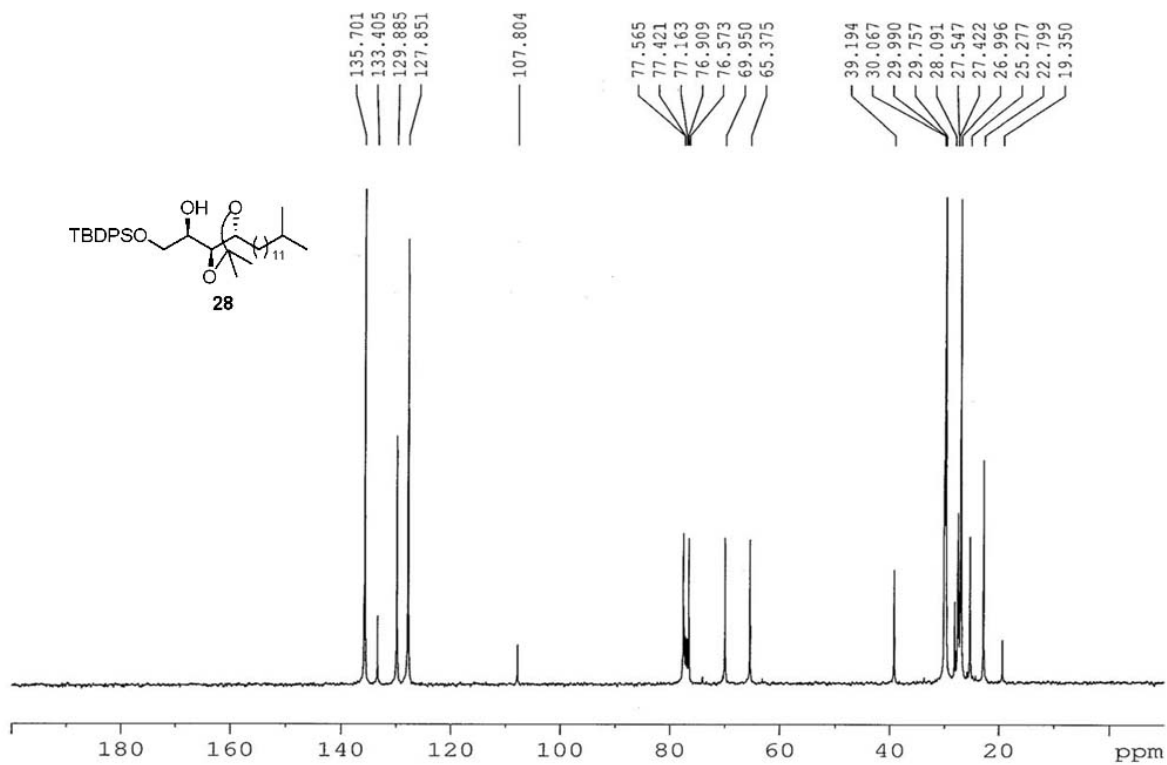

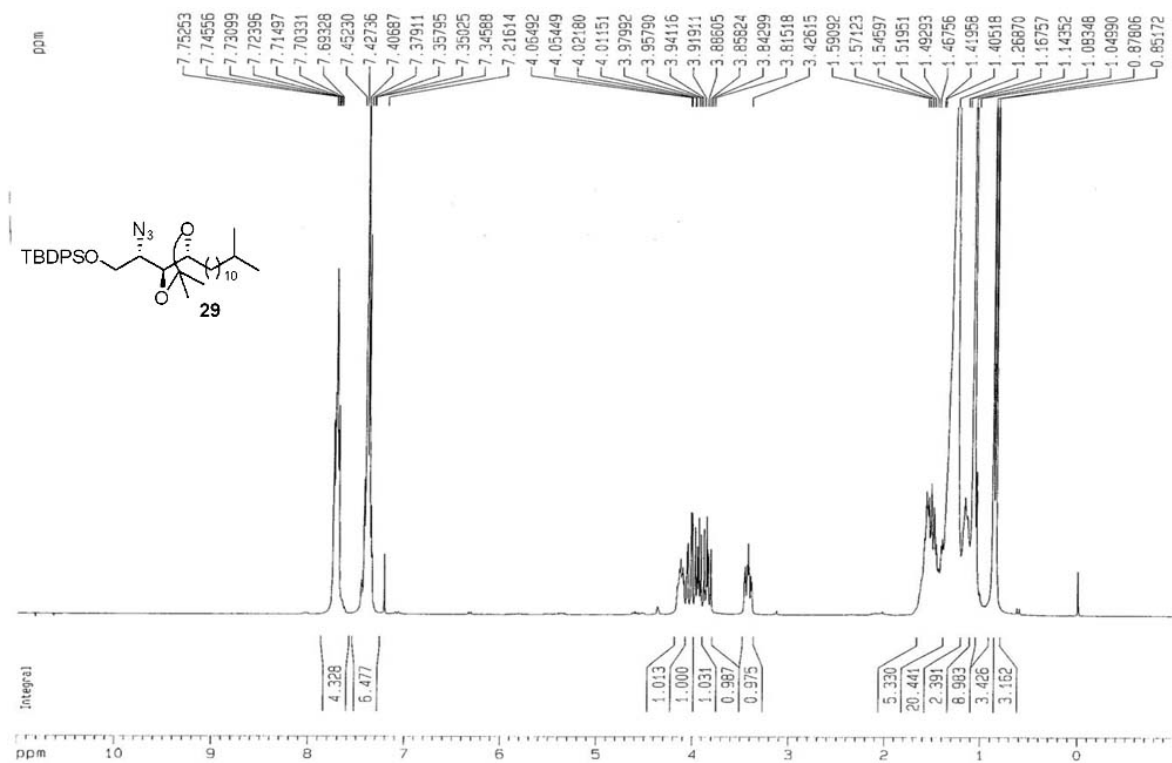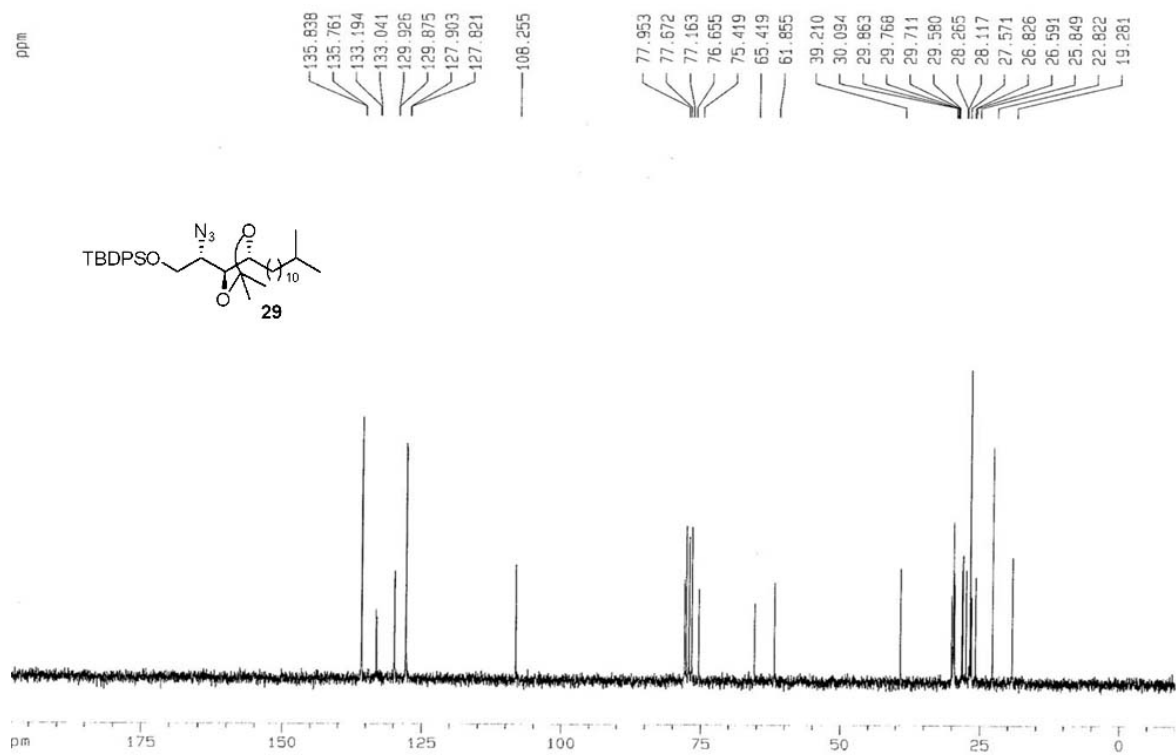

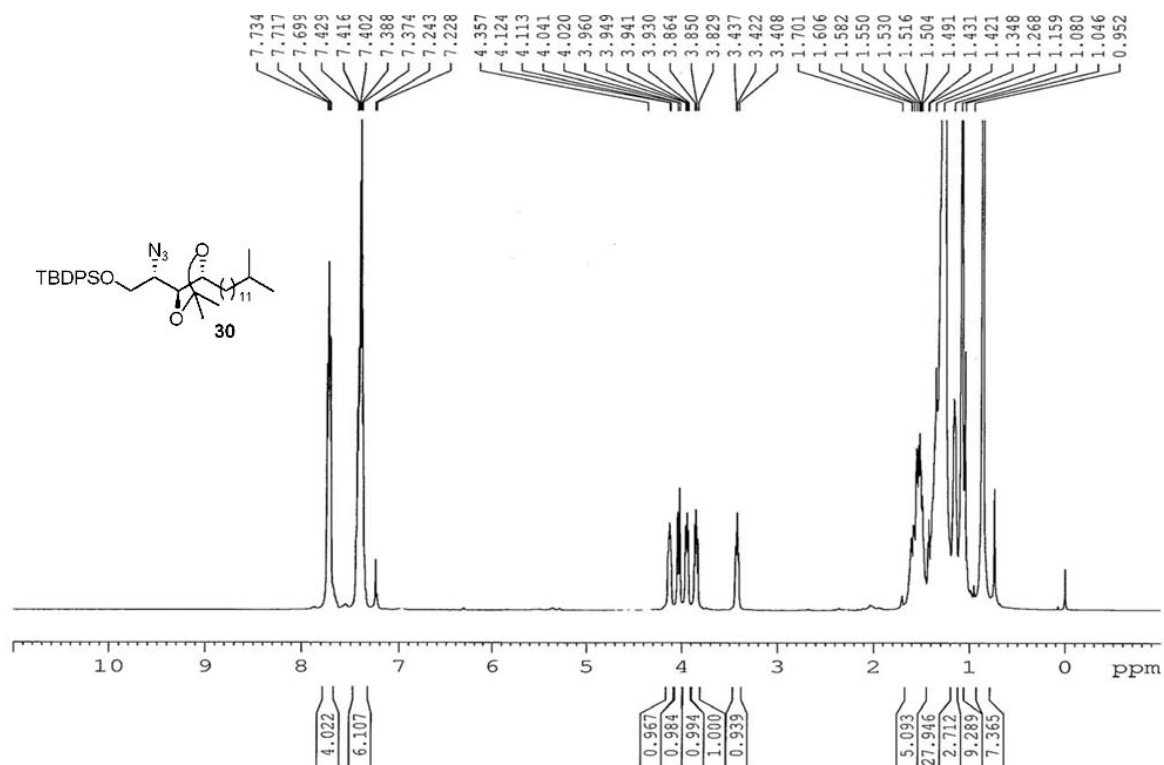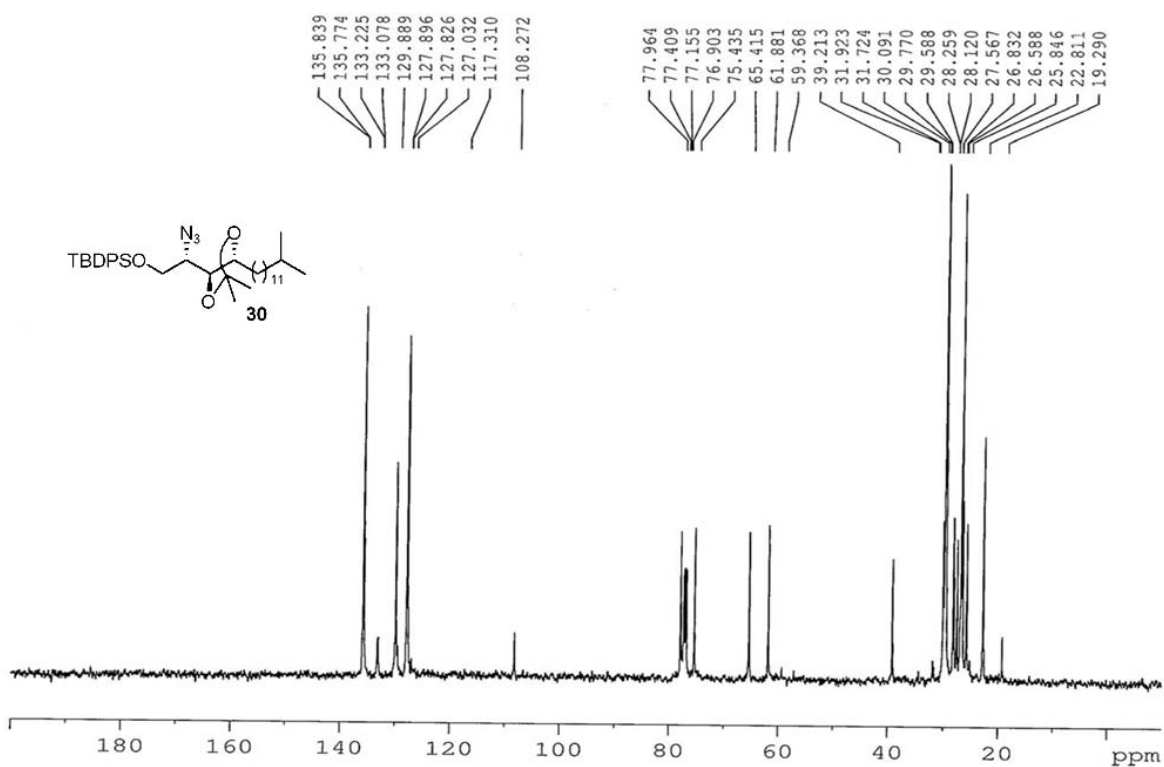

Supplement: Supplementary file 1 [file 4768153]
